# Supplementary material
Source: PubMed Central journal article supplement (PMC7667882)
Supplement: EMBJ-39-e104941-s001.pdf [file EMBJ-39-e104941-s001.pdf]

## Appendix Table of Content

EMBOJ-2020-104941R\_AppendixFigS1-7

Appendix Figure S1

Appendix Figure S2

Appendix Figure S3

Appendix Figure S4

Appendix Figure S5

Appendix Figure S6

Appendix Figure S7

EMBOJ-2020-104941R\_AppendixTable\_S1

EMBOJ-2020-104941R\_AppendixTable\_S2

### **Additional references (Appendix Table S1)**

Blanvillain R, Wei S, Wei P, Kim J H and Ow D (2011) Stress tolerance to stress escape in plants: role of the OXS2 zinc-finger transcription factor family. *EMBO J.* 30(18): 3812-3822.

Cerutti H, Osman M, Grandoni P and Jagendorf AT (1992) A homolog of Escherichia coli RecA protein in plastids of higher plants. *Proc. Natl. Acad. Sci. USA.* 89:8068–8072.

Gleave AP (1992) A versatile binary vector system with a T-DNA organisational structure conducive to efficient integration of cloned DNA into the plant genome. *Plant Mol. Biol.* 20: 1203-1207.

Liebers M, Chevalier F, Blanvillain R and Pfannschmidt T (2018) PAP genes are tissue- and cell-specific markers of chloroplast development. *Planta.* 248(3): 629-646.

Pfalz J and Pfannschmidt T (2015) Plastid nucleoids: evolutionary reconstruction of a DNA/protein structure with prokaryotic ancestry. *Front. Plant Sci.* 6:220. See artwork on the cover of the eBook: The proteins of plastid nucleoids – structure, function and regulation.

## Appendix Legends

---

**Appendix Figure S1| (Related to Figure 1) Genetic analysis of the *pap8-1* mutant. A** The two phenotypic classes [WT] and [albino] from a *pap8-1/+* segregating progeny and their ratio in **B** calculated from N=604 plants. **C** Box plot (Min, 1<sup>st</sup> quartile, median, 3<sup>rd</sup> quartile, Max) of cotyledon width 5 days after germination (DAG) in wild type and albino plants grown *in vitro* under 30  $\mu\text{mol}\cdot\text{m}^{-2}\cdot\text{s}^{-1}$  of white light.

**Appendix Figure S2| (Related to Figure 1 and 3) Flow chart of the *pap8-1* functional complementation test.** *p8-1*, *pap8-1* allele associated with *nptII*, neomycin phosphotransferase II marker used to select plants resistant to kanamycin (Kan<sup>R</sup>) although this resistance is partially lost in *pap8-1*. **A** Heterozygosity test on the progeny of one plant, if 1/4 of albino plants appear then the tested seeds were used for floral dip with an allelic frequency of 1/3 for *pap8-1*, *Agrobacterium*-mediated transformation; *hptII*, hygromycin phosphotransferase II gene to select resistant plants (Hyg<sup>R</sup>) from those that are untransformed and sensitive (Hyg<sup>S</sup>). Selection under low red light (660 nm at 8  $\mu\text{mol}\cdot\text{m}^{-2}\cdot\text{s}^{-1}$ ) allowing for rapid elongation of Hyg<sup>R</sup> plants. The etiolating response cannot be used with PBG that causes a strong de-etiolated phenotype. Primary transformants (T1) were PCR-selected for the presence of the tested *goi* (gene of interest), presence of the *pap8-1* allele, and the wild-type allele. The yellow scenario represents a successful complementation test in T1 (FC); the albino plant in brackets may be retrieved in some tests at a low ratio (1/6 of all T1) as negative for the complementation test (noC). The white box represents a common event of interest (1/3 of all T1 carrying the *goi* and one allele *pap8-1*). Conclusion is made after testing the genetics in the T2 generation. **B**, **C** Heterozygosity test to retrieve doubly homozygous (**C**) complemented T3 line with the pPAP8::PAP8 transgene (p8P8).

**Appendix Figure S3| (Related to Figure 2) PAP8 promoter analysis. A** Cartoon representing the different annotations of the promoter and the plot of local % of W= (A or T) in steps of 10 nucleotides of the nucleic acid sequence. Red, 5'-untranslated regions; pink, coding sequence of At1g21610 upstream gene on the reverse strand; **B** Table of the occurrences (occ.) of binding sites detected for the different transcription factors (TF) families using PlantPan3<sup>26</sup>. The promoter was broken down to two regions (-497 to -97) and (-97 to +1); **C** Selected binding sites represented on the (-497 to +63) PAP8 promoter sequence, >, plus strand; <, minus strand; <-->, element detected on both strands; the yellow box depicts the near palindromic bZIP element found at -97; annotations for individual elements are given according to Table S2.

**Appendix Figure S4| (Related to Figure 2) Transactivation test in onion epidermal cells using the dual luciferase reporter assay.** TF, transcription factor; Luc, luciferase; glow is the emission of photons after the protein samples have been supplemented with the luciferase-type specific substrate. Activity of the tested transcription factor calculated as the relative value of Firefly glow / *Renilla* glow to that of the reference sample.

**Appendix Figure S5| (Related to Figure 3) A Immunoblots showing the levels of PAP8 and PAP5 in Col0, *pap8-1* (*p8-1*) or *pap5-2* (*p5-2*) respectively, using the recombinant proteins PAP8 (rP8) and PAP5 (rP5) as controls.** Proteins on SDS-PAGE were detected by instant blue to display equal loading. **B** PAP8 immunodetection in fractions obtained during organelles enrichment; rP8, as above; S1, soluble fraction in the supernatant after centrifugation of the blender-disrupted cellular sample; Tot, total plant extract; C+N, pellet containing organelles, mostly chloroplasts and nuclei separated from S1; H3 antibody used to evaluate nuclear enrichment and a Coomassie staining presented as loading control.

**Appendix Figure S6| (Related to Fig. 6) Bimolecular fluorescence complementation test.** Using PAP8<sup>ΔCTP</sup>-NY (P8Δc-NY) and PAP5<sup>ΔCTP</sup>-YC (P5Δc-YC) and the reverse combination; PAP8 tested positive using P8Δc-NY with P8Δc-YC.; arrowheads indicate nuclei. P8Δc-NY, P5Δc-NY, P8Δc-YC and P5Δc-YC tested negative using respectively both split YFP fragments alone ( $\emptyset$ -YC or  $\emptyset$ -NY). PAP10-RFP (P10-RFP) used as internal control for transfection efficacy knowing YFP signal could be absent. The number followed with a letter refers to the pictured cell and the ratio depicts the number of green-fluorescent cells over red-fluorescent cells. White arrowheads indicate the nuclei and the scale bar equals 20  $\mu\text{m}$ .

**Appendix Figure S7| (Related to Fig. 6) Variations of the diffusion coefficient and the peak intensities of PAP8 in function of the PAP5/PAP8 concentration ratios.** Triangles, normalized values of the translational diffusion coefficient of PAP8. Squares, normalized intensities of peaks in the 7.5–8 ppm range (structured). Circles, normalized intensities of peaks outside the 7.5–8 ppm range (unstructured).

**Appendix Table S1| Plasmid overview and the primers used for their cloning.** bR: bacterial resistance to antibiotics; carb, carbenicillin; kan, kanamycin; spec, spectinomycin. PlantR, plant resistance used as the selection marker and brought by the binary vector: Hygro, hygromycin. Genotype used for this study: Col-0 or wt, wild type Columbia; *p8-1*, heterogeneous progeny from individual heterozygotes *pap8-1/+* used for transformation. Primers are given from 5' to 3'. n.a. not applicable. fc1 and fc2, each promoter driving PAP8 coding sequence (TG) was tested in functional complementation: two lines doubly heterozygous *pap8-1/+*; TG/- segregated around 1/16-albino plants. (fc1) pP8<sup>-257</sup>::PAP8, Line 1 (n=95,  $\epsilon=0.76<<1.96$ ); Line 2 (n=62,  $\epsilon=0.06<<1.96$ ). (fc2) pP8<sup>-97</sup>::PAP8, Line 1: n=389,  $\epsilon=0.34<<1.96$ ; Line 2: n=392,  $\epsilon=0.32<<1.96$  ( $\epsilon$ -test,  $\alpha=0.05$ ; Fisher Yates).

**Appendix Table S2| Output from PlantPan3: Search for transcription factors binding sites.** Annotations as on the corresponding website; position is given relative to the transcriptional initiation site.

## Appendix Figure S1

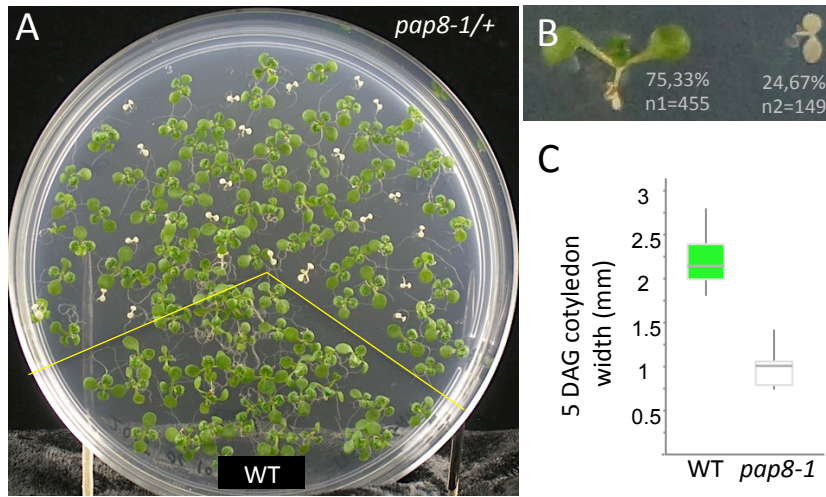

**Appendix Figure S1 | (Related to Figure 1) Genetic analysis of the *pap8-1* mutant.** **A** The two phenotypic classes [WT] and [albino] from a *pap8-1/+* segregating progeny and their ratio in **B** calculated from N=604 plants. **C** Box plot (Min, 1<sup>st</sup> quartile, median, 3<sup>rd</sup> quartile, Max) of cotyledon width 5 days after germination (DAG) in wild type and albino plants grown *in vitro* under 30  $\mu\text{mol}\cdot\text{m}^{-2}\cdot\text{s}^{-1}$  of white light.

# Appendix Figure S2

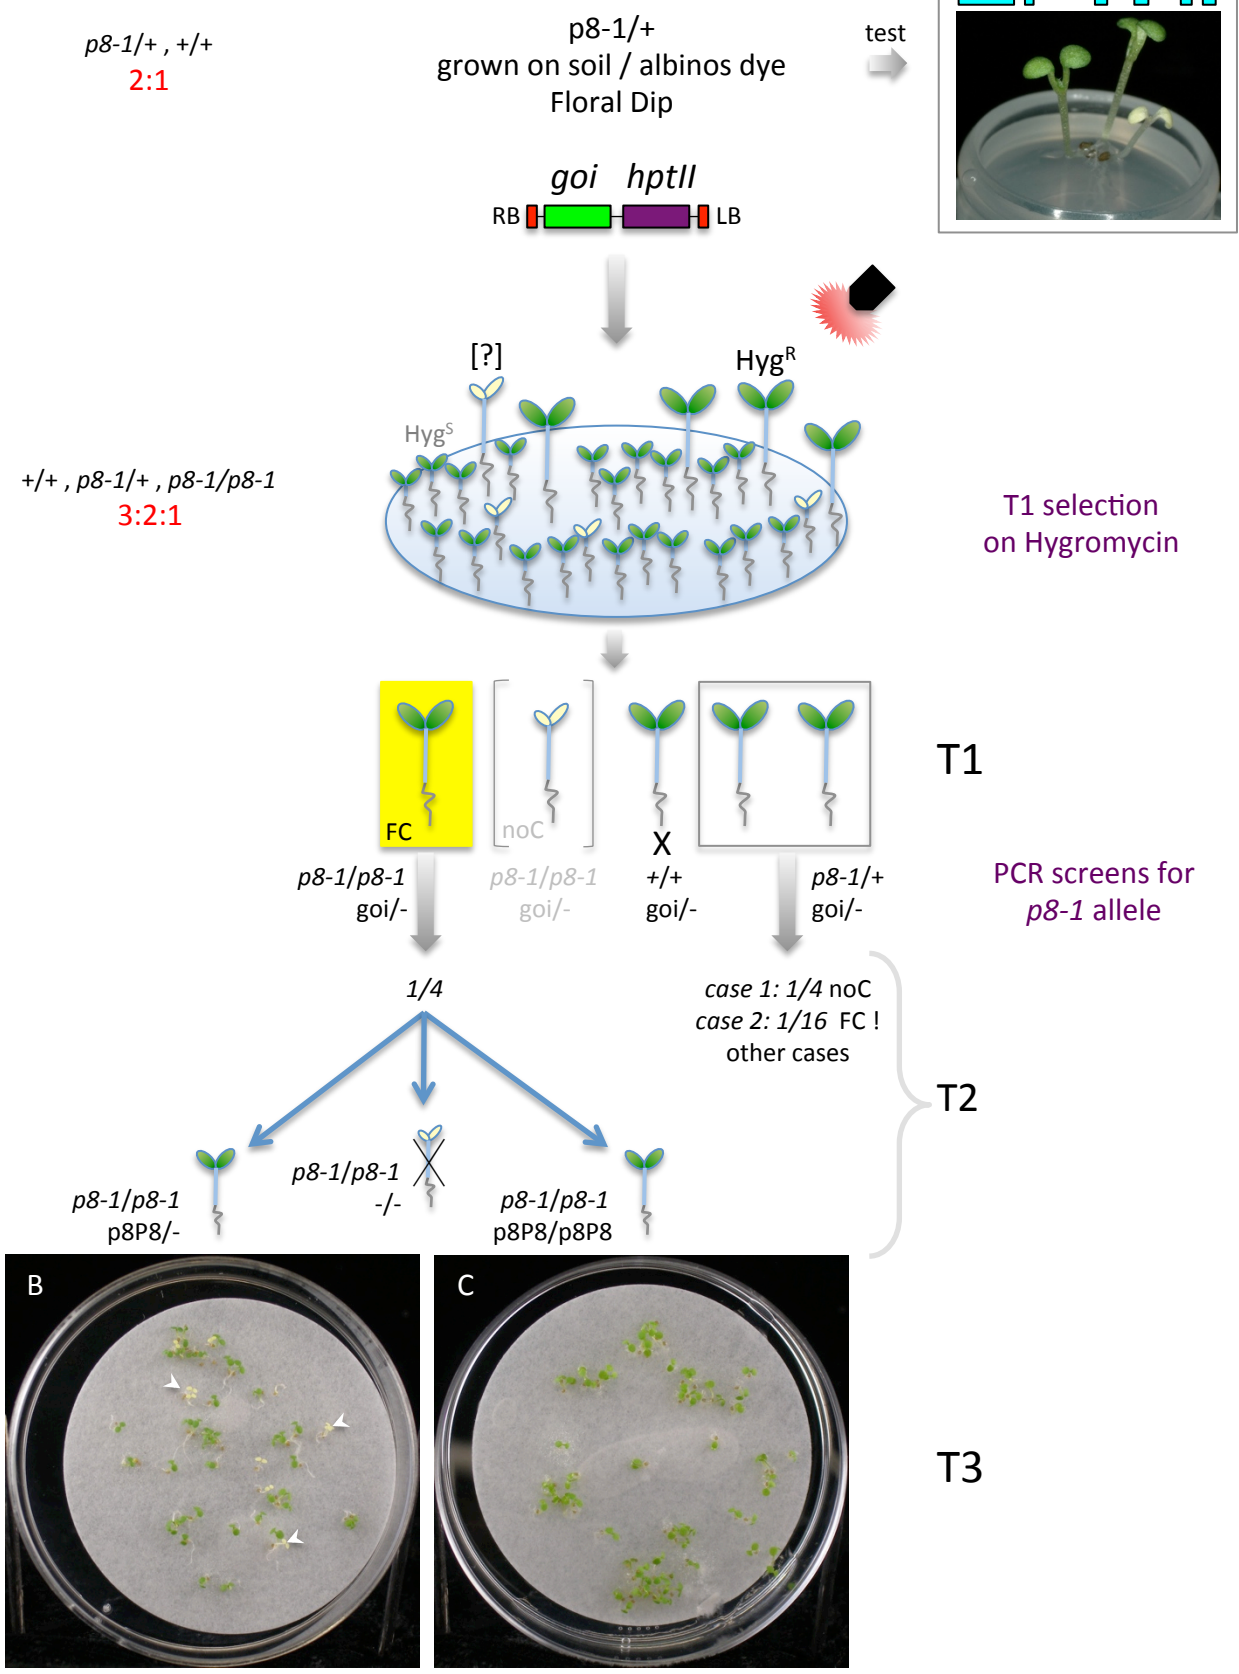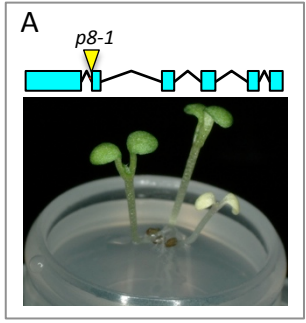

T1 selection on Hygromycin

T1

PCR screens for  $p8-1$  allele

T2

T3

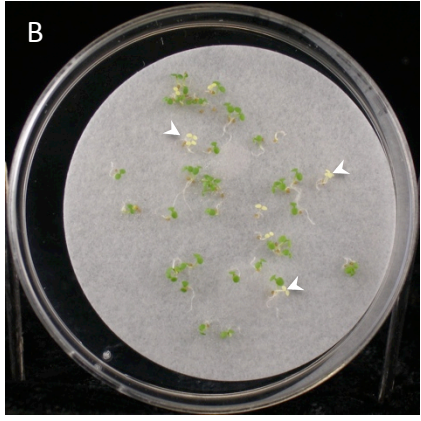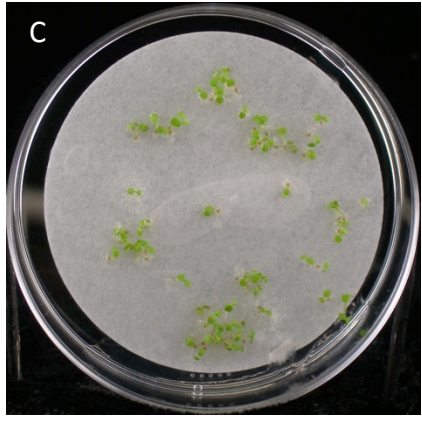

## Appendix Figure S2

**Appendix Figure S2 | (Related to Figure 1 and 3) Flow chart of the *pap8-1* functional complementation test.** *p8-1*, *pap8-1* allele associated with *nptII*, neomycin phosphotransferase II marker used to select plants resistant to kanamycin (Kan<sup>R</sup>) although this resistance is partially lost in *pap8-1*. **A** Heterozygosity test on the progeny of one plant, if 1/4 of albino plants appear then the tested seeds were used for floral dip with an allelic frequency of 1/3 for *pap8-1*, *Agrobacterium*-mediated transformation; *hptII*, hygromycin phosphotransferase II gene to select resistant plants (Hyg<sup>R</sup>) from those that are untransformed and sensitive (Hyg<sup>S</sup>). Selection under low red light (660 nm at 8  $\mu\text{mol}\cdot\text{m}^{-2}\cdot\text{s}^{-1}$ ) allowing for rapid elongation of Hyg<sup>R</sup> plants. The etiolating response cannot be used with PBG that causes a strong de-etiolated phenotype. Primary transformants (T1) were PCR-selected for the presence of the tested *goi* (gene of interest), presence of the *pap8-1* allele, and the wild-type allele. The yellow scenario represents a successful complementation test in T1 (FC); the albino plant in brackets may be retrieved in some tests at a low ratio (1/6 of all T1) as negative for the complementation test (noC). The white box represents a common event of interest (1/3 of all T1 carrying the *goi* and one allele *pap8-1*). Conclusion is made after testing the genetics in the T2 generation. **B, C** Heterozygosity test to retrieve doubly homozygous (**C**) complemented T3 line with the pPAP8::PAP8 transgene (p8P8).

# Appendix Figure S3

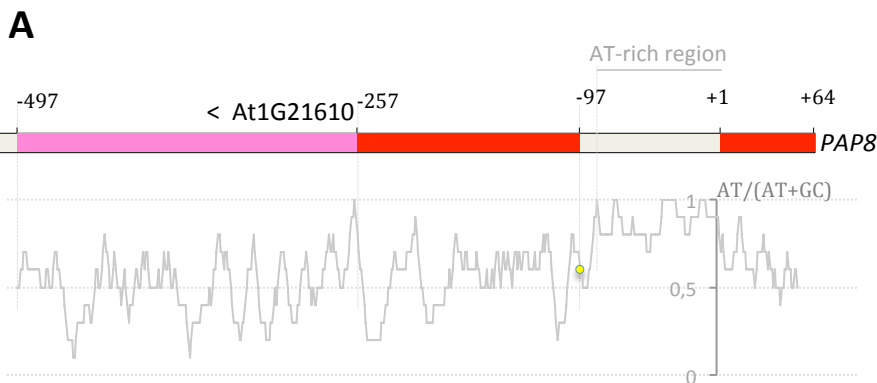

**B**

| TF Family | occ(-497-97) | occ(-97+1) |
|-----------|--------------|------------|
| AP2/ERF   | 103          | 6          |
| ARF       | 4            | 0          |
| AT-Hook   | 2            | 20         |
| bHLH      | 4            | 0          |
| bZIP      | 10           | 5          |
| C2H2      | 1            | 1          |
| C3H       | 6            | 3          |
| Dehydrin  | 17           | 0          |
| DOF       | 28           | 39         |
| EIN3      | 1            | 0          |
| GATA      | 38           | 1          |
| HD-ZIP    | 38           | 21         |
| MYB       | 17           | 9          |
| NAC       | 3            | 1          |
| NF        | 17           | 2          |
| SANT      | 27           | 6          |
| Trihelix  | 18           | 0          |
| WRKY      | 38           | 0          |
| ZF-HD     | 7            | 21         |

**C** >Promoter\_PAP8<sup>-497</sup>.Selected\_Binding\_Sites\_PlantPan3.0

```

-497 CGGTGCAATTTCGAAACTCAAGGTTAGGGTTAGCATTAGGAGGCGGGTCTGGGAACCGAAGCCGATAAACCATTGACCTTACCAGCATCCCTCATAAGCTTC -398
                                             <----->          <<<<<<
                                             WRKY >>>>         m0271_bZIP
                                             m0271_bZIP
-397 TTCCACGAAACATACGTCGTATCCCTGGCCGAAGCTCCACCTTGAGTAATTTCCGATCACGCGCCTTAAAACCTTCGGCGAGCTCTCAACAATTTCGC -298
          >>>>>>>
          m0410_bHLH                               <<<<<<
          <----->                               m0271_bZIP
          bZIP                                       >>>>>
                                                m0271_bZIP
-297 CGCCAATAGAACCACTCATCTCATTAACTCCGACATtaataattcgggtcgggtcgggtcgggatcagtttgatccactatatactaaccctgggt -198
      ----->                                <----->
      AP2/ERF                                 HD-ZIP/ AP2/ERF
      >>>>                                    <<<<<<<<<<<<<<<
      m0271_bZIP                               m0805_bHLH
                                               >>>>>>>>>>
                                               B3/ARF
                                               >>>>
                                               m0271_bZIP
-197 tcgagacggattgatcctaacagcaatcaagagagtggaatcgatgaatcgatgtagagaaactgaaactgagaagaaaaagtgcgcggtaccacaaa -98
      >>>>
      m0271_bZIP
      <<<<<<<
      m0410_bHLH
-97 atgacgctcttaattatttctaatttattttgtgttttttattcactaaaaggattattattatattatagtttttcttttttttaattgtatt +03
      <----->
      bZIP
      <----->
      HD-ZIP
+04 tttcctcgaatatctaatccacagatagatagaacctctgtgagctttatccgccttc +63
  
```

**Appendix Figure S3 | (Related to Figure 2) PAP8 promoter analysis.** **A** Cartoon representing the different annotations of the promoter and the plot of local % of W= (A or T) in steps of 10 nucleotides of the nucleic acid sequence. Red, 5'-untranslated regions; pink, coding sequence of At1g21610 upstream gene on the reverse strand; **B** Table of the occurrences (occ.) of binding sites detected for the different transcription factors (TF) families using PlantPan3<sup>26</sup>. The promoter was broken down to two regions (-497 to -97) and (-97 to +1); **C** Selected binding sites represented on the (-497 to +63) PAP8 promoter sequence, >, plus strand; <, minus strand; <-->, element detected on both strands; the yellow box depicts the near palindromic bZIP element found at -97; annotations for individual elements are given according to Table S2.

## Appendix Figure S4

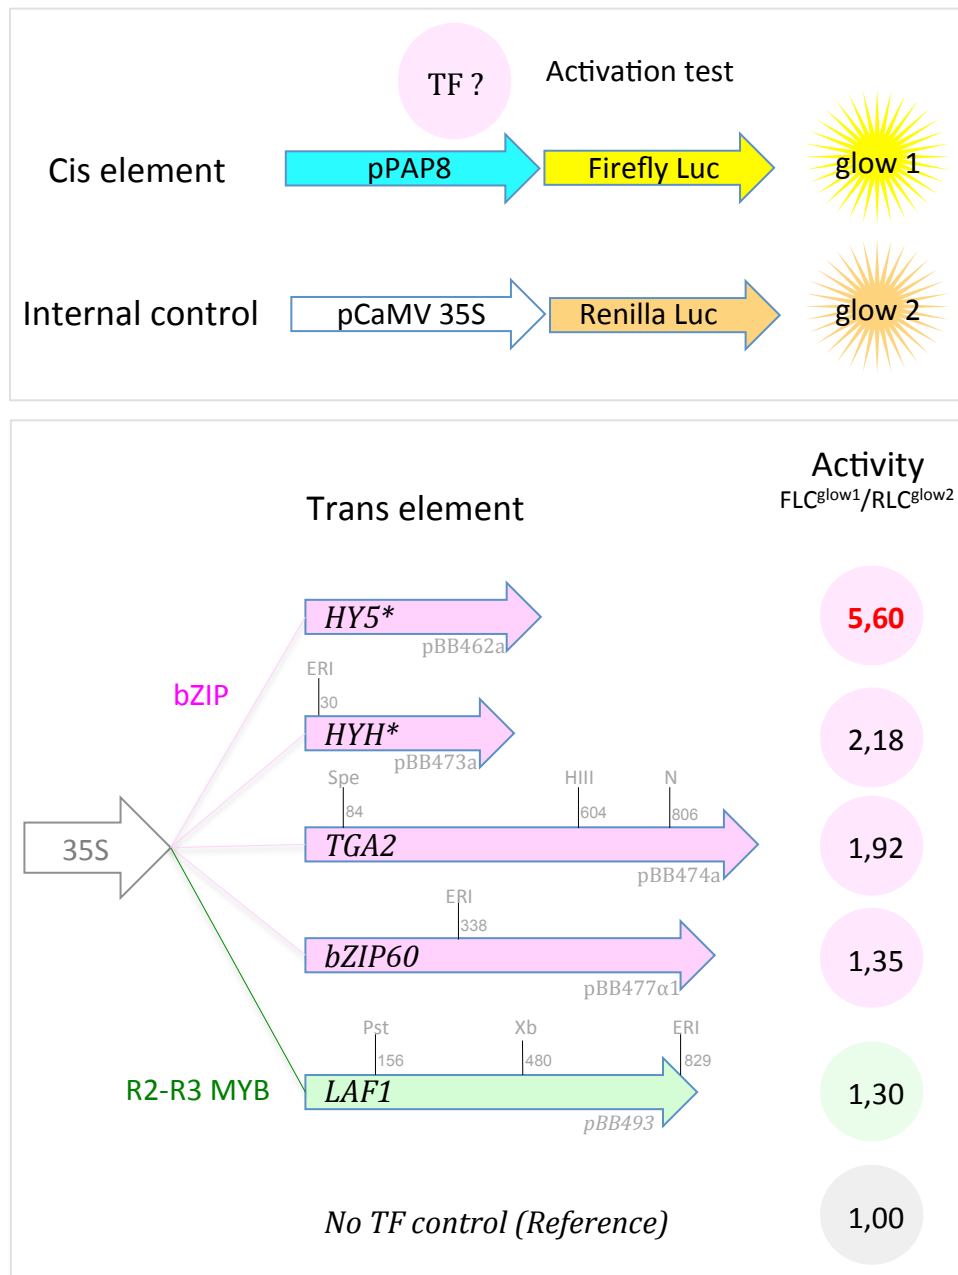

**Appendix Figure S4 | (Related to Figure 2) Transactivation test in onion epidermal cells using the dual luciferase reporter assay.** TF, transcription factor; Luc, luciferase; glow is the emission of photons after the protein samples have been supplemented with the luciferase-type specific substrate. Activity of the tested transcription factor calculated as the relative value of Firefly glow / *Renilla* glow to that of the reference sample.



## Appendix Figure S5

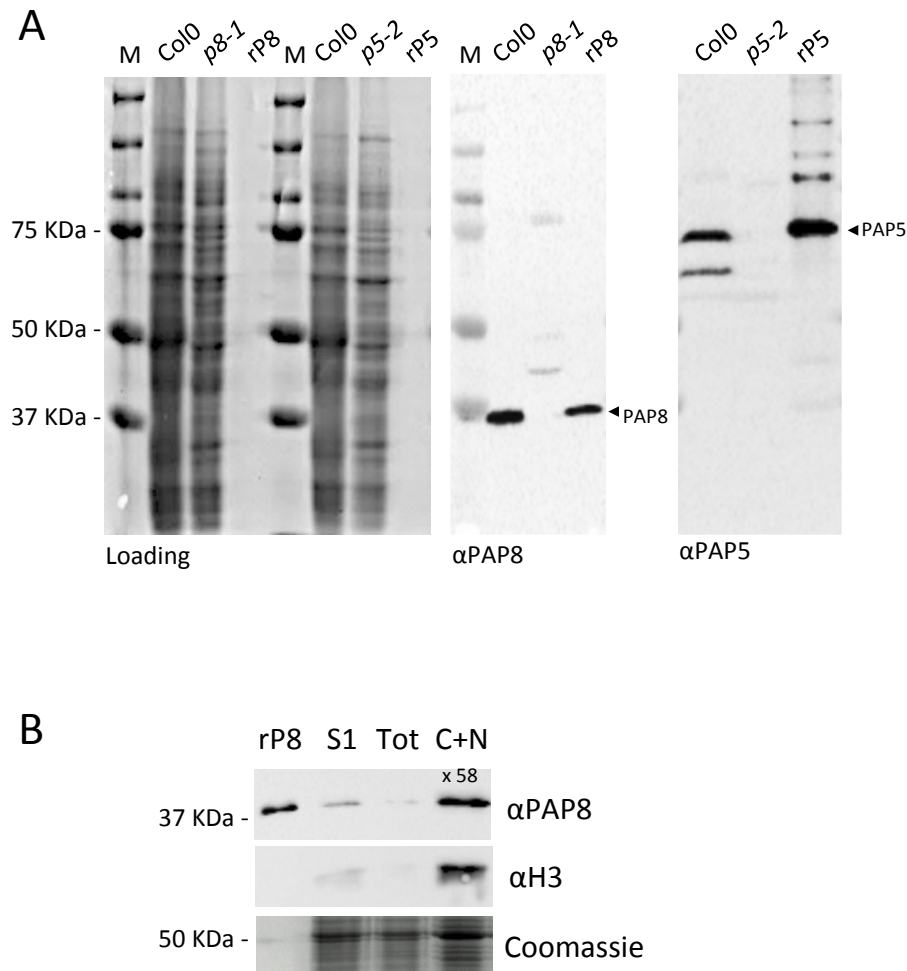

**Appendix Figure S5 | (Related to Figure 3) A Immunoblots showing the levels of PAP8 and PAP5 in Col0, *pap8-1* (*p8-1*) or *pap5-2* (*p5-2*) respectively, using the recombinant proteins PAP8 (rP8) and PAP5 (rP5) as controls. Proteins on SDS-PAGE were detected by instant blue to display equal loading. **B** PAP8 immunodetection in fractions obtained during organelles enrichment; rP8, as above; S1, soluble fraction in the supernatant after centrifugation of the blender-disrupted cellular sample; Tot, total plant extract; C+N, pellet containing organelles, mostly chloroplasts and nuclei separated from S1; H3 antibody used to evaluate nuclear enrichment and a Coomassie staining presented as loading control.**

## Appendix Figure S6

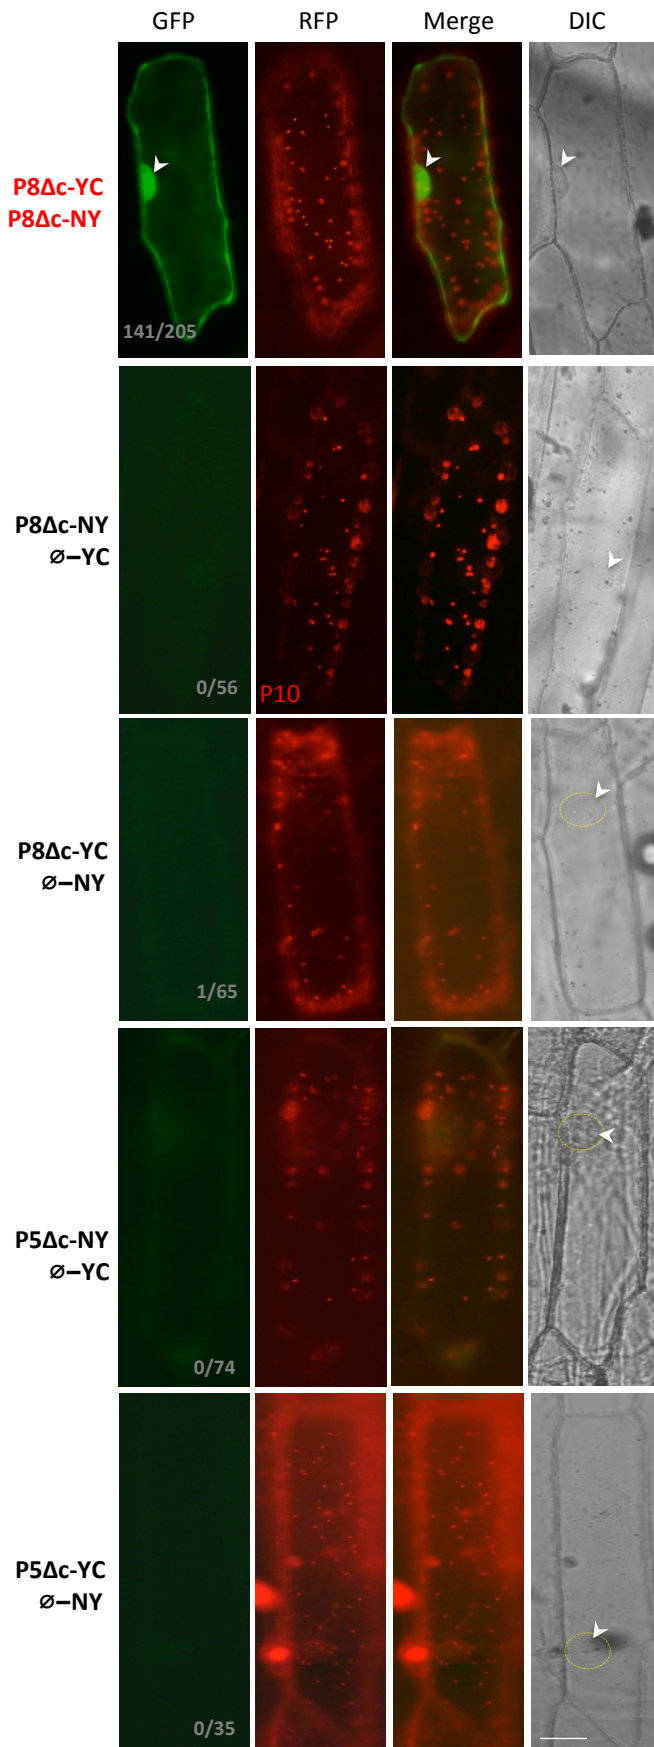

**Appendix Figure S6 | (Related to Fig. 6) Bimolecular fluorescence complementation test.** Using PAP8<sup>ΔcTP</sup>-NY (P8Δc-NY) and PAP5<sup>ΔcTP</sup>-YC (P5Δc-YC) and the reverse combination; PAP8 tested positive using P8Δc-NY with P8Δc-YC.; arrowheads indicate nuclei. P8Δc-NY, P5Δc-NY, P8Δc-YC and P5Δc-YC tested negative using respectively both split YFP fragments alone (∅-YC or ∅-NY). PAP10-RFP (P10-RFP) used as internal control for transfection efficacy knowing YFP signal could be absent. The ratio depicts the number of green-fluorescent cells over red-fluorescent cells. White arrowheads indicate the nuclei and the scale bar equals 20 μm.

## Appendix Figure S7

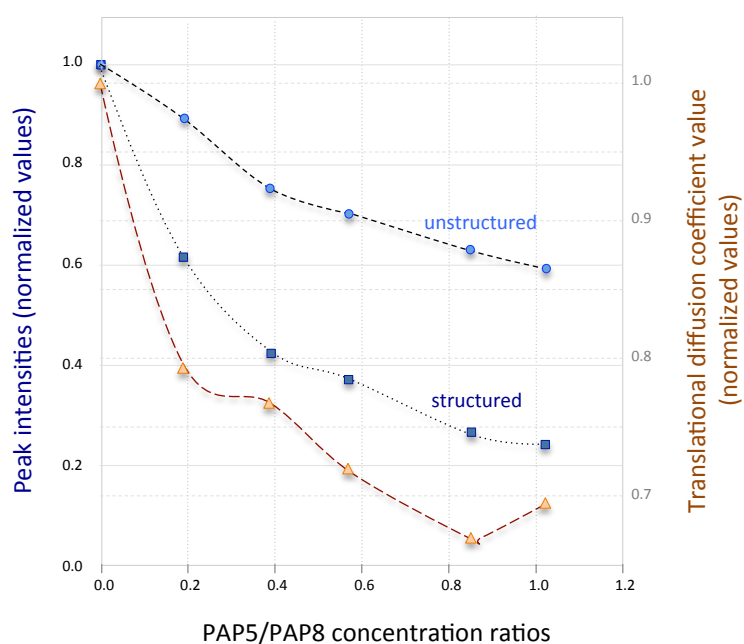

**Appendix Figure S7 | (Related to Fig. 6) Variations of the diffusion coefficient and the peak intensities of PAP8 in function of the PAP5/PAP8 concentration ratios.** Triangles, normalized values of the translational diffusion coefficient of PAP8. Squares, normalized intensities of peaks in the 7.5–8 ppm range (structured). Circles, normalized intensities of peaks outside the 7.5–8 ppm range (unstructured).

Appendix Table S1

| #                                                                       | transgene                    | Plasmid id | bR   | Plant R | genotype                   | Cloning Informations                                                                   |                                  |                                                    |                                           | Comments/Reference                                                               |                          |                                  |                              |                                |                                   |
|-------------------------------------------------------------------------|------------------------------|------------|------|---------|----------------------------|----------------------------------------------------------------------------------------|----------------------------------|----------------------------------------------------|-------------------------------------------|----------------------------------------------------------------------------------|--------------------------|----------------------------------|------------------------------|--------------------------------|-----------------------------------|
|                                                                         |                              |            |      |         |                            | fwd primer id                                                                          | sequence (5'>3')                 | rev primer id                                      | sequence (5'>3')                          |                                                                                  |                          |                                  |                              |                                |                                   |
| <b>A Functional complementation experiment</b>                          |                              |            |      |         |                            |                                                                                        |                                  |                                                    |                                           |                                                                                  |                          |                                  |                              |                                |                                   |
| 1                                                                       | pPAP8::PAP8                  | pBB389     |      |         | p8-1 or hy5-1              | oPAP8orf_FXN                                                                           | ctcagaccATGGGCTCTCCGCCGCTTCTCC   | oPAP8_RXba                                         | tctagaTTAGAACCATTGAGACACTGAAGTCTCG        | All binary vectors in this study derive from pArt27, Gleave <i>et al.</i> , 1992 |                          |                                  |                              |                                |                                   |
| 2                                                                       | pPAP8::PAP8 <sup>NLSm5</sup> | pAI10      |      |         | p8-1                       | oNLSP8mF                                                                               | GGGAGGAGGAGGAGGAGGGGGGGATGACTTGC | oNLSP8mR                                           | GCAAGTATCCCCCATCCCTCTCTCTCTCCC            |                                                                                  |                          |                                  |                              |                                |                                   |
| 3                                                                       | pPAP8::PAP8 <sup>5m5</sup>   | pAI14      | spec | Hygro   |                            | recloned from pKP17 and pKP19 using oPAP8_RXba                                         |                                  |                                                    |                                           |                                                                                  |                          |                                  |                              |                                |                                   |
| 4                                                                       | pPAP8::PAP8 <sup>6to</sup>   | pAI15      |      |         |                            | see pBB346, fc1: tested positive in functional complementation see legend              |                                  |                                                    |                                           |                                                                                  |                          |                                  |                              |                                |                                   |
| 5                                                                       | pPAP8 <sup>72</sup> ::PAP8   | pAI11      |      |         |                            | see pBB380, fc2: tested positive in functional complementation see legend              |                                  |                                                    |                                           |                                                                                  |                          |                                  |                              |                                |                                   |
| 6                                                                       | pPAP8 <sup>97</sup> ::PAP8   | pAI16      |      |         |                            |                                                                                        |                                  |                                                    |                                           |                                                                                  |                          |                                  |                              |                                |                                   |
| 7                                                                       | p35S::PBG                    | pRB1637    |      |         |                            | Kan                                                                                    |                                  | PhyB KpnI SmaI in pEZ5-NL then NotI in pArt27 NotI |                                           |                                                                                  |                          |                                  |                              |                                |                                   |
| <b>B Promoter deletion experiment</b>                                   |                              |            |      |         |                            |                                                                                        |                                  |                                                    |                                           |                                                                                  |                          |                                  |                              |                                |                                   |
| 8                                                                       | pPAP8::GUS (-1133)           | pBB304     |      |         |                            | opPAP8_FSacl                                                                           | gagctccgtttcaactctactgatgac      |                                                    |                                           | Liebers <i>et al.</i> , 2018                                                     |                          |                                  |                              |                                |                                   |
| 9                                                                       | pPAP8::GUS (-909)            | pBB344     |      |         |                            | oP8_F257S                                                                              | gagctccatcgaactgatgaacc          |                                                    |                                           |                                                                                  |                          |                                  |                              |                                |                                   |
| 10                                                                      | pPAP8::GUS (-729)            | pBB345     |      |         |                            | oP8_F729S                                                                              | gagctcgtcagagcaataacaacag        |                                                    |                                           |                                                                                  |                          |                                  |                              |                                |                                   |
| 11                                                                      | pPAP8::GUS (-497)            | pBB349     |      |         |                            | oP8_F497S                                                                              | gagctcggcgaactgaactc             | oP8_RNco                                           | 5'-ccatgggaagcggataaagctcacagag-3'        |                                                                                  |                          |                                  |                              |                                |                                   |
| 12                                                                      | pPAP8::GUS (-257)            | pBB346     | Spec | Hygro   | Col-0                      | oP8_F257S                                                                              | gagctcctaataatcggctcggctcg       |                                                    |                                           |                                                                                  |                          |                                  |                              |                                |                                   |
| 13                                                                      | pPAP8::GUS (-97)             | pBB380     |      |         |                            | oP8_F97_5                                                                              | gagctcatgagctcttaattattcc        |                                                    |                                           |                                                                                  |                          |                                  |                              |                                |                                   |
| 14                                                                      | pPAP8::GUS (+1)              | pBB381     |      |         |                            | oP8_F1_5                                                                               | gagctcattttctcgaatatctatcc       |                                                    |                                           |                                                                                  |                          |                                  |                              |                                |                                   |
| 15                                                                      | pPAP8::GUS (-97m3)           | pBB468     |      |         |                            | oP8_F97mx3                                                                             | gagctcataaaactcttaattattcc       |                                                    |                                           |                                                                                  |                          |                                  |                              |                                |                                   |
| 16                                                                      | pPAP8::GUS (Δ)               | pBB328     |      |         |                            | pBB304 EcoRI HindIII Klenow fill in religated                                          |                                  |                                                    |                                           |                                                                                  |                          |                                  |                              |                                |                                   |
| <b>C trans-activation experiment</b>                                    |                              |            |      |         |                            |                                                                                        |                                  |                                                    |                                           |                                                                                  |                          |                                  |                              |                                |                                   |
| 17                                                                      | p35S::HY5                    | pBB462     |      |         |                            |                                                                                        |                                  |                                                    |                                           | transient expression in onion epidermal cells                                    | oHY5_FXho                | ctcagatGCGAGGAACAAGCGACTAGCTC    | oHY5_RXba                    | tctagaTTAAGGCTTGCATCAGCATAGAAC | *Blanvillain <i>et al.</i> , 2011 |
| 18                                                                      | p35S::HYH                    | pBB473     |      |         |                            |                                                                                        |                                  | oHYH_FXho                                          | ctcagatGTCTCTCAACGACCCCAATGGGAATTCGAGTTCG |                                                                                  | oHYH_RXba                | tctagaTTAGTGATTGTCTACAGTTTAGGC   |                              |                                |                                   |
| 19                                                                      | p35S::TGA2                   | pBB474     |      |         | oTGA2_FXho                 | ctcagatGGCTGATACAGTCCGAG                                                               | oTGA2_RXba                       | tctagaTTACTCTCTGGCTGAGCAAGC                        |                                           |                                                                                  |                          |                                  |                              |                                |                                   |
| 20                                                                      | p35S::bZIP60                 | pBB477     |      |         | obZIP60_F_XN               | ctcagaccATGGCGGAGGAATTTGGAAGC                                                          | obZIP60_R_Xba                    | tctagaTTACGCCCAAGGTTAAGATTGG                       |                                           |                                                                                  |                          |                                  |                              |                                |                                   |
| 21                                                                      | p35S::LAF1                   | pBB493     | carb |         |                            | oLAF1_FXho                                                                             | ctcagatGGCGAAGCAAAATATGG         | oLAF1_RXba                                         | tctagaTTACGCTGTTGTATGATGG                 |                                                                                  |                          |                                  |                              |                                |                                   |
| 22                                                                      | pPAP8::LUC (-1133)           | pBB456     |      |         |                            | The different promoters from pBB304/380/468 were cloned in pLUC* using SacI/NcoI sites |                                  |                                                    |                                           |                                                                                  |                          |                                  |                              |                                |                                   |
| 23                                                                      | pPAP8::LUC (-97)             | pBB457     |      |         |                            |                                                                                        |                                  |                                                    |                                           |                                                                                  |                          |                                  |                              |                                |                                   |
| 24                                                                      | pPAP8::LUC (-97m3)           | pBB458     |      |         |                            |                                                                                        |                                  |                                                    |                                           |                                                                                  |                          |                                  |                              |                                |                                   |
| 25                                                                      | pKar6/pRLC*                  |            |      |         |                            |                                                                                        |                                  |                                                    |                                           |                                                                                  |                          |                                  |                              |                                |                                   |
| <b>D Sub-cellular localisation experiment and complementation tests</b> |                              |            |      |         |                            |                                                                                        |                                  |                                                    |                                           |                                                                                  |                          |                                  |                              |                                |                                   |
| 26                                                                      | pPAP8::O                     | pKP04      | Spec | Hygro   | cloning                    | oNdXNX1                                                                                | catgctcagcagcaggt                | oNdXNX2                                            | ctagaccatgctcgagg                         |                                                                                  |                          |                                  |                              |                                |                                   |
| 27                                                                      | p35S::PAP8ΔCTP-GFP           | pKP15      | carb |         | onion cells                |                                                                                        |                                  |                                                    |                                           |                                                                                  |                          |                                  |                              |                                |                                   |
| 28                                                                      | p35S::PAP8Δnls-GFP           | pKP13      |      |         |                            |                                                                                        |                                  |                                                    |                                           |                                                                                  |                          |                                  |                              |                                |                                   |
| 29                                                                      | p35S::PAP8ΔΔ-GFP             | pKP14      |      |         |                            |                                                                                        |                                  |                                                    |                                           |                                                                                  |                          |                                  |                              |                                |                                   |
| 30                                                                      | p35S::PAP8-GFP               | pKP16      |      |         |                            |                                                                                        |                                  |                                                    |                                           |                                                                                  |                          |                                  |                              |                                |                                   |
| 31                                                                      | p35S::PAP8-GFP               | pKP34      | spec | Hygro   | wt & p8-1                  | oPAP8orf_FXN                                                                           |                                  |                                                    |                                           |                                                                                  |                          |                                  |                              |                                |                                   |
| 32                                                                      | pPAP8::PAP8-GFP              | pKP20      |      |         |                            |                                                                                        |                                  | oPAP8_RBHI                                         | ggatccaagaaccaattgagacactgaagctcgc        |                                                                                  |                          |                                  |                              |                                |                                   |
| 33                                                                      | p35S::PAP8ΔCTP-GFP           | pKP33      |      |         |                            |                                                                                        |                                  | oPAP8ΔCTP_FXho                                     | ctcagatggcgtgagggagggagcgg                |                                                                                  |                          |                                  |                              |                                |                                   |
| 34                                                                      | pPAP8::PAP8Δctp-GFP          | pKP19      |      |         |                            |                                                                                        |                                  |                                                    |                                           |                                                                                  |                          |                                  |                              |                                |                                   |
| 35                                                                      | p35S::PAP8Δnls-GFP           | pKP31      |      |         |                            |                                                                                        |                                  | oPAP8orf_FXN                                       |                                           | oPAP8ΔNLS_PmII                                                                   | caagtcggaactgcaccagaac   |                                  |                              |                                |                                   |
| 36                                                                      | pPAP8::PAP8Δnls-GFP          | pKP17      |      |         |                            |                                                                                        |                                  |                                                    |                                           |                                                                                  |                          |                                  |                              |                                |                                   |
| 37                                                                      | p35S::PAP8ΔΔ-GFP             | pKP32      |      |         |                            |                                                                                        |                                  | oPAP8DCTP_FXho                                     |                                           | oPAP8ΔNLS_PmII                                                                   |                          |                                  |                              |                                |                                   |
| 38                                                                      | pPAP8::PAP8ΔΔ-GFP            | pKP18      |      |         |                            |                                                                                        |                                  |                                                    |                                           |                                                                                  |                          |                                  |                              |                                |                                   |
| 39                                                                      | p35S::PAP8NLSm5-GFP          | pAI09      |      |         |                            |                                                                                        |                                  |                                                    |                                           |                                                                                  |                          |                                  |                              |                                |                                   |
| 40                                                                      | p35S::PAP10-RFP              | pBB301     |      |         |                            | carb                                                                                   |                                  | onion cells                                        | oPAP10orf_xho                             | ctcagatGGCTCTTGTCAATCCAGAAC                                                      | oPAP10orf_BH             | GGATCCCCCATCTGTTGTCAATGATATCGTGC | Pfalz and Pfannschmidt, 2015 |                                |                                   |
| 41                                                                      | pRecA-RFP                    |            |      |         |                            | plastid marker                                                                         |                                  |                                                    |                                           | Cerruti <i>et al.</i> , 1992                                                     |                          |                                  |                              |                                |                                   |
| <b>E Split YFP experiment</b>                                           |                              |            |      |         |                            |                                                                                        |                                  |                                                    |                                           |                                                                                  |                          |                                  |                              |                                |                                   |
| 42                                                                      | p35S::PAP8ΔCTP-YC            | pRT12      | carb |         | onion cells                |                                                                                        |                                  |                                                    |                                           |                                                                                  |                          |                                  |                              |                                |                                   |
| 43                                                                      | p35S::PAP8ΔCTP-NY            | pSCO1      |      |         |                            | GFP replaced by NY-YFP in pKP15                                                        |                                  |                                                    |                                           |                                                                                  |                          |                                  |                              |                                |                                   |
| 44                                                                      | p35S::PAP5ΔCTP-YC            | pRT13      |      |         |                            |                                                                                        |                                  |                                                    |                                           |                                                                                  |                          |                                  |                              |                                |                                   |
| 45                                                                      | p35S::PAP5ΔCTP-NY            | pBB526     |      |         |                            |                                                                                        |                                  | oP5DCTP_FX                                         | ctcagatGATGACAGACAGTGGAAAGTCCAG           | oP5_RBH                                                                          | GGATCCAGGATCAGTCTCTCTCTC |                                  |                              |                                |                                   |
| 46                                                                      | p35S::YC                     | pBB336     |      |         |                            |                                                                                        |                                  |                                                    |                                           |                                                                                  |                          |                                  |                              |                                |                                   |
| 47                                                                      | p35S::NY                     | pBB335     |      |         |                            |                                                                                        |                                  |                                                    |                                           |                                                                                  |                          |                                  |                              |                                |                                   |
| <b>F Protein Production</b>                                             |                              |            |      |         |                            |                                                                                        |                                  |                                                    |                                           |                                                                                  |                          |                                  |                              |                                |                                   |
| 40                                                                      | HY5-H6                       | pBB543     | carb |         | for expression in Rosetta2 | oHY5fl_Fnco                                                                            | ccatggcgaggagaacaagcagactctc     | oHY5_Rnot                                          | ggcgccgaagcttgcacagcattagaacc             | NcoI NotI in pEt21d                                                              |                          |                                  |                              |                                |                                   |
| 41                                                                      | PAP8Δctp-H6                  | pAG21d     |      |         |                            | oPap8_Fnco                                                                             | ccatggcgctgatgagggagcggagc       | oPap8_Rnot                                         | ggcgccgaaccaattgagacactgaagctcgc          | NcoI NotI in pET-M41                                                             |                          |                                  |                              |                                |                                   |
| 42                                                                      | H6-MBP-PAP5Δctp-H6           | pAG08      | kan  |         |                            | oPAP5_Fnco                                                                             | ccatggcgacagcagtgaaagctccag      | oPAP5_Rnot                                         | ggcgccgagatcagctctctcaagctcc              | NcoI NotI in pET-M41                                                             |                          |                                  |                              |                                |                                   |
| 43                                                                      | MBP                          | pET-M40    |      |         |                            |                                                                                        |                                  |                                                    |                                           |                                                                                  |                          |                                  |                              |                                |                                   |

**Table S1| Plasmid overview and the primers used for their cloning.** (bR: bacterial resistance to antibiotics; carb, carbenicillin; kan, kanamycin; spec, spectinomycin. PlantR, plant resistance used as the selection marker and brought by the binary vector: Hygro, hygromycin. Genotype used for this study: Col-0 or wt, wild type Columbia; p8-1, heterogeneous progeny from individual heterozygotes pap8-1/+ used for transformation. Primers are given from 5' to 3'. n.a. not applicable. fc1 and fc2, each promoter driving PAP8 coding sequence (TG) was tested in functional complementation: two lines doubly heterozygous pap8-1/+; TG- segregated around 1/16-albino plants. (fc1) p8-27::PAP8, Line 1 (n=95,  $\epsilon=0.76 < 1.96$ ); Line 2 (n=62,  $\epsilon=0.06 < 1.96$ ). (fc2) p8-97::PAP8, Line 1: n=389,  $\epsilon=0.34 < 1.96$ ; Line 2: n=392,  $\epsilon=0.32 < 1.96$  (e-test,  $\alpha=0.05$ ; Fisher Yates).

**Appendix Table S2**

| Position | Matrix ID         | Family                | Strand | Similar Score | Hit Sequence           | TF ID or Motif name                                                                                                                                                                                                                                                                                                                                                                                                                  | Gene name |
|----------|-------------------|-----------------------|--------|---------------|------------------------|--------------------------------------------------------------------------------------------------------------------------------------------------------------------------------------------------------------------------------------------------------------------------------------------------------------------------------------------------------------------------------------------------------------------------------------|-----------|
| -492     | TF_motif_seq_0257 | NF-YB;NF-YA;NF-YC     | +      | 0.8           | GCAAT                  | AT1G09030;AT1G17590;AT1G21970;AT1G30500;AT1G54160;AT1G54830;AT1G56170;AT1G72830;AT2G38880;AT2G47810;AT3G05690;AT3G14020;AT3G20910;AT3G53340;AT4G14540;AT5G06510;AT5G12840;AT5G27910;AT5G38140;AT5G47640;AT5G47670;AT1G09030;AT1G17590;AT1G21970;AT1G30500;AT1G54160;AT1G54830;AT1G56170;AT1G72830;AT2G38880;AT2G47810;AT3G05690;AT3G14020;AT3G20910;AT3G53340;AT4G14540;AT5G06510;AT5G12840;AT5G27910;AT5G38140;AT5G47640;AT5G47670; |           |
| -489     | TF_motif_seq_0257 | NF-YB;NF-YA;NF-YC     | -      | 0.8           | ATTCG                  | AT1G09030;AT1G17590;AT1G21970;AT1G30500;AT1G54160;AT1G54830;AT1G56170;AT1G72830;AT2G38880;AT2G47810;AT3G05690;AT3G14020;AT3G20910;AT3G53340;AT4G14540;AT5G06510;AT5G12840;AT5G27910;AT5G38140;AT5G47640;AT5G47670;                                                                                                                                                                                                                   |           |
| -485     | TF_motif_seq_0267 | Trihelix              | -      | 0.8           | GAAAC                  | AT5G01380                                                                                                                                                                                                                                                                                                                                                                                                                            |           |
| -485     | TF_motif_seq_0261 | (Motif sequence only) | +      | 0.8           | GAAAC                  | SURECOREATSULTR11                                                                                                                                                                                                                                                                                                                                                                                                                    |           |
| -484     | FmatrixID_1238    | MYB-related           | +      | 0.96          | aaactcaaggtTAGGgtagc   | AT1G72740                                                                                                                                                                                                                                                                                                                                                                                                                            |           |
| -481     | TF_motif_seq_0275 | (Motif sequence only) | +      | 0.8           | CTCAA                  | WBXATNPR1                                                                                                                                                                                                                                                                                                                                                                                                                            |           |
| -478     | TF_motif_seq_0239 | Dof                   | +      | 1             | AAGGT                  | AT1G29160;AT1G64620;AT2G37590;AT3G21270;AT3G45610;AT3G47500;AT4G38000;AT5G39660;AT5G60200;AT5G60850;AT5G62940;AT2G46590;AT1G07640;AT1G21340;AT1G26790;AT1G47655;AT1G51700;AT1G69570;AT2G28510;AT2G28810;AT2G34140;AT3G50410;AT3G55370;AT3G61850;AT4G00940;AT4G21050;AT4G21080;AT4G24060;                                                                                                                                             |           |
| -478     | FmatrixID_1150    | Myb/SANT; MYB         | -      | 0.89          | aaggTTAGGgtagc         | AT1G68320                                                                                                                                                                                                                                                                                                                                                                                                                            |           |
| -478     | FmatrixID_1160    | Myb/SANT; MYB         | +      | 0.86          | aaggTTAGGgtagc         | AT1G25340                                                                                                                                                                                                                                                                                                                                                                                                                            |           |
| -478     | FmatrixID_1254    | Myb/SANT; MYB-related | -      | 0.95          | aaggtTAGGgtagcattc     | AT5G67580                                                                                                                                                                                                                                                                                                                                                                                                                            |           |
| -477     | FmatrixID_1259    | MYB-related           | -      | 0.93          | aggtTAGGgtagc          | AT1G72740                                                                                                                                                                                                                                                                                                                                                                                                                            |           |
| -477     | FmatrixID_1271    | Myb/SANT; MYB-related | +      | 0.93          | aggtTAGGgtagcattc      | AT5G67580                                                                                                                                                                                                                                                                                                                                                                                                                            |           |
| -477     | TF_motif_seq_0366 | (Motif sequence only) | -      | 0.86          | agTTAG                 | MYBATRD22                                                                                                                                                                                                                                                                                                                                                                                                                            |           |
| -476     | FmatrixID_1555    | MYB                   | -      | 0.88          | ggTTAGGg               | AT3G01530                                                                                                                                                                                                                                                                                                                                                                                                                            |           |
| -475     | TF_motif_seq_0267 | Trihelix              | +      | 0.8           | GTTAG                  | AT5G01380                                                                                                                                                                                                                                                                                                                                                                                                                            |           |
| -474     | FmatrixID_0306    | MADF; Trihelix        | -      | 1             | ttagGGTtag             | AT3G25990                                                                                                                                                                                                                                                                                                                                                                                                                            |           |
| -474     | FmatrixID_0363    | Myb/SANT; MYB-related | +      | 0.97          | tTAGGGtt               | AT3G49850;AT5G67580                                                                                                                                                                                                                                                                                                                                                                                                                  |           |
| -474     | FmatrixID_1531    | Myb/SANT; MYB-related | +      | 0.98          | tTAGGGtt               | AT5G67580                                                                                                                                                                                                                                                                                                                                                                                                                            |           |
| -471     | TF_motif_seq_0366 | (Motif sequence only) | -      | 0.86          | ggTTAG                 | MYBATRD22                                                                                                                                                                                                                                                                                                                                                                                                                            |           |
| -469     | TF_motif_seq_0267 | Trihelix              | +      | 0.8           | GTTAG                  | AT5G01380                                                                                                                                                                                                                                                                                                                                                                                                                            |           |
| -463     | TF_motif_seq_0241 | ZF-HD                 | +      | 1             | ATTAG                  | AT1G75240                                                                                                                                                                                                                                                                                                                                                                                                                            |           |
| -463     | TF_motif_seq_0257 | NF-YB;NF-YA;NF-YC     | -      | 0.8           | ATTAG                  | AT1G09030;AT1G17590;AT1G21970;AT1G30500;AT1G54160;AT1G54830;AT1G56170;AT1G72830;AT2G38880;AT2G47810;AT3G05690;AT3G14020;AT3G20910;AT3G53340;AT4G14540;AT5G06510;AT5G12840;AT5G27910;AT5G38140;AT5G47640;AT5G47670;                                                                                                                                                                                                                   |           |
| -458     | TF_motif_seq_0261 | (Motif sequence only) | -      | 0.8           | GAGGC                  | SURECOREATSULTR11                                                                                                                                                                                                                                                                                                                                                                                                                    |           |
| -458     | TF_motif_seq_0263 | (Motif sequence only) | -      | 0.8           | GAGGC                  | SORLP1AT                                                                                                                                                                                                                                                                                                                                                                                                                             |           |
| -456     | TF_motif_seq_0258 | Dehydrin              | -      | 0.8           | GGCGG                  | U01377                                                                                                                                                                                                                                                                                                                                                                                                                               |           |
| -455     | TF_motif_seq_0331 | TCP                   | -      | 0.95          | gCGGGT                 | AT3G27010                                                                                                                                                                                                                                                                                                                                                                                                                            |           |
| -454     | TF_motif_seq_0251 | TCP                   | +      | 1             | CGGGT                  | AT3G27010                                                                                                                                                                                                                                                                                                                                                                                                                            |           |
| -453     | TF_motif_seq_0265 | (Motif sequence only) | +      | 0.8           | GGGTC                  | SORLP2AT                                                                                                                                                                                                                                                                                                                                                                                                                             |           |
| -451     | TF_motif_seq_0258 | Dehydrin              | -      | 1             | GTCGG                  | U01377                                                                                                                                                                                                                                                                                                                                                                                                                               |           |
| -451     | TF_motif_seq_0292 | AP2; ERF;ERF          | -      | 0.95          | GTCGGg                 | AT1G12610;AT1G63030;AT1G75490;AT3G57600;AT4G25470;AT4G25480;AT4G25490;                                                                                                                                                                                                                                                                                                                                                               |           |
| -451     | FmatrixID_1208    | Myb/SANT; MYB         | +      | 0.92          | gtcgggAACCGaagc        | AT5G05410;AT5G18450;AT5G51990;AT2G38340;AT3G11020                                                                                                                                                                                                                                                                                                                                                                                    |           |
| -447     | TF_motif_seq_0267 | Trihelix              | -      | 0.8           | GGAAC                  | AT2G32460                                                                                                                                                                                                                                                                                                                                                                                                                            |           |
| -445     | TF_motif_seq_0248 | (Motif sequence only) | +      | 0.8           | AACCG                  | AT5G01380                                                                                                                                                                                                                                                                                                                                                                                                                            |           |
| -443     | TF_motif_seq_0258 | Dehydrin              | +      | 0.8           | CCGAA                  | MYBCREATCYCB1                                                                                                                                                                                                                                                                                                                                                                                                                        |           |
| -439     | FmatrixID_1264    | Myb/SANT              | +      | 0.64          | agcgaTAAACcattgacttacc | U01377                                                                                                                                                                                                                                                                                                                                                                                                                               |           |
| -438     | FmatrixID_0131    | AT-Hook               | +      | 1             | gccgATAAA              | AT5G59430                                                                                                                                                                                                                                                                                                                                                                                                                            |           |
| -437     | TF_motif_seq_0257 | NF-YB;NF-YA;NF-YC     | +      | 0.8           | CCGAT                  | AT1G19485;AT1G48610                                                                                                                                                                                                                                                                                                                                                                                                                  |           |
| -437     | TF_motif_seq_0258 | Dehydrin              | +      | 0.8           | CCGAT                  | AT1G09030;AT1G17590;AT1G21970;AT1G30500;AT1G54160;AT1G54830;AT1G56170;AT1G72830;AT2G38880;AT2G47810;AT3G05690;AT3G14020;AT3G20910;AT3G53340;AT4G14540;AT5G06510;AT5G12840;AT5G27910;AT5G38140;AT5G47640;AT5G47670;                                                                                                                                                                                                                   |           |
| -437     | TF_motif_seq_0248 | (Motif sequence only) | -      | 0.8           | CCGAT                  | MYBCREATCYCB1                                                                                                                                                                                                                                                                                                                                                                                                                        |           |
| -436     | TF_motif_seq_0237 | GATA; tbfy            | +      | 1             | CGATA                  | AT1G51600;AT2G45050;AT3G06740;AT3G16870;AT3G21175;AT3G24050;AT3G54810;AT3G60530;AT4G17570;AT4G24470;AT4G26150;AT4G32890;AT4G34680;AT5G25830;AT5G26930;AT5G56860;AT5G66320;AT2G18380;AT3G50870;AT4G36260                                                                                                                                                                                                                              |           |
| -435     | TF_motif_seq_0243 | GATA; tbfy            | +      | 1             | GATAA                  | AT1G51600;AT2G45050;AT3G06740;AT3G16870;AT3G21175;AT3G24050;AT3G54810;AT3G60530;AT4G17570;AT4G24470;AT4G26150;AT4G32890;AT4G34680;AT5G25830;                                                                                                                                                                                                                                                                                         |           |
| -435     | TF_motif_seq_0321 | (Motif sequence only) | +      | 1             | GATAAa                 | AT5G26930;AT5G56860;AT5G66320;AT2G18380;AT3G50870;AT4G36260;                                                                                                                                                                                                                                                                                                                                                                         |           |
| -433     | FmatrixID_1491    | WRKY                  | +      | 0.84          | taaaccaTTGACcttcagg    | GT1CONSENSUS                                                                                                                                                                                                                                                                                                                                                                                                                         |           |
| -433     | FmatrixID_1500    | WRKY                  | -      | 0.88          | taaaccaTTGACctt        | AT4G01720                                                                                                                                                                                                                                                                                                                                                                                                                            |           |
| -432     | TF_motif_seq_0341 | (Motif sequence only) | +      | 1             | aAACCA                 | MYBIAT                                                                                                                                                                                                                                                                                                                                                                                                                               |           |
| -431     | FmatrixID_1733    | WRKY                  | +      | 0.89          | aaccaTTGACctt          | AT2G04880                                                                                                                                                                                                                                                                                                                                                                                                                            |           |
| -431     | FmatrixID_1736    | WRKY                  | -      | 0.88          | aaccaTTGACctt          | AT2G04880                                                                                                                                                                                                                                                                                                                                                                                                                            |           |
| -430     | FmatrixID_0461    | WRKY                  | -      | 0.93          | accaTTGACctt           | AT1G18860;AT1G29280;AT1G62300;AT1G64000;AT1G66550;AT1G66560;AT1G68150;AT1G80590;AT2G34830;AT2G40740;AT2G40750;AT2G44745;AT2G46400;AT3G01970;AT3G04670;AT3G56400;AT3G58710;AT3G62340;AT4G04450;AT4G11070;AT4G22070;AT4G23810;AT4G24240;AT4G39410;AT5G15130;AT5G22570;AT5G26170;AT5G262170;                                                                                                                                            |           |
| -430     | FmatrixID_1443    | WRKY                  | -      | 0.84          | accaTTGACctta          | AT4G01250                                                                                                                                                                                                                                                                                                                                                                                                                            |           |
| -430     | FmatrixID_1445    | WRKY                  | -      | 0.81          | accaTTGACcttcacc       | AT5G46350                                                                                                                                                                                                                                                                                                                                                                                                                            |           |
| -430     | FmatrixID_1451    | WRKY                  | +      | 0.82          | accaTTGACctta          | AT4G01250                                                                                                                                                                                                                                                                                                                                                                                                                            |           |
| -430     | FmatrixID_1462    | WRKY                  | -      | 0.83          | accaTTGACctta          | AT1G30650                                                                                                                                                                                                                                                                                                                                                                                                                            |           |
| -430     | FmatrixID_1478    | WRKY                  | +      | 0.93          | accaTTGACctta          | AT4G26640                                                                                                                                                                                                                                                                                                                                                                                                                            |           |
| -430     | FmatrixID_1484    | WRKY                  | +      | 0.87          | accaTTGACcttac         | AT2G46130                                                                                                                                                                                                                                                                                                                                                                                                                            |           |
| -430     | FmatrixID_1734    | WRKY                  | -      | 0.89          | accaTTGACctta          | AT2G04880                                                                                                                                                                                                                                                                                                                                                                                                                            |           |
| -430     | FmatrixID_1735    | WRKY                  | -      | 0.92          | accaTTGACctta          | AT2G04880                                                                                                                                                                                                                                                                                                                                                                                                                            |           |
| -430     | FmatrixID_1737    | WRKY                  | -      | 0.89          | accaTTGACctta          | AT2G04880                                                                                                                                                                                                                                                                                                                                                                                                                            |           |
| -430     | FmatrixID_1738    | WRKY                  | +      | 0.88          | accaTTGACctta          | AT2G04880                                                                                                                                                                                                                                                                                                                                                                                                                            |           |
| -430     | FmatrixID_1739    | WRKY                  | +      | 0.94          | accaTTGACctta          | AT2G04880                                                                                                                                                                                                                                                                                                                                                                                                                            |           |
| -430     | FmatrixID_1740    | WRKY                  | -      | 0.91          | accaTTGACctta          | AT2G04880                                                                                                                                                                                                                                                                                                                                                                                                                            |           |
| -429     | FmatrixID_0446    | WRKY                  | -      | 0.98          | ccaTTGACctt            | AT1G18860;AT1G29280;AT1G62300;AT1G64000;AT1G66550;AT1G66560;AT1G68150;AT1G80590;AT2G34830;AT2G40740;AT2G40750;AT2G44745;AT2G46400;AT3G01970;AT3G04670;AT3G56400;AT3G58710;AT3G62340;AT4G04450;AT4G11070;AT4G22070;AT4G23810;AT4G24240;AT4G39410;AT5G15130;AT5G22570;AT5G26170;AT5G262170;                                                                                                                                            |           |
| -429     | FmatrixID_0448    | WRKY                  | -      | 0.97          | ccaTTGACctt            | AT1G18860;AT1G29280;AT1G62300;AT1G64000;AT1G66550;AT1G66560;AT1G68150;AT1G80590;AT2G34830;AT2G40740;AT2G40750;AT2G44745;AT2G46400;AT3G01970;AT3G04670;AT3G56400;AT3G58710;AT3G62340;AT4G04450;AT4G11070;AT4G22070;AT4G23810;AT4G24240;AT4G39410;AT5G15130;AT5G22570;AT5G26170;AT5G262170;                                                                                                                                            |           |
| -429     | FmatrixID_0455    | WRKY                  | -      | 0.92          | ccaTTGACctt            | AT1G18860;AT1G29280;AT1G62300;AT1G64000;AT1G66550;AT1G66560;AT1G68150;AT1G80590;AT2G34830;AT2G40740;AT2G40750;AT2G44745;AT2G46400;AT3G01970;AT3G04670;AT3G56400;AT3G58710;AT3G62340;AT4G04450;AT4G11070;AT4G22070;AT4G23810;AT4G24240;AT4G39410;AT5G15130;AT5G22570;AT5G26170;AT5G262170;                                                                                                                                            |           |
| -429     | FmatrixID_0457    | WRKY                  | -      | 0.97          | ccaTTGACctt            | AT1G18860;AT1G29280;AT1G62300;AT1G64000;AT1G66550;AT1G66560;AT1G68150;AT1G80590;AT2G34830;AT2G40740;AT2G40750;AT2G44745;AT2G46400;AT3G01970;AT3G04670;AT3G56400;AT3G58710;AT3G62340;AT4G04450;AT4G11070;AT4G22070;AT4G23810;AT4G24240;AT4G39410;AT5G15130;AT5G22570;AT5G26170;AT5G262170;                                                                                                                                            |           |
| -429     | FmatrixID_0629    | WRKY                  | +      | 0.92          | ccaTTGACctt            | AT4G18170;AT4G22070;AT4G23810;AT4G24240;AT4G31550;AT4G39410;AT5G15130;                                                                                                                                                                                                                                                                                                                                                               |           |
| -429     | FmatrixID_0631    | WRKY                  | +      | 0.9           | ccaTTGACctt            | AT2G44745                                                                                                                                                                                                                                                                                                                                                                                                                            |           |
| -429     | TF_motif_seq_0257 | NF-YB;NF-YA;NF-YC     | +      | 0.8           | CCATT                  | AT5G22570                                                                                                                                                                                                                                                                                                                                                                                                                            |           |
| -429     | FmatrixID_1481    | WRKY                  | -      | 0.86          | ccaTTGACcttacc         | AT1G09030;AT1G17590;AT1G21970;AT1G30500;AT1G54160;AT1G54830;AT1G56170;AT1G72830;AT2G38880;AT2G47810;AT3G05690;AT3G14020;AT3G20910;AT3G53340;AT4G14540;AT5G06510;AT5G12840;AT5G27910;AT5G38140;AT5G47640;AT5G47670;                                                                                                                                                                                                                   |           |
| -429     | FmatrixID_1742    | WRKY                  | -      | 0.9           | ccaTTGACcttacc         | AT2G46130                                                                                                                                                                                                                                                                                                                                                                                                                            |           |
| -429     | TF_motif_seq_0248 | (Motif sequence only) | -      | 0.8           | CCATT                  | AT2G04880                                                                                                                                                                                                                                                                                                                                                                                                                            |           |
| -428     | FmatrixID_0382    | NAC; NAM              | -      | 1             | caTTGACctt             | MYBCREATCYCB1                                                                                                                                                                                                                                                                                                                                                                                                                        |           |
| -428     | FmatrixID_0458    | WRKY                  | -      | 1             | caTTGACctt             | AT1G01720;AT1G52880;AT1G52890;AT1G69490;AT3G04070;AT3G15500;AT3G15510;AT1G18860;AT1G29280;AT1G29860;AT1G55600;AT1G62300;AT1G64000;AT1G66150;AT1G66810;AT2G21900;AT2G34830;AT2G40740;AT2G44745;AT2G46400;AT3G01970;AT3G04670;AT3G58710;AT3G62340;AT4G04450;AT4G11070;AT4G18170;AT4G22070;AT4G23810;AT4G24240;AT4G39410;AT5G15130;AT5G22570;AT5G26170;AT5G262170;                                                                      |           |
| -428     | FmatrixID_0463    | WRKY                  | -      | 1             | caTTGACctt             | AT1G18860;AT1G29280;AT1G29860;AT1G55600;AT1G62300;AT1G64000;AT1G66150;AT1G66810;AT2G21900;AT2G34830;AT2G40740;AT2G44745;AT2G46400;AT3G01970;AT3G04670;AT3G58710;AT3G62340;AT4G04450;AT4G11070;AT4G18170;AT4G22070;AT4G23810;AT4G24240;AT4G39410;AT5G15130;AT5G22570;AT5G26170;AT5G262170;                                                                                                                                            |           |

|      |                 |                       |   |      |                     |                                                                                                                                                                                                                                                                                                                                                                                                                                                                                                                                                                                                                                                                                                                                                                                                                                                                                                                                                                                                                                                                                                                                             |
|------|-----------------|-----------------------|---|------|---------------------|---------------------------------------------------------------------------------------------------------------------------------------------------------------------------------------------------------------------------------------------------------------------------------------------------------------------------------------------------------------------------------------------------------------------------------------------------------------------------------------------------------------------------------------------------------------------------------------------------------------------------------------------------------------------------------------------------------------------------------------------------------------------------------------------------------------------------------------------------------------------------------------------------------------------------------------------------------------------------------------------------------------------------------------------------------------------------------------------------------------------------------------------|
| -428 | TfmatrixID_0466 | WRKY                  | - | 0.99 | caTTGACcct          | AT1G18860;AT1G29280;AT1G29860;AT1G55600;AT1G62300;AT1G64000;AT1G68150;<br>AT1G69810;AT2G21900;AT2G34830;AT2G44745;AT3G01970;AT3G04670;AT3G58710;<br>AT3G62340;AT4G04450;AT4G18170;AT4G22070;AT4G24240;AT4G39410;AT5G15130;<br>AT1G18860;AT1G29280;AT1G29860;AT1G55600;AT1G62300;AT1G64000;AT1G66550;<br>AT1G66560;AT1G68150;AT1G69810;AT1G80590;AT2G21900;AT2G34830;AT2G40740;<br>AT2G40750;AT2G44745;AT2G46400;AT3G01970;AT3G04670;AT3G55640;AT3G58710;<br>AT3G62340;AT4G04450;AT4G11070;AT4G18170;AT4G22070;AT4G223810;AT4G24240;<br>AT4G31800<br>AT2G23320<br>AT1G29860<br>AT2G30590<br>AT2G46400                                                                                                                                                                                                                                                                                                                                                                                                                                                                                                                                        |
| -427 | TfmatrixID_0445 | WRKY                  | - | 1    | aTTGACct            | AT1G18860;AT1G29280;AT1G29860;AT1G55600;AT1G62300;AT1G64000;AT1G68150;<br>AT1G69810;AT1G80840;AT2G21900;AT2G34830;AT2G44745;AT3G01970;AT3G04670;<br>AT3G58710;AT3G62340;AT4G04450;AT4G18170;AT4G22070;AT4G24240;AT4G39410;<br>AT1G13960;AT2G03340;AT2G37260;AT3G01080;AT4G12020;AT4G26640;AT4G26640;<br>AT4G30935;AT5G07100;AT5G56270<br>AT1G09030;AT1G17590;AT1G21970;AT1G30500;AT1G54160;AT1G54830;AT1G56170;<br>AT1G72830;AT2G38880;AT2G47810;AT3G05690;AT3G14020;AT3G20910;AT3G53340;<br>AT4G14540;AT5G06510;AT5G12840;AT5G27910;AT5G38140;AT5G47640;AT5G47670;<br>AT1G13960;AT2G03340;AT2G04880;AT2G37260;AT3G01080;AT4G12020;AT4G26640;<br>AT4G26640;AT4G30935;AT5G07100                                                                                                                                                                                                                                                                                                                                                                                                                                                              |
| -427 | TfmatrixID_0465 | WRKY                  | - | 0.98 | aTTGACct            | AT1G13960;AT1G18860;AT1G29280;AT1G29860;AT1G30650;AT1G55600;AT1G62300;<br>AT1G64000;AT1G66550;AT1G68150;AT1G69310;AT1G69810;AT1G80590;AT1G80840;<br>AT2G03340;AT2G23320;AT2G24570;AT2G25000;AT2G30250;AT2G30590;AT2G34830;<br>AT2G37260;AT2G38470;AT2G40740;AT2G40750;AT2G44745;AT2G46130;AT2G46400;<br>AT2G47260;AT3G01080;AT3G01970;AT3G04670;AT3G56400;AT3G58710;AT4G01250;<br>AT4G01720;AT4G04450;AT4G12020;AT4G18170;AT4G22070;AT4G23810;AT4G24240;<br>AT4G26440;AT4G26640;AT4G30935;AT4G31550;AT4G31800;AT4G39410;AT5G07100;<br>WBXATNPR1                                                                                                                                                                                                                                                                                                                                                                                                                                                                                                                                                                                             |
| -426 | TfmatrixID_0534 | WRKY                  | - | 0.88 | TTGACctacc          | AT1G23380;AT1G62360;AT1G70510;AT4G08150<br>AT1G13960;AT1G18860;AT1G29280;AT1G29860;AT1G30650;AT1G55600;AT1G62300;<br>AT1G64000;AT1G66550;AT1G68150;AT1G69310;AT1G69810;AT1G80590;AT1G80840;<br>AT2G03340;AT2G23320;AT2G24570;AT2G25000;AT2G30250;AT2G30590;AT2G34830;<br>AT2G37260;AT2G38470;AT2G40740;AT2G40750;AT2G44745;AT2G46130;AT2G46400;<br>AT2G47260;AT3G01080;AT3G01970;AT3G04670;AT3G56400;AT3G58710;AT4G01250;<br>AT4G01720;AT4G04450;AT4G12020;AT4G18170;AT4G22070;AT4G23810;AT4G24240;<br>AT4G26440;AT4G26640;AT4G30935;AT4G31550;AT4G31800;AT4G39410;AT5G07100;<br>WBXATNPR1                                                                                                                                                                                                                                                                                                                                                                                                                                                                                                                                                  |
| -425 | TfmatrixID_0271 | WRKY                  | + | 1    | TTGACc              | AT1G23380;AT1G62360;AT1G70510;AT4G08150<br>AT1G13960;AT1G18860;AT1G29280;AT1G29860;AT1G30650;AT1G55600;AT1G62300;<br>AT1G64000;AT1G66550;AT1G68150;AT1G69310;AT1G69810;AT1G80590;AT1G80840;<br>AT2G03340;AT2G23320;AT2G24570;AT2G25000;AT2G30250;AT2G30590;AT2G34830;<br>AT2G37260;AT2G38470;AT2G40740;AT2G40750;AT2G44745;AT2G46130;AT2G46400;<br>AT2G47260;AT3G01080;AT3G01970;AT3G04670;AT3G56400;AT3G58710;AT4G01250;<br>AT4G01720;AT4G04450;AT4G12020;AT4G18170;AT4G22070;AT4G23810;AT4G24240;<br>AT4G26440;AT4G26640;AT4G30935;AT4G31550;AT4G31800;AT4G39410;AT5G07100;<br>WBXATNPR1                                                                                                                                                                                                                                                                                                                                                                                                                                                                                                                                                  |
| -425 | TfmatrixID_0271 | bZIP                  | + | 0.8  | TGACC               | AT1G23380;AT1G62360;AT1G70510;AT4G08150<br>AT1G13960;AT1G18860;AT1G29280;AT1G29860;AT1G30650;AT1G55600;AT1G62300;<br>AT1G64000;AT1G66550;AT1G68150;AT1G69310;AT1G69810;AT1G80590;AT1G80840;<br>AT2G03340;AT2G23320;AT2G24570;AT2G25000;AT2G30250;AT2G30590;AT2G34830;<br>AT2G37260;AT2G38470;AT2G40740;AT2G40750;AT2G44745;AT2G46130;AT2G46400;<br>AT2G47260;AT3G01080;AT3G01970;AT3G04670;AT3G56400;AT3G58710;AT4G01250;<br>AT4G01720;AT4G04450;AT4G12020;AT4G18170;AT4G22070;AT4G23810;AT4G24240;<br>AT4G26440;AT4G26640;AT4G30935;AT4G31550;AT4G31800;AT4G39410;AT5G07100;<br>WBXATNPR1                                                                                                                                                                                                                                                                                                                                                                                                                                                                                                                                                  |
| -425 | TfmatrixID_0450 | (Motif sequence only) | + | 0.75 | TGACctta            | AT1G23380;AT1G62360;AT1G70510;AT4G08150<br>AT1G13960;AT1G18860;AT1G29280;AT1G29860;AT1G30650;AT1G55600;AT1G62300;<br>AT1G64000;AT1G66550;AT1G68150;AT1G69310;AT1G69810;AT1G80590;AT1G80840;<br>AT2G03340;AT2G23320;AT2G24570;AT2G25000;AT2G30250;AT2G30590;AT2G34830;<br>AT2G37260;AT2G38470;AT2G40740;AT2G40750;AT2G44745;AT2G46130;AT2G46400;<br>AT2G47260;AT3G01080;AT3G01970;AT3G04670;AT3G56400;AT3G58710;AT4G01250;<br>AT4G01720;AT4G04450;AT4G12020;AT4G18170;AT4G22070;AT4G23810;AT4G24240;<br>AT4G26440;AT4G26640;AT4G30935;AT4G31550;AT4G31800;AT4G39410;AT5G07100;<br>WBXATNPR1                                                                                                                                                                                                                                                                                                                                                                                                                                                                                                                                                  |
| -423 | TfmatrixID_0239 | Dof                   | - | 1    | ACCTT               | AT1G29160;AT1G64620;AT2G37590;AT3G21270;AT3G45610;AT3G47500;AT4G38000;<br>AT5G39660;AT5G60200;AT5G60850;AT5G62940;AT2G46590;AT1G07640;AT1G21340;<br>AT1G26790;AT1G47655;AT1G51700;AT1G69570;AT2G28510;AT2G28810;AT2G34140;<br>AT3G50410;AT3G55370;AT3G61850;AT4G00940;AT4G21050;AT4G21080;AT4G24060;<br>AT5G01380                                                                                                                                                                                                                                                                                                                                                                                                                                                                                                                                                                                                                                                                                                                                                                                                                           |
| -421 | TfmatrixID_0267 | Trihelix              | + | 0.8  | CTTAC               | AT1G51600;AT2G45050;AT3G06740;AT3G16870;AT3G21175;AT3G24050;AT3G54810;<br>AT3G60530;AT4G17570;AT4G24470;AT4G26150;AT4G32890;AT4G34680;AT5G25830;<br>AT5G26930;AT5G56860;AT5G66320;AT2G18380;AT3G50870;AT4G36620<br>AT1G77920;AT3G12250;AT5G06950;AT5G06960;AT5G10030;AT5G65210;AT1G22070<br>PALINDROMICBOXXGM<br>AT1G29160;AT1G64620;AT2G37590;AT3G21270;AT3G45610;AT3G47500;AT4G38000;<br>AT5G39660;AT5G60200;AT5G60850;AT5G62940;AT2G46590;AT1G07640;AT1G21340;<br>AT1G26790;AT1G47655;AT1G51700;AT1G69570;AT2G28510;AT2G28810;AT2G34140;<br>AT3G50410;AT3G55370;AT3G61850;AT4G00940;AT4G21050;AT4G21080;AT4G24060;<br>AT5G01380                                                                                                                                                                                                                                                                                                                                                                                                                                                                                                          |
| -413 | TfmatrixID_0237 | GATA; tify            | - | 1    | CATCC               | AT1G51600;AT2G45050;AT3G06740;AT3G16870;AT3G21175;AT3G24050;AT3G54810;<br>AT3G60530;AT4G17570;AT4G24470;AT4G26150;AT4G32890;AT4G34680;AT5G25830;<br>AT5G26930;AT5G56860;AT5G66320;AT2G18380;AT3G50870;AT4G36620<br>AT1G77920;AT3G12250;AT5G06950;AT5G06960;AT5G10030;AT5G65210;AT1G22070<br>UPRMOTIFIIAT                                                                                                                                                                                                                                                                                                                                                                                                                                                                                                                                                                                                                                                                                                                                                                                                                                    |
| -409 | TfmatrixID_0271 | bZIP                  | + | 0.8  | CCCTA               | AT1G77920;AT3G12250;AT5G06950;AT5G06960;AT5G10030;AT5G65210;AT1G22070<br>UPRMOTIFIIAT                                                                                                                                                                                                                                                                                                                                                                                                                                                                                                                                                                                                                                                                                                                                                                                                                                                                                                                                                                                                                                                       |
| -408 | TfmatrixID_0188 | (Motif sequence only) | + | 0.86 | ctcctaagctctctCCACC | AT1G77920;AT3G12250;AT5G06950;AT5G06960;AT5G10030;AT5G65210;AT1G22070<br>UPRMOTIFIIAT<br>AT3G24520;AT1G32330;AT1G462640;AT1G67970;AT2G26150;AT2G41690;AT3G02990;<br>AT3G22830;AT3G51910;AT3G63350;AT4G11660;AT4G13980;AT4G17150;AT4G18880;<br>AT5G03720;AT5G16820;AT5G43840;AT5G45710;AT5G54070;AT5G62020<br>SORLIP1AT<br>ABRELATERD1<br>AT5G01380<br>SURECOREATSULTR11<br>ANAERO1CONSENSUS<br>JASE2ATOPR1<br>AT1G32640<br>AT3G54620;AT4G02640<br>AT1G01720<br>ABRELATERD1<br>AT2G28550<br>AT5G60120<br>AT3G54620;AT4G02640<br>AT3G46640<br>AT3G46640<br>L57ATPR1<br>ABRELATERD1<br>AT1G77920;AT3G12250;AT5G06950;AT5G06960;AT5G10030;AT5G65210;AT1G22070<br>UD1377<br>AT1G51600;AT2G45050;AT3G06740;AT3G16870;AT3G21175;AT3G24050;AT3G54810;<br>AT3G60530;AT4G17570;AT4G24470;AT4G26150;AT4G32890;AT4G34680;AT5G25830;<br>AT5G26930;AT5G56860;AT5G66320;AT2G18380;AT3G50870;AT4G36620<br>AT5G01380<br>SURECOREATSULTR11<br>AT1G51600;AT2G45050;AT3G06740;AT3G16870;AT3G21175;AT3G24050;AT3G54810;<br>AT3G60530;AT4G17570;AT4G24470;AT4G26150;AT4G32890;AT4G34680;AT5G25830;<br>AT5G26930;AT5G56860;AT5G66320;AT2G18380;AT3G50870;AT4G36620 |
| -378 | TfmatrixID_0243 | GATA; tify            | - | 1    | GTATC               | AT1G51600;AT2G45050;AT3G06740;AT3G16870;AT3G21175;AT3G24050;AT3G54810;<br>AT3G60530;AT4G17570;AT4G24470;AT4G26150;AT4G32890;AT4G34680;AT5G25830;<br>AT5G26930;AT5G56860;AT5G66320;AT2G18380;AT3G50870;AT4G36620<br>AT5G01380<br>SURECOREATSULTR11<br>AT1G51600;AT2G45050;AT3G06740;AT3G16870;AT3G21175;AT3G24050;AT3G54810;<br>AT3G60530;AT4G17570;AT4G24470;AT4G26150;AT4G32890;AT4G34680;AT5G25830;<br>AT5G26930;AT5G56860;AT5G66320;AT2G18380;AT3G50870;AT4G36620                                                                                                                                                                                                                                                                                                                                                                                                                                                                                                                                                                                                                                                                        |
| -378 | TfmatrixID_0267 | Trihelix              | - | 0.8  | GTATC               | AT1G51600;AT2G45050;AT3G06740;AT3G16870;AT3G21175;AT3G24050;AT3G54810;<br>AT3G60530;AT4G17570;AT4G24470;AT4G26150;AT4G32890;AT4G34680;AT5G25830;<br>AT5G26930;AT5G56860;AT5G66320;AT2G18380;AT3G50870;AT4G36620<br>AT5G01380<br>SURECOREATSULTR11<br>AT1G51600;AT2G45050;AT3G06740;AT3G16870;AT3G21175;AT3G24050;AT3G54810;<br>AT3G60530;AT4G17570;AT4G24470;AT4G26150;AT4G32890;AT4G34680;AT5G25830;<br>AT5G26930;AT5G56860;AT5G66320;AT2G18380;AT3G50870;AT4G36620                                                                                                                                                                                                                                                                                                                                                                                                                                                                                                                                                                                                                                                                        |
| -378 | TfmatrixID_0261 | (Motif sequence only) | - | 0.8  | GTATC               | AT1G51600;AT2G45050;AT3G06740;AT3G16870;AT3G21175;AT3G24050;AT3G54810;<br>AT3G60530;AT4G17570;AT4G24470;AT4G26150;AT4G32890;AT4G34680;AT5G25830;<br>AT5G26930;AT5G56860;AT5G66320;AT2G18380;AT3G50870;AT4G36620<br>AT5G01380<br>SURECOREATSULTR11<br>AT1G51600;AT2G45050;AT3G06740;AT3G16870;AT3G21175;AT3G24050;AT3G54810;<br>AT3G60530;AT4G17570;AT4G24470;AT4G26150;AT4G32890;AT4G34680;AT5G25830;<br>AT5G26930;AT5G56860;AT5G66320;AT2G18380;AT3G50870;AT4G36620                                                                                                                                                                                                                                                                                                                                                                                                                                                                                                                                                                                                                                                                        |
| -377 | TfmatrixID_0237 | GATA; tify            | - | 1    | TATCC               | AT1G51600;AT2G45050;AT3G06740;AT3G16870;AT3G21175;AT3G24050;AT3G54810;<br>AT3G60530;AT4G17570;AT4G24470;AT4G26150;AT4G32890;AT4G34680;AT5G25830;<br>AT5G26930;AT5G56860;AT5G66320;AT2G18380;AT3G50870;AT4G36620<br>SORLIP1AT<br>SORLIP2AT<br>SORLIP2AT<br>UD1377                                                                                                                                                                                                                                                                                                                                                                                                                                                                                                                                                                                                                                                                                                                                                                                                                                                                            |
| -371 | TfmatrixID_0263 | (Motif sequence only) | - | 0.8  | CTGCC               | AT1G51600;AT2G45050;AT3G06740;AT3G16870;AT3G21175;AT3G24050;AT3G54810;<br>AT3G60530;AT4G17570;AT4G24470;AT4G26150;AT4G32890;AT4G34680;AT5G25830;<br>AT5G26930;AT5G56860;AT5G66320;AT2G18380;AT3G50870;AT4G36620<br>SORLIP1AT<br>SORLIP2AT<br>SORLIP2AT<br>UD1377                                                                                                                                                                                                                                                                                                                                                                                                                                                                                                                                                                                                                                                                                                                                                                                                                                                                            |
| -370 | TfmatrixID_0265 | (Motif sequence only) | + | 0.8  | TGGCC               | AT1G51600;AT2G45050;AT3G06740;AT3G16870;AT3G21175;AT3G24050;AT3G54810;<br>AT3G60530;AT4G17570;AT4G24470;AT4G26150;AT4G32890;AT4G34680;AT5G25830;<br>AT5G26930;AT5G56860;AT5G66320;AT2G18380;AT3G50870;AT4G36620<br>SORLIP1AT<br>SORLIP2AT<br>SORLIP2AT<br>UD1377                                                                                                                                                                                                                                                                                                                                                                                                                                                                                                                                                                                                                                                                                                                                                                                                                                                                            |
| -369 | TfmatrixID_0265 | (Motif sequence only) | + | 0.8  | GGCCG               | AT1G51600;AT2G45050;AT3G06740;AT3G16870;AT3G21175;AT3G24050;AT3G54810;<br>AT3G60530;AT4G17570;AT4G24470;AT4G26150;AT4G32890;AT4G34680;AT5G25830;<br>AT5G26930;AT5G56860;AT5G66320;AT2G18380;AT3G50870;AT4G36620<br>SORLIP1AT<br>SORLIP2AT<br>SORLIP2AT<br>UD1377                                                                                                                                                                                                                                                                                                                                                                                                                                                                                                                                                                                                                                                                                                                                                                                                                                                                            |
| -367 | TfmatrixID_0258 | Dehydrin              | + | 0.8  | CCGAA               | AT1G51600;AT2G45050;AT3G06740;AT3G16870;AT3G21175;AT3G24050;AT3G54810;<br>AT3G60530;AT4G17570;AT4G24470;AT4G26150;AT4G32890;AT4G34680;AT5G25830;<br>AT5G26930;AT5G56860;AT5G66320;AT2G18380;AT3G50870;AT4G36620<br>SORLIP1AT<br>ABRELATERD1<br>AT1G77920;AT3G12250;AT5G06950;AT5G06960;AT5G10030;AT5G65210;AT1G22070<br>UD1377                                                                                                                                                                                                                                                                                                                                                                                                                                                                                                                                                                                                                                                                                                                                                                                                              |
| -360 | TfmatrixID_0263 | (Motif sequence only) | + | 0.8  | TCCAC               | AT1G51600;AT2G45050;AT3G06740;AT3G16870;AT3G21175;AT3G24050;AT3G54810;<br>AT3G60530;AT4G17570;AT4G24470;AT4G26150;AT4G32890;AT4G34680;AT5G25830;<br>AT5G26930;AT5G56860;AT5G66320;AT2G18380;AT3G50870;AT4G36620<br>SORLIP1AT<br>ABRELATERD1<br>AT1G77920;AT3G12250;AT5G06950;AT5G06960;AT5G10030;AT5G65210;AT1G22070<br>UD1377                                                                                                                                                                                                                                                                                                                                                                                                                                                                                                                                                                                                                                                                                                                                                                                                              |
| -358 | TfmatrixID_0249 | (Motif sequence only) | - | 0.8  | CACCT               | AT1G51600;AT2G45050;AT3G06740;AT3G16870;AT3G21175;AT3G24050;AT3G54810;<br>AT3G60530;AT4G17570;AT4G24470;AT4G26150;AT4G32890;AT4G34680;AT5G25830;<br>AT5G26930;AT5G56860;AT5G66320;AT2G18380;AT3G50870;AT4G36620<br>SORLIP1AT<br>ABRELATERD1<br>AT1G77920;AT3G12250;AT5G06950;AT5G06960;AT5G10030;AT5G65210;AT1G22070<br>UD1377                                                                                                                                                                                                                                                                                                                                                                                                                                                                                                                                                                                                                                                                                                                                                                                                              |
| -357 | TfmatrixID_0239 | Dof                   | - | 1    | ACCTT               | AT1G29160;AT1G64620;AT2G37590;AT3G21270;AT3G45610;AT3G47500;AT4G38000;<br>AT5G39660;AT5G60200;AT5G60850;AT5G62940;AT2G46590;AT1G07640;AT1G21340;<br>AT1G26790;AT1G47655;AT1G51700;AT1G69570;AT2G28510;AT2G28810;AT2G34140;<br>AT3G50410;AT3G55370;AT3G61850;AT4G00940;AT4G21050;AT4G21080;AT4G24060;<br>AT1G33060;AT3G49530;AT4G35580;AT5G24590<br>WBXATNPR1<br>AT1G75240<br>AT5G01380<br>GT1CONSENSUS<br>AT4G36620<br>AT4G36620<br>AT3G06740;AT3G16870;AT4G16141;AT4G26150;AT5G26930;AT5G49300;AT5G56860<br>AT4G17570<br>AT5G47440                                                                                                                                                                                                                                                                                                                                                                                                                                                                                                                                                                                                         |
| -354 | TfmatrixID_0384 | NAC; NAM              | - | 0.89 | tttccGATCac         | AT1G29160;AT1G64620;AT2G37590;AT3G21270;AT3G45610;AT3G47500;AT4G38000;<br>AT5G39660;AT5G60200;AT5G60850;AT5G62940;AT2G46590;AT1G07640;AT1G21340;<br>AT1G26790;AT1G47655;AT1G51700;AT1G69570;AT2G28510;AT2G28810;AT2G34140;<br>AT3G50410;AT3G55370;AT3G61850;AT4G00940;AT4G21050;AT4G21080;AT4G24060;<br>AT1G33060;AT3G49530;AT4G35580;AT5G24590<br>WBXATNPR1<br>AT1G75240<br>AT5G01380<br>GT1CONSENSUS<br>AT4G36620<br>AT4G36620<br>AT3G06740;AT3G16870;AT4G16141;AT4G26150;AT5G26930;AT5G49300;AT5G56860<br>AT4G17570<br>AT5G47440                                                                                                                                                                                                                                                                                                                                                                                                                                                                                                                                                                                                         |
| -354 | TfmatrixID_0275 | (Motif sequence only) | + | 0.8  | TTGAG               | AT1G29160;AT1G64620;AT2G37590;AT3G21270;AT3G45610;AT3G47500;AT4G38000;<br>AT5G39660;AT5G60200;AT5G60850;AT5G62940;AT2G46590;AT1G07640;AT1G21340;<br>AT1G26790;AT1G47655;AT1G51700;AT1G69570;AT2G28510;AT2G28810;AT2G34140;<br>AT3G50410;AT3G55370;AT3G61850;AT4G00940;AT4G21050;AT4G21080;AT4G24060;<br>AT1G33060;AT3G49530;AT4G35580;AT5G24590<br>WBXATNPR1<br>AT1G75240<br>AT5G01380<br>GT1CONSENSUS<br>AT4G36620<br>AT4G36620<br>AT3G06740;AT3G16870;AT4G16141;AT4G26150;AT5G26930;AT5G49300;AT5G56860<br>AT4G17570<br>AT5G47440                                                                                                                                                                                                                                                                                                                                                                                                                                                                                                                                                                                                         |
| -350 | TfmatrixID_0241 | ZF-HD                 | - | 1    | GTAAT               | AT1G29160;AT1G64620;AT2G37590;AT3G21270;AT3G45610;AT3G47500;AT4G38000;<br>AT5G39660;AT5G60200;AT5G60850;AT5G62940;AT2G46590;AT1G07640;AT1G21340;<br>AT1G26790;AT1G47655;AT1G51700;AT1G69570;AT2G28510;AT2G28810;AT2G34140;<br>AT3G50410;AT3G55370;AT3G61850;AT4G00940;AT4G21050;AT4G21080;AT4G24060;<br>AT1G33060;AT3G49530;AT4G35580;AT5G24590<br>WBXATNPR1<br>AT1G75240<br>AT5G01380<br>GT1CONSENSUS<br>AT4G36620<br>AT4G36620<br>AT3G06740;AT3G16870;AT4G16141;AT4G26150;AT5G26930;AT5G49300;AT5G56860<br>AT4G17570<br>AT5G47440                                                                                                                                                                                                                                                                                                                                                                                                                                                                                                                                                                                                         |
| -350 | TfmatrixID_0267 | Trihelix              | - | 0.8  | GTAAT               | AT1G29160;AT1G64620;AT2G37590;AT3G21270;AT3G45610;AT3G47500;AT4G38000;<br>AT5G39660;AT5G60200;AT5G60850;AT5G62940;AT2G46590;AT1G07640;AT1G21340;<br>AT1G26790;AT1G47655;AT1G51700;AT1G69570;AT2G28510;AT2G28810;AT2G34140;<br>AT3G50410;AT3G55370;AT3G61850;AT4G00940;AT4G21050;AT4G21080;AT4G24060;<br>AT1G33060;AT3G49530;AT4G35580;AT5G24590<br>WBXATNPR1<br>AT1G75240<br>AT5G01380<br>GT1CONSENSUS<br>AT4G36620<br>AT4G36620<br>AT3G06740;AT3G16870;AT4G16141;AT4G26150;AT5G26930;AT5G49300;AT5G56860<br>AT4G17570<br>AT5G47440                                                                                                                                                                                                                                                                                                                                                                                                                                                                                                                                                                                                         |
| -347 | TfmatrixID_0321 | (Motif sequence only) | - | 1    | aTTCCc              | AT1G29160;AT1G64620;AT2G37590;AT3G21270;AT3G45610;AT3G47500;AT4G38000;<br>AT5G39660;AT5G60200;AT5G60850;AT5G62940;AT2G46590;AT1G07640;AT1G21340;<br>AT1G26790;AT1G47655;AT1G51700;AT1G69570;AT2G28510;AT2G28810;AT2G3414                                                                                                                                                                                                                                                                                                                                                                                                                                                                                                                                                                                                                                                                                                                                                                                                                                                                                                                    |

|      |                          |                       |          |            |                           |                                                                                                                                                                                                                                                                                                                                                        |
|------|--------------------------|-----------------------|----------|------------|---------------------------|--------------------------------------------------------------------------------------------------------------------------------------------------------------------------------------------------------------------------------------------------------------------------------------------------------------------------------------------------------|
| -337 | TfmatrixID_1171          | Myb/SANT; MYB         | -        | 0.91       | accggcCGTTAaac            | AT5G17800                                                                                                                                                                                                                                                                                                                                              |
| -337 | TfmatrixID_1434          | MADF; Trihelix        | -        | 0.9        | accggcCGTTAaaa            | AT3G10030                                                                                                                                                                                                                                                                                                                                              |
| -337 | Tf_motif_seq_0248        | (Motif sequence only) | +        | 0.8        | ACCGG                     | MYBCOREATCYCB1                                                                                                                                                                                                                                                                                                                                         |
| -336 | TfmatrixID_0355          | Myb/SANT              | +        | 1          | ccggCCGTTa                | AT3G11440;AT5G06100                                                                                                                                                                                                                                                                                                                                    |
| -336 | TfmatrixID_0416          | Storekeeper           | +        | 0.96       | cCGGCggt                  | AT2G25650;AT4G00270                                                                                                                                                                                                                                                                                                                                    |
| -336 | TfmatrixID_0416          | Storekeeper           | +        | 0.98       | ccGGCCGt                  | AT2G25650;AT4G00270                                                                                                                                                                                                                                                                                                                                    |
| -336 | Tf_motif_seq_0258        | Dehydrin              | +        | 0.8        | CCGGC                     | U01377                                                                                                                                                                                                                                                                                                                                                 |
| -336 | TfmatrixID_1201          | Myb/SANT; MYB         | +        | 0.89       | ccggcCGTTAaacctt          | AT1G69560                                                                                                                                                                                                                                                                                                                                              |
| -336 | TfmatrixID_1223          | Myb/SANT; MYB         | +        | 0.92       | ccggcCGTTAaacctctg        | AT3G09230                                                                                                                                                                                                                                                                                                                                              |
| -335 | TfmatrixID_1166          | Myb/SANT; MYB         | +        | 0.89       | ccggcCGTTAaaa             | AT5G58850                                                                                                                                                                                                                                                                                                                                              |
| -335 | TfmatrixID_1516          | Myb/SANT; MYB         | +        | 1          | cggCCGTTa                 | AT5G67300                                                                                                                                                                                                                                                                                                                                              |
| -335 | TfmatrixID_1518          | Myb/SANT              | -        | 1          | cggCCGTTa                 | AT3G11440                                                                                                                                                                                                                                                                                                                                              |
| -335 | TfmatrixID_1549          | Myb/SANT              | +        | 1          | cggCCGTTa                 | AT2G23290                                                                                                                                                                                                                                                                                                                                              |
| -335 | Tf_motif_seq_0265        | (Motif sequence only) | +        | 0.8        | CGGCC                     | SORLIP2AT                                                                                                                                                                                                                                                                                                                                              |
| -334 | TfmatrixID_0330          | Myb/SANT              | +        | 0.95       | ggCCGTTa                  | AT2G23290;AT4G37260                                                                                                                                                                                                                                                                                                                                    |
| -334 | TfmatrixID_0350          | Myb/SANT; MYB         | +        | 0.9        | ggcCGTTAaaa               | AT4G18770                                                                                                                                                                                                                                                                                                                                              |
| -334 | Tf_motif_seq_0265        | (Motif sequence only) | -        | 0.8        | GGCCG                     | SORLIP2AT                                                                                                                                                                                                                                                                                                                                              |
| -333 | TfmatrixID_0241          | Dof                   | -        | 0.93       | gcCGTTAaaa                | AT5G60850                                                                                                                                                                                                                                                                                                                                              |
| -333 | TfmatrixID_0590          | MYB                   | -        | 0.91       | gCCGTTaaaa                | AT1G17950                                                                                                                                                                                                                                                                                                                                              |
| -333 | TfmatrixID_1014          | EN3; EIL              | +        | 0.95       | gCCGTTa                   | AT3G20770                                                                                                                                                                                                                                                                                                                                              |
| -332 | Tf_motif_seq_0313        | (Others)              | +        | 1          | CCGTTa                    | D14712                                                                                                                                                                                                                                                                                                                                                 |
| -332 | Tf_motif_seq_0248        | (Motif sequence only) | -        | 1          | CCGTT                     | MYBCOREATCYCB1                                                                                                                                                                                                                                                                                                                                         |
| -332 | Tf_motif_seq_0342        | (Motif sequence only) | -        | 1          | CCGTTa                    | MYB2CONSENSUSAT                                                                                                                                                                                                                                                                                                                                        |
| -331 | <b>Tf_motif_seq_0271</b> | <b>bZIP</b>           | <b>+</b> | <b>0.8</b> | <b>CGTTA</b>              | <b>AT1G77920;AT3G12250;AT5G06950;AT5G06960;AT5G10030;AT5G65210;AT1G22070</b>                                                                                                                                                                                                                                                                           |
| -330 | Tf_motif_seq_0267        | Trihelix              | +        | 0.8        | GTTAA                     | AT5G01380                                                                                                                                                                                                                                                                                                                                              |
| -330 | Tf_motif_seq_0275        | (Motif sequence only) | -        | 0.8        | GTTAA                     | WBOXATNPR1                                                                                                                                                                                                                                                                                                                                             |
|      |                          |                       |          |            |                           | AT1G29160;AT1G64620;AT2G37590;AT3G21270;AT3G45610;AT3G47500;AT4G38000;AT5G39660;AT5G60200;AT5G60850;AT5G62940;AT2G46590;AT1G07640;AT1G21340;AT1G26790;AT1G47655;AT1G51700;AT1G69570;AT2G28510;AT2G28810;AT2G34140;AT3G50410;AT3G55370;AT3G61850;AT4G00940;AT4G21050;AT4G21080;AT4G24060;                                                               |
| -324 | Tf_motif_seq_0239        | Dof                   | -        | 1          | ACCTT                     | U01377                                                                                                                                                                                                                                                                                                                                                 |
| -321 | Tf_motif_seq_0258        | Dehydrin              | -        | 0.8        | TTCGG                     | U01377                                                                                                                                                                                                                                                                                                                                                 |
| -317 | Tf_motif_seq_0258        | Dehydrin              | +        | 0.8        | GCGAC                     | U01377                                                                                                                                                                                                                                                                                                                                                 |
| -317 | TfmatrixID_1165          | Myb/SANT; MYB         | -        | 0.93       | ggcaCGCTCcaa              | AT2G02820                                                                                                                                                                                                                                                                                                                                              |
| -317 | Tf_motif_seq_0261        | (Motif sequence only) | +        | 0.8        | GCGAC                     | SURECOREATSULTR11                                                                                                                                                                                                                                                                                                                                      |
| -317 | Tf_motif_seq_0263        | (Motif sequence only) | +        | 0.8        | GCGAC                     | SORLIP1AT                                                                                                                                                                                                                                                                                                                                              |
| -316 | <b>Tf_motif_seq_0271</b> | <b>bZIP</b>           | <b>+</b> | <b>0.8</b> | <b>CGACG</b>              | <b>AT1G77920;AT3G12250;AT5G06950;AT5G06960;AT5G10030;AT5G65210;AT1G22070</b>                                                                                                                                                                                                                                                                           |
| -311 | TfmatrixID_0706          | AP2; ERF              | -        | 0.94       | ctctcaacaattCGCCGccaa     | AT3G20310                                                                                                                                                                                                                                                                                                                                              |
| -311 | Tf_motif_seq_0261        | (Motif sequence only) | -        | 0.8        | CTCTC                     | SURECOREATSULTR11                                                                                                                                                                                                                                                                                                                                      |
| -309 | Tf_motif_seq_0275        | (Motif sequence only) | -        | 0.8        | CTCAA                     | WBOXATNPR1                                                                                                                                                                                                                                                                                                                                             |
| -308 | TfmatrixID_0991          | C3H Zinc finger       | +        | 1          | TCAACa                    | AT5G58620                                                                                                                                                                                                                                                                                                                                              |
| -308 | TfmatrixID_0992          | C3H                   | +        | 1          | tCAACa                    | AT5G42820                                                                                                                                                                                                                                                                                                                                              |
| -307 | Tf_motif_seq_0255        | AP2; RAV; B3          | +        | 1          | CAACA                     | AT1G25560;AT1G13260                                                                                                                                                                                                                                                                                                                                    |
| -306 | TfmatrixID_0675          | AP2; ERF              | -        | 0.95       | aacaattCGCCGccaataga      | AT3G15210                                                                                                                                                                                                                                                                                                                                              |
| -306 | TfmatrixID_0715          | AP2; ERF              | -        | 0.95       | aacaattCGCCGccaataga      | AT1G28370                                                                                                                                                                                                                                                                                                                                              |
| -306 | TfmatrixID_0748          | AP2; ERF              | +        | 0.97       | aacaattcgCGCCaatagaaccacc | AT3G23240                                                                                                                                                                                                                                                                                                                                              |
|      |                          |                       |          |            |                           | AT1G09030;AT1G17590;AT1G21970;AT1G30500;AT1G54160;AT1G54830;AT1G56170;AT1G72830;AT2G38880;AT2G47810;AT3G05690;AT3G14020;AT3G20910;AT3G53340;AT4G14540;AT5G06510;AT5G12840;AT5G27910;AT5G38140;AT5G47640;AT5G47670;                                                                                                                                     |
| -305 | Tf_motif_seq_0257        | NF-YB;NF-YA;NF-YC     | +        | 0.8        | ACAAT                     | AT5G64750                                                                                                                                                                                                                                                                                                                                              |
| -305 | TfmatrixID_0676          | AP2                   | +        | 0.93       | acaattCGCCGccaatagaac     | AT1G53170                                                                                                                                                                                                                                                                                                                                              |
| -305 | TfmatrixID_0688          | AP2; ERF              | +        | 0.97       | acaattCGCCGccaatag        | AT4G34410                                                                                                                                                                                                                                                                                                                                              |
| -305 | TfmatrixID_0709          | AP2; ERF              | +        | 0.9        | acaattCGCCGccaataga       | AT5G44210                                                                                                                                                                                                                                                                                                                                              |
| -304 | TfmatrixID_0740          | AP2; ERF              | +        | 0.94       | caattCGCCGccaatag         | AT1G53910                                                                                                                                                                                                                                                                                                                                              |
| -303 | TfmatrixID_0685          | AP2; ERF              | +        | 0.94       | aattcgCGCCaatagaacca      | AT1G47870                                                                                                                                                                                                                                                                                                                                              |
| -303 | TfmatrixID_1013          | E2F/DP                | +        | 0.83       | aattcgCGCCaata            | AT1G09030;AT1G17590;AT1G21970;AT1G30500;AT1G54160;AT1G54830;AT1G56170;AT1G72830;AT2G38880;AT2G47810;AT3G05690;AT3G14020;AT3G20910;AT3G53340;AT4G14540;AT5G06510;AT5G12840;AT5G27910;AT5G38140;AT5G47640;AT5G47670;                                                                                                                                     |
|      |                          |                       |          |            |                           | AT1G03800                                                                                                                                                                                                                                                                                                                                              |
| -302 | Tf_motif_seq_0257        | NF-YB;NF-YA;NF-YC     | -        | 0.8        | ATTCCG                    | AT2G44840                                                                                                                                                                                                                                                                                                                                              |
| -302 | TfmatrixID_0735          | AP2                   | -        | 0.96       | attCGCCGccaatagaacca      | AT2G36010                                                                                                                                                                                                                                                                                                                                              |
| -302 | TfmatrixID_0738          | AP2; ERF              | +        | 0.96       | attcgCGCCaatag            | AT5G14960                                                                                                                                                                                                                                                                                                                                              |
| -302 | TfmatrixID_1007          | E2F/DP                | -        | 0.86       | attcgCGCCaata             | AT2G36010                                                                                                                                                                                                                                                                                                                                              |
| -302 | TfmatrixID_1008          | E2F/DP                | -        | 0.75       | attcgCGCCaatagaacca       | AT2G36010                                                                                                                                                                                                                                                                                                                                              |
| -302 | TfmatrixID_1009          | E2F/DP                | +        | 0.86       | attcgCGCCaata             | E2FCONSENSUS                                                                                                                                                                                                                                                                                                                                           |
| -302 | Tf_motif_seq_0458        | (Motif sequence only) | +        | 1          | aTTCGcg                   | AT3G23240                                                                                                                                                                                                                                                                                                                                              |
| -301 | TfmatrixID_0039          | AP2; ERF              | +        | 0.99       | ttcCGCCGcca               | AT1G04370;AT1G53910;AT3G23220;AT4G18450;AT4G34410;AT5G07310;AT5G47220;AT5G50080;AT5G61590;AT5G61890;AT5G64750                                                                                                                                                                                                                                          |
| -301 | TfmatrixID_0102          | AP2; ERF              | +        | 1          | ttcCGCCGcca               | AT1G04370;AT1G28360;AT1G53910;AT2G47520;AT3G66130;AT4G18450;AT4G34410;AT5G07310;AT5G644210;AT5G647230;AT5G50080;AT5G61590;AT5G61600;AT5G61890;AT1G04370;AT1G22190;AT1G36060;AT1G53910;AT2G20880;AT2G40220;AT2G46310;AT2G47520;AT3G16770;AT3G23220;AT3G61630;AT4G11140;AT4G18450;AT4G628140;AT4G34410;AT5G07310;AT5G44210;AT5G50080;AT5G61890;AT5G64750 |
| -301 | TfmatrixID_0103          | AP2; ERF              | +        | 1          | ttcCGCCGcca               | AT3G16770                                                                                                                                                                                                                                                                                                                                              |
|      |                          |                       |          |            |                           | AT4G34410                                                                                                                                                                                                                                                                                                                                              |
| -301 | TfmatrixID_0113          | AP2; ERF              | +        | 1          | ttcCGCCGcca               | AT1G22985;AT1G71130;AT3G61630;AT4G11140                                                                                                                                                                                                                                                                                                                |
| -301 | TfmatrixID_0598          | AP2; ERF              | +        | 0.98       | ttcCGCCGcca               | AT1G03800;AT1G12980;AT1G24590;AT1G28360;AT1G28370;AT1G27360;AT5G44210;AT2G46310;AT3G23220;AT3G23230;AT3G61630;AT4G11140;AT4G18450;AT4G34410;AT1G04370;AT3G23220;AT3G23240;AT4G18450                                                                                                                                                                    |
| -301 | TfmatrixID_0056          | AP2; ERF              | +        | 1          | tcGCGCcaa                 | AT1G04370;AT1G53910;AT3G23220;AT3G61630;AT4G17500;AT4G18450;AT4G34410;AT5G07310;AT5G50080;AT5G61590;AT5G61890;AT5G64750                                                                                                                                                                                                                                |
| -301 | TfmatrixID_0059          | AP2; ERF              | +        | 1          | tcGCGCcaa                 | AT5G07580;AT5G61590;AT5G61600                                                                                                                                                                                                                                                                                                                          |
| -301 | TfmatrixID_0600          | AP2; ERF              | +        | 0.96       | tcGCGCcaa                 | AT1G28360;AT1G36060;AT1G53910;AT2G46310;AT2G47520;AT3G16770;AT3G57600;AT3G61630;AT4G11140;AT4G34410;AT5G07310;AT5G13330;AT5G44210;AT5G50080;AT1G04370;AT1G12890;AT1G24590;AT1G28160;AT3G23220;AT4G18450;AT5G13910;AT5G43410;AT5G44210;AT5G61600                                                                                                        |
| -300 | TfmatrixID_0101          | AP2; ERF              | +        | 1          | tcCGCGcaa                 | AT1G53910;AT2G46310;AT3G61630;AT4G11140;AT4G34410;AT5G53290                                                                                                                                                                                                                                                                                            |
| -300 | TfmatrixID_0107          | AP2; ERF              | +        | 1          | tcGCGCcaa                 | AT3G16770                                                                                                                                                                                                                                                                                                                                              |
| -300 | TfmatrixID_0599          | AP2; ERF              | +        | 0.97       | tcCGCGcaa                 | AT3G16770                                                                                                                                                                                                                                                                                                                                              |
| -300 | TfmatrixID_0600          | AP2; ERF              | +        | 0.96       | tcGCGCcaa                 | AT1G43160                                                                                                                                                                                                                                                                                                                                              |
| -300 | TfmatrixID_0602          | AP2; ERF              | +        | 0.96       | tcCGCGcaa                 | AT4G34410                                                                                                                                                                                                                                                                                                                                              |
| -300 | TfmatrixID_0607          | AP2; ERF              | +        | 0.98       | tcCGCGcaa                 | AT4G34410                                                                                                                                                                                                                                                                                                                                              |
| -300 | TfmatrixID_0608          | AP2; ERF              | +        | 0.94       | tcCGCGcaa                 | AT4G34410                                                                                                                                                                                                                                                                                                                                              |
| -300 | TfmatrixID_1558          | AP2                   | -        | 1          | tcCGCGCca                 | AT1G04370                                                                                                                                                                                                                                                                                                                                              |
|      |                          |                       |          |            |                           | AT1G03800;AT1G12890;AT1G12980;AT1G24590;AT1G28160;AT1G28360;AT3G16770;AT5G07310;AT5G13910;AT5G18560;AT5G44210;AT5G50080;AT5G61890;AT5G64750                                                                                                                                                                                                            |
| -299 | TfmatrixID_0053          | AP2; ERF              | +        | 1          | CGCCGcca                  | AT1G03800;AT1G12980;AT1G24590;AT1G28360;AT1G50540;AT1G60580;AT4G11140;AT5G13910;AT5G18560;AT5G44210;AT5G50080;AT5G64750                                                                                                                                                                                                                                |
| -299 | TfmatrixID_0061          | AP2; ERF              | +        | 1          | CGCCGcca                  | AT1G03800;AT1G12980;AT1G24590;AT1G28360;AT1G53170;AT4G34410;AT5G13910;AT5G18560;AT5G44210;AT5G50080;AT5G64750                                                                                                                                                                                                                                          |
| -299 | TfmatrixID_0062          | AP2; ERF              | +        | 1          | CGCCGcca                  | AT1G04370;AT2G44840;AT3G23220;AT4G34410;AT5G61590;AT5G61600;AT5G61890                                                                                                                                                                                                                                                                                  |
| -299 | TfmatrixID_0071          | AP2; ERF              | +        | 1          | cgCCCGcca                 | AT1G12980;AT1G24590;AT1G28360;AT3G20310;AT4G34410;AT5G44210;AT5G61590;AT1G24590;AT1G28360;AT5G44210;AT5G61600                                                                                                                                                                                                                                          |
| -299 | TfmatrixID_0077          | AP2; ERF              | +        | 1          | CGCCGcca                  | AT1G12980;AT1G22190;AT1G24590;AT1G28160;AT1G28360;AT1G36060;AT1G53910;AT3G16770;AT5G13910;AT5G50080                                                                                                                                                                                                                                                    |
| -299 | TfmatrixID_0110          | AP2; ERF              | +        | 1          | CGCCGcca                  | AT1G04370;AT3G23220;AT3G23240;AT4G18450                                                                                                                                                                                                                                                                                                                |
|      |                          |                       |          |            |                           | AT1G43160                                                                                                                                                                                                                                                                                                                                              |
| -299 | TfmatrixID_0122          | AP2; ERF              | +        | 1          | cgCCGcca                  | AT3G23240                                                                                                                                                                                                                                                                                                                                              |
| -299 | TfmatrixID_0512          | AP2; ERF              | -        | 1          | CGCCGcca                  | AT3G16770                                                                                                                                                                                                                                                                                                                                              |
| -299 | TfmatrixID_0689          | AP2; ERF              | -        | 1          | CGCCGcca                  | AT1G53910                                                                                                                                                                                                                                                                                                                                              |
| -299 | TfmatrixID_0720          | AP2; ERF              | -        | 1          | cgCCGcca                  | SORLIP1AT                                                                                                                                                                                                                                                                                                                                              |
| -299 | TfmatrixID_1550          | AP2; ERF              | +        | 1          | CGCCGcca                  | GCCCORE                                                                                                                                                                                                                                                                                                                                                |
| -298 | TfmatrixID_1535          | AP2; ERF              | -        | 1          | GCCGccaata                | U01377                                                                                                                                                                                                                                                                                                                                                 |
| -298 | Tf_motif_seq_0263        | (Motif sequence only) | +        | 0.8        | GCCGc                     | E2FCONSENSUS                                                                                                                                                                                                                                                                                                                                           |
| -298 | Tf_motif_seq_0318        | (Motif sequence only) | +        | 1          | GCCGc                     | SORLIP1AT                                                                                                                                                                                                                                                                                                                                              |
| -297 | Tf_motif_seq_0258        | Dehydrin              | +        | 0.8        | CGCCG                     | GCCCORE                                                                                                                                                                                                                                                                                                                                                |
| -297 | Tf_motif_seq_0458        | (Motif sequence only) | -        | 1          | ccGCAAT                   | U01377                                                                                                                                                                                                                                                                                                                                                 |
| -296 | <b>Tf_motif_seq_0271</b> | <b>bZIP</b>           | <b>+</b> | <b>0.8</b> | <b>CGCAA</b>              | <b>AT1G77920;AT3G12250;AT5G06950;AT5G06960;AT5G10030;AT5G65210;AT1G22070</b>                                                                                                                                                                                                                                                                           |
| -295 | Tf_motif_seq_0263        | (Motif sequence only) | +        | 0.8        | GCCAA                     | SORLIP1AT                                                                                                                                                                                                                                                                                                                                              |
| -295 | Tf_motif_seq_0275        | (Motif sequence only) | -        | 0.8        | GCCAA                     | WBOXATNPR1                                                                                                                                                                                                                                                                                                                                             |

|      |                   |                           |   |      |                       |                                                                                                                                       |
|------|-------------------|---------------------------|---|------|-----------------------|---------------------------------------------------------------------------------------------------------------------------------------|
| -294 | TF_motif_seq_0257 | NF-YB,NF-YA,NF-YC         | + | 1    | CCAAT                 | AT1G09030;AT1G17590;AT1G21970;AT1G30500;AT1G54160;AT1G54830;AT1G56170;                                                                |
| -291 | TFmatrixID_1214   | MVB                       | + | 0.95 | atagaaCCACcact        | AT1G72830;AT2G38880;AT2G47810;AT3G05690;AT3G14020;AT3G20910;AT3G53340;                                                                |
| -290 | TF_motif_seq_0254 | AP2;ERF                   | - | 0.8  | TAGAA                 | AT4G14540;AT5G06510;AT5G12840;AT5G27910;AT5G38140;AT5G47640;AT5G46760;                                                                |
| -289 | TFmatrixID_0589   | MVB                       | + | 0.97 | agAACCAcca            | AT4G01680                                                                                                                             |
| -288 | TF_motif_seq_0341 | (Motif sequence only)     | + | 0.95 | gAACCA                | AT3G14230                                                                                                                             |
| -286 | TF_motif_seq_0263 | (Motif sequence only)     | + | 0.8  | ACCAC                 | AT5G12870                                                                                                                             |
| -283 | TF_motif_seq_0263 | (Motif sequence only)     | + | 0.8  | ACCAC                 | MYB1AT<br>SORLUP1AT<br>SORLUP1AT                                                                                                      |
| -282 | TF_motif_seq_0257 | NF-YB,NF-YA,NF-YC         | + | 0.8  | CCAAT                 | AT1G09030;AT1G17590;AT1G21970;AT1G30500;AT1G54160;AT1G54830;AT1G56170;                                                                |
| -280 | TF_motif_seq_0288 | (Motif sequence only)     | + | 1    | ACTCAT                | AT1G72830;AT2G38880;AT2G47810;AT3G05690;AT3G14020;AT3G20910;AT3G53340;                                                                |
| -278 | TF_motif_seq_0390 | (Motif sequence only)     | + | 0.86 | TCATCtc               | AT4G14540;AT5G06510;AT5G12840;AT5G27910;AT5G38140;AT5G47640;AT5G46760;                                                                |
| -277 | TF_motif_seq_0237 | GATA; tify                | - | 1    | CATCT                 | PREATPRODH<br>ANAERO3CONSENSUS                                                                                                        |
| -277 | TFmatrixID_0680   | AP2;ERF                   | - | 0.93 | cattcctaactCGACat     | AT1G51600;AT2G45050;AT3G06740;AT3G16870;AT3G21175;AT3G24050;AT3G54810;                                                                |
| -276 | TF_motif_seq_0254 | AP2;ERF                   | - | 0.8  | ATCTC                 | AT3G60530;AT4G17570;AT4G24470;AT4G26150;AT4G32890;AT4G34680;AT5G25830;                                                                |
| -276 | TF_motif_seq_0261 | (Motif sequence only)     | - | 0.8  | ATCTC                 | AT5G26930;AT5G56860;AT5G66320;AT2G18380;AT3G50870;AT4G36620                                                                           |
| -273 | TFmatrixID_0280   | Homeodomain; HD-ZIP       | - | 0.95 | tcATTAActc            | SURECOREATSULR11                                                                                                                      |
| -273 | TFmatrixID_1064   | Homeodomain; HD-ZIP       | + | 0.9  | tcATTAActc            | AT1G05230;AT1G17920;AT1G73360;AT1G79840;AT3G03260;AT3G61150;AT5G46880                                                                 |
| -273 | TFmatrixID_1068   | Homeodomain; HD-ZIP       | + | 0.91 | tcATTAActc            | AT4G00730                                                                                                                             |
| -273 | TFmatrixID_1070   | HD-ZIP                    | + | 0.94 | tcATTAActc            | AT4G00730                                                                                                                             |
| -273 | TFmatrixID_1074   | Homeodomain; HD-ZIP       | - | 0.9  | tcATTAActc            | AT5G52170                                                                                                                             |
| -273 | TFmatrixID_1082   | Homeodomain; HD-ZIP       | + | 0.93 | tcATTAActc            | AT3G61150                                                                                                                             |
| -273 | TFmatrixID_1084   | Homeodomain; HD-ZIP       | - | 0.92 | tcATTAActc            | AT1G73360                                                                                                                             |
| -273 | TFmatrixID_1616   | AP2;ERF                   | + | 0.86 | tcattaactCCGACattaata | AT3G61150                                                                                                                             |
| -273 | TFmatrixID_1625   | AP2;ERF                   | + | 0.88 | tcattaactCGACattaata  | AT1G12610                                                                                                                             |
| -272 | TFmatrixID_0776   | AP2;ERF                   | - | 0.86 | cattaactCGACat        | AT1G63030                                                                                                                             |
| -272 | TFmatrixID_1618   | AP2;ERF                   | - | 0.92 | cattaactCGACattaata   | AT4G16750                                                                                                                             |
| -271 | TF_motif_seq_0241 | ZF-HD                     | + | 1    | ATTA                  | AT1G12610                                                                                                                             |
| -271 | TFmatrixID_1611   | AP2;ERF                   | - | 0.9  | attaactCGACattaata    | AT1G75240                                                                                                                             |
| -271 | TFmatrixID_1612   | AP2;ERF                   | - | 0.88 | attaactCGACattaata    | AT1G12610                                                                                                                             |
| -271 | TFmatrixID_1613   | AP2;ERF                   | - | 0.88 | attaactCGACattaata    | AT1G12610                                                                                                                             |
| -271 | TFmatrixID_1614   | AP2;ERF                   | - | 0.9  | attaactCGACattaata    | AT1G12610                                                                                                                             |
| -271 | TFmatrixID_1615   | AP2;ERF                   | - | 0.87 | attaactCGACattaata    | AT1G12610                                                                                                                             |
| -271 | TFmatrixID_1617   | AP2;ERF                   | - | 0.9  | attaactCGACattaata    | AT1G12610                                                                                                                             |
| -271 | TFmatrixID_1619   | AP2;ERF                   | - | 0.87 | attaactCGACattaata    | AT1G12610                                                                                                                             |
| -271 | TFmatrixID_1620   | AP2;ERF                   | - | 0.91 | attaactCGACattaata    | AT1G63030                                                                                                                             |
| -271 | TFmatrixID_1621   | AP2;ERF                   | - | 0.89 | attaactCGACattaata    | AT1G63030                                                                                                                             |
| -271 | TFmatrixID_1622   | AP2;ERF                   | + | 0.91 | attaactCGACattaata    | AT1G63030                                                                                                                             |
| -271 | TFmatrixID_1623   | AP2;ERF                   | - | 0.91 | attaactCGACattaata    | AT1G63030                                                                                                                             |
| -271 | TFmatrixID_1624   | AP2;ERF                   | - | 0.89 | attaactCGACattaata    | AT1G63030                                                                                                                             |
| -271 | TFmatrixID_1626   | AP2;ERF                   | - | 0.91 | attaactCGACattaata    | AT1G63030                                                                                                                             |
| -271 | TFmatrixID_1627   | AP2;ERF                   | - | 0.88 | attaactCGACattaata    | AT1G63030                                                                                                                             |
| -270 | TF_motif_seq_0267 | Trhlex                    | - | 0.8  | TTAAC                 | AT5G01380                                                                                                                             |
| -270 | TF_motif_seq_0275 | (Motif sequence only)     | + | 0.8  | TTAAC                 | WBOXATNPR1                                                                                                                            |
| -269 | TFmatrixID_0665   | AP2;ERF                   | - | 0.95 | taactCCGACatta        | AT4G25490                                                                                                                             |
| -269 | TFmatrixID_0682   | AP2;ERF                   | - | 0.92 | taactCCGACatta        | AT5G52020                                                                                                                             |
| -269 | TFmatrixID_0697   | AP2;ERF                   | - | 0.93 | taactCCGACatt         | AT5G52020                                                                                                                             |
| -269 | TFmatrixID_0711   | AP2;ERF                   | + | 0.95 | taactCCGACatta        | AT4G25470                                                                                                                             |
| -269 | TFmatrixID_0727   | AP2;ERF                   | - | 0.91 | taactCCGACatta        | AT1G12610                                                                                                                             |
| -269 | TFmatrixID_0773   | AP2;ERF                   | - | 0.91 | taactCGACatta         | AT1G63030                                                                                                                             |
| -269 | TFmatrixID_0778   | AP2;ERF                   | + | 0.95 | taactCCGACat          | AT1G12610                                                                                                                             |
| -268 | TFmatrixID_0670   | AP2;ERF                   | - | 0.93 | aactCCGACatta         | AT1G12630                                                                                                                             |
| -268 | TFmatrixID_0695   | AP2;ERF                   | - | 0.86 | aactCCGACatt          | AT2G44940                                                                                                                             |
| -268 | TFmatrixID_0736   | AP2;ERF                   | + | 0.9  | aactCCGACatta         | AT5G25810                                                                                                                             |
| -268 | TFmatrixID_0805   | bHLH                      | - | 0.87 | aactCCGACatt          | AT2G31220                                                                                                                             |
| -267 | TFmatrixID_0652   | AP2;ERF                   | - | 0.91 | actCCGACatt           | AT1G77200                                                                                                                             |
| -267 | TFmatrixID_0667   | AP2;ERF                   | - | 0.95 | actCCGACatta          | AT5G51990                                                                                                                             |
| -267 | TFmatrixID_0669   | AP2;ERF                   | - | 0.96 | actCCGACatta          | AT4G25470                                                                                                                             |
| -266 | TFmatrixID_0020   | AP2;ERF                   | + | 0.89 | cttCCGACat            | AT1G77200                                                                                                                             |
| -266 | TFmatrixID_0040   | B3;ARF                    | - | 0.98 | cttCCGACatt           | AT2G33860                                                                                                                             |
| -266 | TFmatrixID_0109   | AP2;ERF                   | + | 0.91 | cttCCGACatt           | AT1G12610;AT4G25490;AT5G51990                                                                                                         |
| -266 | TFmatrixID_0655   | AP2;ERF                   | - | 0.96 | cttCCGACatta          | AT5G51990                                                                                                                             |
| -266 | TFmatrixID_0683   | AP2;ERF                   | - | 0.95 | cttCCGACatt           | AT4G25480                                                                                                                             |
| -266 | TFmatrixID_0691   | AP2;ERF                   | + | 0.89 | cttCCGACatta          | AT1G77200                                                                                                                             |
| -266 | TFmatrixID_0747   | AP2;ERF                   | - | 0.86 | cttCCGACatta          | AT3G60490                                                                                                                             |
| -265 | TFmatrixID_0032   | AP2;ERF                   | - | 0.93 | ttCCGACAtt            | AT1G12610<br>AT1G01250;AT1G12630;AT1G77200;AT2G25820;AT2G35700;AT2G44940;AT3G16280;                                                   |
| -265 | TFmatrixID_0088   | AP2;ERF                   | + | 0.92 | ttCCGACa              | AT3G60490;AT4G25490;AT4G32800;AT5G11590;AT5G25810;AT5G51990                                                                           |
| -265 | TFmatrixID_0785   | ARF                       | + | 0.99 | ttCCGACatt            | AT5G62000                                                                                                                             |
| -264 | TFmatrixID_0084   | AP2;ERF                   | + | 0.97 | ttCCGACat             | AT2G35700;AT2G44940;AT3G16280;AT3G60490;AT4G25470;AT4G25490;AT5G11590;                                                                |
| -264 | TFmatrixID_0156   | B3;ARF                    | + | 1    | ttCCGACatt            | AT1G19220;AT1G19850;AT1G30330;AT5G20730;AT5G37020;AT5G60450<br>AT1G12610;AT1G63030;AT1G75490;AT3G57600;AT4G25470;AT4G25480;AT4G25490; |
| -264 | TF_motif_seq_0292 | AP2;ERF;ERF               | + | 0.95 | tCCGAC                | AT5G05410;AT5G18450;AT5G51990;AT2G38340;AT3G11020                                                                                     |
| -264 | TF_motif_seq_0349 | (Others)                  | + | 0.86 | TCCGACA               | X67670;X67671                                                                                                                         |
| -264 | TFmatrixID_0784   | B3;ARF                    | + | 0.95 | tcCGACatta            | AT1G19850                                                                                                                             |
| -263 | TF_motif_seq_0258 | Dehydrin                  | + | 1    | CCGAC                 | U01377                                                                                                                                |
| -262 | TF_motif_seq_0271 | bZIP                      | - | 0.8  | CGACA                 | AT1G77920;AT3G12250;AT5G06950;AT5G06960;AT5G10030;AT5G65210;AT1G22070                                                                 |
| -261 | TFmatrixID_0290   | Homeodomain; HD-ZIP       | - | 0.98 | gaATAATA              | AT1G05230;AT1G17920;AT2G32370;AT3G61150;AT4G21750;AT5G46880                                                                           |
| -260 | TFmatrixID_0280   | Homeodomain; HD-ZIP       | - | 0.95 | acaTTAAta             | AT1G05230;AT1G17920;AT1G73360;AT1G79840;AT3G03260;AT3G61150;AT5G46880                                                                 |
| -260 | TFmatrixID_0288   | Homeodomain; HD-ZIP       | + | 0.96 | acaTTAAta             | AT1G05230;AT1G17920;AT3G61150;AT4G00730;AT5G46880                                                                                     |
| -260 | TFmatrixID_1067   | HD-ZIP                    | - | 0.89 | acataATAAttcgg        | AT5G66700                                                                                                                             |
| -260 | TFmatrixID_1068   | Homeodomain; HD-ZIP       | + | 0.9  | acATAAat              | AT4G00730                                                                                                                             |
| -260 | TFmatrixID_1074   | Homeodomain; HD-ZIP       | - | 0.9  | acATAAat              | AT3G61150                                                                                                                             |
| -259 | TFmatrixID_0144   | AT-Hook                   | - | 0.9  | catTAATAActc          | AT4G21895;AT5G62260                                                                                                                   |
| -259 | TFmatrixID_1058   | bZIP; Homeodomain; HD-ZIP | - | 0.85 | cattATAAAttc          | AT5G03790                                                                                                                             |
| -258 | TFmatrixID_0058   | Homeodomain; bZIP; HD-ZIP | - | 0.94 | attATAAAttcggg        | AT3G01470                                                                                                                             |
| -258 | TFmatrixID_0540   | Homeodomain; HD-ZIP; bZIP | + | 0.91 | attATAAAttcggg        | AT1G69780;AT3G01220;AT3G01470;AT5G15150                                                                                               |
| -258 | TF_motif_seq_0241 | ZF-HD                     | + | 1    | ATTA                  | AT1G75240                                                                                                                             |
| -258 | TFmatrixID_1060   | bZIP; Homeodomain; HD-ZIP | - | 0.9  | attATAAAttcgg         | AT5G03790                                                                                                                             |
| -258 | TFmatrixID_1088   | Homeodomain; bZIP; HD-ZIP | + | 0.95 | attATAAAttcggg        | AT3G01470                                                                                                                             |
| -257 | TFmatrixID_0026   | bZIP; Homeodomain; HD-ZIP | - | 0.94 | ttaATAATtc            | AT5G03790                                                                                                                             |
| -257 | TFmatrixID_0281   | Homeodomain; HD-ZIP       | - | 0.98 | ttATAAAttc            | AT1G26960;AT1G69780;AT2G22430;AT3G01220;AT5G15150                                                                                     |
| -257 | TFmatrixID_0517   | Homeodomain; HD-ZIP; bZIP | + | 0.93 | ttATAAAttcgg          | AT1G69780;AT3G01220;AT3G01470;AT5G15150                                                                                               |
| -257 | TF_motif_seq_0241 | ZF-HD                     | - | 1    | TTAA                  | AT1G75240                                                                                                                             |
| -257 | TFmatrixID_1057   | Homeodomain; bZIP; HD-ZIP | + | 0.97 | ttATAAAttc            | AT5G65310                                                                                                                             |
| -257 | TFmatrixID_1062   | HD-ZIP                    | + | 0.94 | ttATAAAttc            | AT5G66700                                                                                                                             |
| -257 | TFmatrixID_1073   | Homeodomain; HD-ZIP       | + | 0.99 | ttATAAAttc            | AT1G69780                                                                                                                             |
| -257 | TFmatrixID_1078   | Homeodomain; HD-ZIP       | - | 0.96 | ttATAAAttc            | AT3G01220                                                                                                                             |
| -257 | TFmatrixID_1086   | Homeodomain; HD-ZIP       | + | 0.96 | ttATAAAttc            | AT1G69780                                                                                                                             |
| -257 | TFmatrixID_1087   | Homeodomain; HD-ZIP       | + | 0.93 | ttATAAAttc            | AT2G22430                                                                                                                             |
| -257 | TFmatrixID_1089   | Homeodomain; bZIP; HD-ZIP | + | 0.97 | ttATAAAttc            | AT3G01470                                                                                                                             |
| -257 | TFmatrixID_1090   | Homeodomain; HD-ZIP       | + | 0.98 | ttATAAAttc            | AT3G01220                                                                                                                             |
| -256 | TFmatrixID_0047   | bZIP; Homeodomain; HD-ZIP | - | 0.91 | taATAATtc             | AT5G52150                                                                                                                             |
| -256 | TFmatrixID_0116   | Homeodomain; bZIP; HD-ZIP | - | 0.92 | laATAAAttc            | AT5G65310                                                                                                                             |
| -256 | TFmatrixID_0292   | Homeodomain; HD-ZIP       | - | 1    | laATAAAttc            | AT1G26960;AT1G69780;AT3G01220;AT4G40060;AT5G15150                                                                                     |
| -256 | TFmatrixID_0790   | ARID                      | - | 1    | laATAA                | AT3G13350                                                                                                                             |
| -255 | TFmatrixID_0471   | Homeodomain; HD-ZIP; bZIP | + | 0.99 | aaATAAAttc            | AT1G69780;AT3G01220;AT3G01470;AT5G15150                                                                                               |
| -254 | TF_motif_seq_0241 | ZF-HD                     | - | 1    | ATAA                  | AT1G75240                                                                                                                             |
| -254 | TFmatrixID_1509   | ZF-HD                     | - | 0.94 | ATAAAttcgggt          | AT1G14687                                                                                                                             |



|      |                   |                                |   |      |                   |                                                                                                                                                                                                                                                                                                                                                                                                                           |
|------|-------------------|--------------------------------|---|------|-------------------|---------------------------------------------------------------------------------------------------------------------------------------------------------------------------------------------------------------------------------------------------------------------------------------------------------------------------------------------------------------------------------------------------------------------------|
| -251 | TF_motif_seq_0257 | NF-YB,NF-YA,NF-YC              | - | 0.8  | ATTCG             | AT1G09030;AT1G17590;AT1G21970;AT1G30500;AT1G54160;AT1G54830;AT1G56170;AT1G72830;AT2G38880;AT2G47810;AT3G05690;AT3G14020;AT3G20910;AT3G53340;AT4G14540;AT5G06510;AT5G12840;AT5G27910;AT5G38140;AT5G47640;AT5G47670;AT1G32640                                                                                                                                                                                               |
| -251 | TF_motif_seq_0410 | bHLH                           | + | 0.75 | ATTCGggt          |                                                                                                                                                                                                                                                                                                                                                                                                                           |
| -250 | TF_motif_seq_0258 | Dehdryin                       | - | 0.8  | TTCCGG            | U01377                                                                                                                                                                                                                                                                                                                                                                                                                    |
| -249 | TF_motif_seq_0331 | TCP                            | + | 1    | lCGGGT            | AT3G27010                                                                                                                                                                                                                                                                                                                                                                                                                 |
| -248 | TF_motif_seq_0251 | TCP                            | + | 1    | CGGGT             | AT3G27010                                                                                                                                                                                                                                                                                                                                                                                                                 |
| -247 | TF_motif_seq_0265 | (Motif sequence only)          | + | 0.8  | GGGTC             | SORLP2AT                                                                                                                                                                                                                                                                                                                                                                                                                  |
| -245 | TF_motif_seq_0258 | Dehdryin                       | - | 1    | GTCCG             | U01377                                                                                                                                                                                                                                                                                                                                                                                                                    |
| -245 | TF_motif_seq_0292 | AP2;ERF;ERF                    | - | 0.95 | GTCCGg            | AT1G12610;AT1G63030;AT1G75490;AT3G57600;AT4G25470;AT4G25480;AT4G25490;AT5G05410;AT5G18450;AT5G51990;AT2G38340;AT3G11020                                                                                                                                                                                                                                                                                                   |
| -244 | TF_motif_seq_0331 | TCP                            | + | 1    | lCGGGT            | AT3G27010                                                                                                                                                                                                                                                                                                                                                                                                                 |
| -243 | TF_motif_seq_0251 | TCP                            | + | 1    | CGGGT             | AT3G27010                                                                                                                                                                                                                                                                                                                                                                                                                 |
| -242 | TF_motif_seq_0265 | (Motif sequence only)          | + | 0.8  | GGGTC             | SORLP2AT                                                                                                                                                                                                                                                                                                                                                                                                                  |
| -240 | TF_motif_seq_0258 | Dehdryin                       | - | 1    | GTCCG             | U01377                                                                                                                                                                                                                                                                                                                                                                                                                    |
| -240 | TF_motif_seq_0292 | AP2;ERF;ERF                    | - | 0.95 | GTCCGg            | AT1G12610;AT1G63030;AT1G75490;AT3G57600;AT4G25470;AT4G25480;AT4G25490;AT5G05410;AT5G18450;AT5G51990;AT2G38340;AT3G11020                                                                                                                                                                                                                                                                                                   |
| -239 | TF_motif_seq_0331 | TCP                            | + | 1    | lCGGGT            | AT3G27010                                                                                                                                                                                                                                                                                                                                                                                                                 |
| -238 | TF_motif_seq_0251 | TCP                            | + | 1    | CGGGT             | AT3G27010                                                                                                                                                                                                                                                                                                                                                                                                                 |
| -237 | TF_motif_seq_0265 | (Motif sequence only)          | + | 0.8  | GGGTC             | SORLP2AT                                                                                                                                                                                                                                                                                                                                                                                                                  |
| -235 | TF_motif_seq_0258 | Dehdryin                       | - | 1    | GTCCG             | U01377                                                                                                                                                                                                                                                                                                                                                                                                                    |
| -235 | TF_motif_seq_0292 | AP2;ERF;ERF                    | - | 0.95 | GTCCGg            | AT1G12610;AT1G63030;AT1G75490;AT3G57600;AT4G25470;AT4G25480;AT4G25490;AT5G05410;AT5G18450;AT5G51990;AT2G38340;AT3G11020                                                                                                                                                                                                                                                                                                   |
| -235 | FmatrixID_0944    | GATA                           | + | 0.88 | gtcGGATC          | AT2G18380                                                                                                                                                                                                                                                                                                                                                                                                                 |
| -234 | FmatrixID_0015    | MYB;ARR-B                      | + | 0.89 | tcGGATCagt        | AT1G67710                                                                                                                                                                                                                                                                                                                                                                                                                 |
| -234 | FmatrixID_0018    | Myb/SANT; MYB; ARR-B           | + | 0.91 | tcGGATCagt        | AT2G01760                                                                                                                                                                                                                                                                                                                                                                                                                 |
| -232 | TF_motif_seq_0237 | GATA; tify                     | + | 1    | GGATC             | AT1G51600;AT2G45050;AT3G06740;AT3G16870;AT3G21175;AT3G24050;AT3G54810;AT3G60530;AT4G17570;AT4G24470;AT4G26150;AT4G32890;AT4G34680;AT5G25830;AT5G26930;AT5G56860;AT5G66320;AT2G18380;AT3G50870;AT4G36620                                                                                                                                                                                                                   |
| -231 | TF_motif_seq_0237 | GATA; tify                     | - | 1    | GATCA             | AT1G51600;AT2G45050;AT3G06740;AT3G16870;AT3G21175;AT3G24050;AT3G54810;AT3G60530;AT4G17570;AT4G24470;AT4G26150;AT4G32890;AT4G34680;AT5G25830;AT5G26930;AT5G56860;AT5G66320;AT2G18380;AT3G50870;AT4G36620                                                                                                                                                                                                                   |
| -228 | TF_motif_seq_0248 | (Motif sequence only)          | - | 0.8  | CAGTT             | MYBCoreATCYCB1                                                                                                                                                                                                                                                                                                                                                                                                            |
| -225 | TF_motif_seq_0399 | (Motif sequence only)          | + | 0.84 | TTTGATc           | WBXPATNPR1                                                                                                                                                                                                                                                                                                                                                                                                                |
| -224 | TF_motif_seq_0254 | AP2;ERF                        | - | 0.8  | TTGAT             | AT3G14230                                                                                                                                                                                                                                                                                                                                                                                                                 |
| -224 | TF_motif_seq_0275 | (Motif sequence only)          | + | 0.8  | TTGAT             | WBXPATNPR1                                                                                                                                                                                                                                                                                                                                                                                                                |
| -223 | TF_motif_seq_0237 | GATA; tify                     | + | 1    | TGATC             | AT1G51600;AT2G45050;AT3G06740;AT3G16870;AT3G21175;AT3G24050;AT3G54810;AT3G60530;AT4G17570;AT4G24470;AT4G26150;AT4G32890;AT4G34680;AT5G25830;AT5G26930;AT5G56860;AT5G66320;AT2G18380;AT3G50870;AT4G36620                                                                                                                                                                                                                   |
| -223 | TF_motif_seq_0237 | GATA; tify                     | - | 1    | GATCC             | AT1G51600;AT2G45050;AT3G06740;AT3G16870;AT3G21175;AT3G24050;AT3G54810;AT3G60530;AT4G17570;AT4G24470;AT4G26150;AT4G32890;AT4G34680;AT5G25830;AT5G26930;AT5G56860;AT5G66320;AT2G18380;AT3G50870;AT4G36620                                                                                                                                                                                                                   |
| -222 | TF_motif_seq_0237 | GATA; tify                     | - | 1    | GATCC             | AT1G51600;AT2G45050;AT3G06740;AT3G16870;AT3G21175;AT3G24050;AT3G54810;AT3G60530;AT4G17570;AT4G24470;AT4G26150;AT4G32890;AT4G34680;AT5G25830;AT5G26930;AT5G56860;AT5G66320;AT2G18380;AT3G50870;AT4G36620                                                                                                                                                                                                                   |
| -221 | TF_motif_seq_0254 | AP2;ERF                        | + | 0.8  | ATCCA             | AT3G14230                                                                                                                                                                                                                                                                                                                                                                                                                 |
| -220 | FmatrixID_0793    | ARID; Sox                      | - | 0.83 | tcactATATActaac   | AT1G04880                                                                                                                                                                                                                                                                                                                                                                                                                 |
| -220 | TF_motif_seq_0263 | (Motif sequence only)          | + | 0.8  | TCCAC             | SORLP1AT                                                                                                                                                                                                                                                                                                                                                                                                                  |
| -219 | TF_motif_seq_0257 | NF-YB,NF-YA,NF-YC              | + | 0.8  | CCACT             | AT1G09030;AT1G17590;AT1G21970;AT1G30500;AT1G54160;AT1G54830;AT1G56170;AT1G72830;AT2G38880;AT2G47810;AT3G05690;AT3G14020;AT3G20910;AT3G53340;AT4G14540;AT5G06510;AT5G12840;AT5G27910;AT5G38140;AT5G47640;AT5G47670;AT1G04880                                                                                                                                                                                               |
| -219 | FmatrixID_0788    | ARID; Sox                      | + | 0.87 | ccactTATActaac    |                                                                                                                                                                                                                                                                                                                                                                                                                           |
| -218 | TF_motif_seq_0133 | (Motif sequence only)          | + | 0.71 | CACATatactaac     | 14BPATERD1                                                                                                                                                                                                                                                                                                                                                                                                                |
| -216 | TF_motif_seq_0434 | (Motif sequence only)          | - | 0.83 | ctaTATAC          | P1B5                                                                                                                                                                                                                                                                                                                                                                                                                      |
| -215 | TF_motif_seq_0254 | AP2;ERF                        | - | 0.8  | TATAT             | AT3G14230                                                                                                                                                                                                                                                                                                                                                                                                                 |
| -214 | TF_motif_seq_0254 | AP2;ERF                        | + | 0.8  | ATATA             | AT3G14230                                                                                                                                                                                                                                                                                                                                                                                                                 |
| -211 | TF_motif_seq_0373 | (Motif sequence only)          | - | 0.86 | taCTAAC           | MYB1LEPR                                                                                                                                                                                                                                                                                                                                                                                                                  |
| -209 | TF_motif_seq_0267 | Trihelix                       | - | 0.8  | CTAAC             | AT5G01380                                                                                                                                                                                                                                                                                                                                                                                                                 |
| -209 | TF_motif_seq_0366 | (Motif sequence only)          | + | 0.86 | CTAACcc           | MYBATRD22                                                                                                                                                                                                                                                                                                                                                                                                                 |
| -194 | TF_motif_seq_0261 | (Motif sequence only)          | + | 1    | GAGAC             | SURECOREATSULTR11                                                                                                                                                                                                                                                                                                                                                                                                         |
| -193 | TF_motif_seq_0271 | bZIP                           | + | 0.8  | AGACG             | AT1G77920;AT3G12250;AT5G06950;AT5G06960;AT5G10030;AT5G65210;AT1G22070                                                                                                                                                                                                                                                                                                                                                     |
| -193 | TF_motif_seq_0410 | bHLH                           | - | 0.75 | agaCGGAT          | AT1G32640                                                                                                                                                                                                                                                                                                                                                                                                                 |
| -192 | TF_motif_seq_0258 | Dehdryin                       | - | 0.8  | GACGG             | U01377                                                                                                                                                                                                                                                                                                                                                                                                                    |
| -192 | TF_motif_seq_0248 | (Motif sequence only)          | + | 0.8  | GACGG             | MYBCoreATCYCB1                                                                                                                                                                                                                                                                                                                                                                                                            |
| -189 | TF_motif_seq_0237 | GATA; tify                     | + | 1    | GGATT             | AT1G51600;AT2G45050;AT3G06740;AT3G16870;AT3G21175;AT3G24050;AT3G54810;AT3G60530;AT4G17570;AT4G24470;AT4G26150;AT4G32890;AT4G34680;AT5G25830;AT5G26930;AT5G56860;AT5G66320;AT2G18380;AT3G50870;AT4G36620                                                                                                                                                                                                                   |
| -189 | TF_motif_seq_0252 | Myb/SANT; MYB; ARR-B;MYB;ARR-B | + | 1    | GGATT             | AT2G01760;AT3G16857;AT4G16110;AT4G18020;AT4G31920;AT5G58080;AT1G67710;AT1G49190;AT2G25180;AT5G49240                                                                                                                                                                                                                                                                                                                       |
| -189 | FmatrixID_0932    | GATA                           | + | 0.9  | gbatGATCTaaaca    | AT3G60530                                                                                                                                                                                                                                                                                                                                                                                                                 |
| -189 | TF_motif_seq_0268 | (Motif sequence only)          | + | 1    | GGATT             | ARR1AT                                                                                                                                                                                                                                                                                                                                                                                                                    |
| -188 | FmatrixID_0265    | GATA; tify                     | - | 0.96 | gatGATCTa         | AT2G45050;AT3G45170;AT3G51080;AT5G25830;AT5G66320                                                                                                                                                                                                                                                                                                                                                                         |
| -188 | FmatrixID_0270    | GATA; tify                     | - | 1    | gatGATCTa         | AT2G28340;AT2G45050;AT4G34680;AT5G25830;AT5G66320                                                                                                                                                                                                                                                                                                                                                                         |
| -187 | FmatrixID_0042    | GATA; tify                     | - | 0.95 | attGATCTaa        | AT5G25830                                                                                                                                                                                                                                                                                                                                                                                                                 |
| -187 | FmatrixID_0264    | GATA; tify                     | - | 1    | attGATCTaa        | AT2G45050;AT3G24050;AT5G25830;AT5G66320                                                                                                                                                                                                                                                                                                                                                                                   |
| -187 | FmatrixID_0267    | GATA; tify                     | - | 0.99 | attGATCTaa        | AT2G28340;AT2G45050;AT3G60530;AT5G25830;AT5G66320                                                                                                                                                                                                                                                                                                                                                                         |
| -187 | FmatrixID_0271    | GATA; tify                     | + | 0.97 | attGATCTaa        | AT2G45050;AT3G45170;AT4G36240;AT5G25830;AT5G66320                                                                                                                                                                                                                                                                                                                                                                         |
| -187 | TF_motif_seq_0257 | NF-YB,NF-YA,NF-YC              | - | 0.8  | ATTGA             | AT1G09030;AT1G17590;AT1G21970;AT1G30500;AT1G54160;AT1G54830;AT1G56170;AT1G72830;AT2G38880;AT2G47810;AT3G05690;AT3G14020;AT3G20910;AT3G53340;AT4G14540;AT5G06510;AT5G12840;AT5G27910;AT5G38140;AT5G47640;AT5G47670;AT3G21175;AT4G24470                                                                                                                                                                                     |
| -186 | FmatrixID_0263    | GATA                           | - | 1    | ttGATCT           | AT3G14230                                                                                                                                                                                                                                                                                                                                                                                                                 |
| -186 | FmatrixID_0266    | GATA; tify                     | + | 0.99 | ttGATCTaa         | AT2G28340;AT2G45050;AT3G54810;AT5G25830;AT5G66320                                                                                                                                                                                                                                                                                                                                                                         |
| -186 | TF_motif_seq_0254 | AP2;ERF                        | - | 0.8  | TTGAT             | AT3G14230                                                                                                                                                                                                                                                                                                                                                                                                                 |
| -186 | FmatrixID_0934    | GATA; tify                     | + | 0.9  | ttGATCTaaacagca   | AT5G25830                                                                                                                                                                                                                                                                                                                                                                                                                 |
| -186 | TF_motif_seq_0275 | (Motif sequence only)          | + | 0.8  | TTGAT             | WBXPATNPR1                                                                                                                                                                                                                                                                                                                                                                                                                |
| -185 | TF_motif_seq_0237 | GATA; tify                     | + | 1    | TGATC             | AT1G51600;AT2G45050;AT3G06740;AT3G16870;AT3G21175;AT3G24050;AT3G54810;AT3G60530;AT4G17570;AT4G24470;AT4G26150;AT4G32890;AT4G34680;AT5G25830;AT5G26930;AT5G56860;AT5G66320;AT2G18380;AT3G50870;AT4G36620                                                                                                                                                                                                                   |
| -184 | TF_motif_seq_0237 | GATA; tify                     | - | 1    | GATCT             | AT1G51600;AT2G45050;AT3G06740;AT3G16870;AT3G21175;AT3G24050;AT3G54810;AT3G60530;AT4G17570;AT4G24470;AT4G26150;AT4G32890;AT4G34680;AT5G25830;AT5G26930;AT5G56860;AT5G66320;AT2G18380;AT3G50870;AT4G36620                                                                                                                                                                                                                   |
| -183 | TF_motif_seq_0254 | AP2;ERF                        | + | 1    | ATCTA             | AT3G14230                                                                                                                                                                                                                                                                                                                                                                                                                 |
| -178 | TF_motif_seq_0248 | (Motif sequence only)          | + | 0.8  | AACAG             | MYBCoreATCYCB1                                                                                                                                                                                                                                                                                                                                                                                                            |
| -176 | FmatrixID_0627    | Homeodomain; bZIP; HD-ZIP; WOX | + | 0.95 | cagCAATCaa        | AT4G35550                                                                                                                                                                                                                                                                                                                                                                                                                 |
| -174 | FmatrixID_0283    | Homeodomain; HD-ZIP            | - | 0.97 | gcAATCAaga        | AT2G22800;AT2G44910;AT4G16780;AT4G37790;AT5G06710;AT5G47370                                                                                                                                                                                                                                                                                                                                                               |
| -174 | FmatrixID_0284    | Homeodomain; HD-ZIP            | - | 0.95 | gcAATCAaga        | AT2G46680                                                                                                                                                                                                                                                                                                                                                                                                                 |
| -174 | FmatrixID_0286    | Homeodomain; HD-ZIP            | - | 1    | gcAATCaa          | AT2G22800;AT3G60390;AT4G16780;AT4G37790;AT5G06710;AT5G47370                                                                                                                                                                                                                                                                                                                                                               |
| -174 | FmatrixID_0291    | Homeodomain; bZIP; HD-ZIP; WOX | - | 0.92 | gcAATCaa          | AT4G35550                                                                                                                                                                                                                                                                                                                                                                                                                 |
| -174 | FmatrixID_0299    | Homeodomain; WOX               | - | 0.99 | gcAATCaa          | AT1G20700;AT1G20710                                                                                                                                                                                                                                                                                                                                                                                                       |
| -174 | TF_motif_seq_0257 | NF-YB,NF-YA,NF-YC              | + | 0.8  | GCAAT             | AT1G09030;AT1G17590;AT1G21970;AT1G30500;AT1G54160;AT1G54830;AT1G56170;AT1G72830;AT2G38880;AT2G47810;AT3G05690;AT3G14020;AT3G20910;AT3G53340;AT4G14540;AT5G06510;AT5G12840;AT5G27910;AT5G38140;AT5G47640;AT5G47670;AT1G51600;AT2G45050;AT3G06740;AT3G16870;AT3G21175;AT3G24050;AT3G54810;AT3G60530;AT4G17570;AT4G24470;AT4G26150;AT4G32890;AT4G34680;AT5G25830;AT5G26930;AT5G56860;AT5G66320;AT2G18380;AT3G50870;AT4G36620 |
| -172 | TF_motif_seq_0237 | GATA; tify                     | - | 1    | AATCA             | ARR1AT                                                                                                                                                                                                                                                                                                                                                                                                                    |
| -172 | TF_motif_seq_0268 | (Motif sequence only)          | - | 1    | AATCA             |                                                                                                                                                                                                                                                                                                                                                                                                                           |
| -171 | TF_motif_seq_0254 | AP2;ERF                        | + | 0.8  | ATCAA             | AT3G14230                                                                                                                                                                                                                                                                                                                                                                                                                 |
| -171 | TF_motif_seq_0275 | (Motif sequence only)          | - | 0.8  | ATCAA             | WBXPATNPR1                                                                                                                                                                                                                                                                                                                                                                                                                |
| -166 | TF_motif_seq_0261 | (Motif sequence only)          | + | 0.8  | GAGAG             | SURECOREATSULTR11                                                                                                                                                                                                                                                                                                                                                                                                         |
| -163 | FmatrixID_0358    | Myb/SANT                       | + | 0.99 | agtGGAATCg        | AT5G18240                                                                                                                                                                                                                                                                                                                                                                                                                 |
| -163 | TF_motif_seq_0257 | NF-YB,NF-YA,NF-YC              | - | 0.8  | AGTGG             | AT1G09030;AT1G17590;AT1G21970;AT1G30500;AT1G54160;AT1G54830;AT1G56170;AT1G72830;AT2G38880;AT2G47810;AT3G05690;AT3G14020;AT3G20910;AT3G53340;AT4G14540;AT5G06510;AT5G12840;AT5G27910;AT5G38140;AT5G47640;AT5G47670;AT1G68550                                                                                                                                                                                               |
| -162 | FmatrixID_0758    | AP2;ERF                        | + | 0.86 | gtgGAATCgatgaatcg |                                                                                                                                                                                                                                                                                                                                                                                                                           |
| -162 | TF_motif_seq_0263 | (Motif sequence only)          | - | 0.8  | GTGGA             | SORLP1AT                                                                                                                                                                                                                                                                                                                                                                                                                  |
| -160 | FmatrixID_1028    | Myb/SANT; G2-like              | - | 0.86 | gGAATCgatgaatcg   | AT1G49560                                                                                                                                                                                                                                                                                                                                                                                                                 |
| -160 | FmatrixID_1047    | Myb/SANT                       | - | 0.86 | gGAATCgatgaatcg   | AT2G03900                                                                                                                                                                                                                                                                                                                                                                                                                 |

|      |                   |                                |   |      |                            |                                                                                    |
|------|-------------------|--------------------------------|---|------|----------------------------|------------------------------------------------------------------------------------|
| -158 | TF_motif_seq_0237 | GATA; tify                     | - | 1    | AATCG                      | AT1G51600;AT2G45050;AT3G06740;AT3G16870;AT3G21175;AT3G24050;AT3G54810;             |
| -158 | TF_motif_seq_0268 | (Motif sequence only)          | - | 1    | AATCG                      | AT3G60530;AT4G17570;AT4G24470;AT4G26150;AT4G32890;AT4G34680;AT5G25830;             |
| -157 | TF_motif_seq_0254 | AP2; ERF                       | + | 0.8  | ATCGA                      | AT5G26930;AT5G56860;AT5G66320;AT2G18380;AT3G50870;AT4G36620                        |
| -156 | TF_motif_seq_0254 | AP2; ERF                       | + | 0.8  | TCGAT                      | ARR1AT<br>AT3G14230<br>AT3G14230                                                   |
| -155 | TF_motif_seq_0237 | GATA; tify                     | + | 1    | CGATG                      | AT1G51600;AT2G45050;AT3G06740;AT3G16870;AT3G21175;AT3G24050;AT3G54810;             |
| -150 | TF_motif_seq_0237 | GATA; tify                     | - | 1    | AATCG                      | AT3G60530;AT4G17570;AT4G24470;AT4G26150;AT4G32890;AT4G34680;AT5G25830;             |
| -150 | TF_motif_seq_0268 | (Motif sequence only)          | - | 1    | AATCG                      | AT5G26930;AT5G56860;AT5G66320;AT2G18380;AT3G50870;AT4G36620                        |
| -149 | TF_motif_seq_0254 | AP2; ERF                       | + | 0.8  | ATCGA                      | AT1G51600;AT2G45050;AT3G06740;AT3G16870;AT3G21175;AT3G24050;AT3G54810;             |
| -148 | TFmatrixID_0604   | B3                             | + | 0.96 | tccaTGATGA                 | AT3G60530;AT4G17570;AT4G24470;AT4G26150;AT4G32890;AT4G34680;AT5G25830;             |
| -148 | TF_motif_seq_0254 | AP2; ERF                       | - | 0.8  | TCGAT                      | AT5G26930;AT5G56860;AT5G66320;AT2G18380;AT3G50870;AT4G36620                        |
| -148 | TF_motif_seq_0052 | (Motif sequence only)          | - | 0.7  | tccatGTAGA                 | ARR1AT<br>AT3G14230                                                                |
| -147 | TF_motif_seq_0237 | GATA; tify                     | + | 1    | CGATG                      | LSSATPR1<br>AT1G51600;AT2G45050;AT3G06740;AT3G16870;AT3G21175;AT3G24050;AT3G54810; |
| -145 | TF_motif_seq_0254 | AP2; ERF                       | + | 0.8  | ATGTA                      | AT3G60530;AT4G17570;AT4G24470;AT4G26150;AT4G32890;AT4G34680;AT5G25830;             |
| -142 | TF_motif_seq_0254 | AP2; ERF                       | - | 0.8  | TAGAG                      | AT5G26930;AT5G56860;AT5G66320;AT2G18380;AT3G50870;AT4G36620                        |
| -140 | TF_motif_seq_0261 | (Motif sequence only)          | + | 0.8  | GAGAA                      | AT3G14230                                                                          |
| -138 | TF_motif_seq_0267 | Trihelix                       | + | 0.8  | GAAAC                      | SURECOREATSULTR11                                                                  |
| -138 | TF_motif_seq_0261 | (Motif sequence only)          | + | 0.8  | GAAAC                      | AT5G01380                                                                          |
| -137 | TFmatrixID_0968   | C2H2                           | + | 0.98 | aaACTGaaact                | SURECOREATSULTR11                                                                  |
| -136 | TF_motif_seq_0248 | (Motif sequence only)          | + | 0.8  | AACTG                      | AT1G13400                                                                          |
| -135 | TFmatrixID_0912   | Dof                            | - | 0.85 | actgaaactgagaagaAAAAGtgccg | MYBcreatcyC1                                                                       |
| -133 | TFmatrixID_0918   | Dof                            | + | 0.92 | tgaaactgagaagaAAAAGTt      | AT1G69570                                                                          |
| -132 | TF_motif_seq_0267 | Trihelix                       | - | 0.8  | GAAAC                      | AT1G69570                                                                          |
| -132 | TF_motif_seq_0261 | (Motif sequence only)          | + | 0.8  | GAAAC                      | AT5G01380                                                                          |
| -130 | TF_motif_seq_0248 | (Motif sequence only)          | + | 0.8  | AACTG                      | SURECOREATSULTR11                                                                  |
| -129 | TFmatrixID_0900   | Dof                            | - | 0.94 | actgagaagaAAAAGTg          | MYBcreatcyC1                                                                       |
| -127 | TFmatrixID_0903   | Dof                            | - | 0.93 | tgagaagaAAAAGTgccc         | AT3G45610                                                                          |
| -127 | TFmatrixID_0922   | Dof                            | + | 0.93 | tgagaagaAAAAGTgccc         | AT5G02460                                                                          |
| -126 | TFmatrixID_0914   | Dof                            | + | 0.98 | gagaagaAAAAGTg             | AT1G51700                                                                          |
| -126 | TF_motif_seq_0261 | (Motif sequence only)          | + | 0.8  | GAGAA                      | AT2G37590                                                                          |
| -125 | TFmatrixID_0890   | Dof                            | - | 0.96 | agaagaAAAAGTg              | SURECOREATSULTR11                                                                  |
| -124 | TFmatrixID_0986   | C3H Zinc finger                | + | 0.97 | gaagaAAAAGTg               | AT2G28810                                                                          |
| -122 | TFmatrixID_0238   | Dof                            | + | 1    | agaAAAAGt                  | AT3G2130                                                                           |
| -121 | TFmatrixID_0031   | Dof                            | + | 0.98 | gaAAAAGTg                  | AT4G38000                                                                          |
| -121 | TFmatrixID_0233   | Dof                            | + | 1    | gaAAAAGTg                  | AT2G46590                                                                          |
| -121 | TFmatrixID_0235   | Dof                            | + | 1    | gaAAAAGTg                  | AT1G64620                                                                          |
| -121 | TFmatrixID_0239   | Dof                            | + | 0.99 | gaAAAAGTg                  | AT3G21270                                                                          |
| -121 | TFmatrixID_0240   | Dof                            | + | 1    | gaAAAAG                    | AT5G39660                                                                          |
| -121 | TFmatrixID_0243   | Dof                            | + | 1    | gaAAAAGTg                  | AT5G60200                                                                          |
| -121 | TFmatrixID_0896   | Dof                            | + | 0.97 | gaAAAAGTg                  | AT5G62940                                                                          |
| -121 | TFmatrixID_0905   | Dof                            | + | 0.96 | gaAAAAGTg                  | AT1G64620                                                                          |
| -121 | TFmatrixID_0911   | Dof                            | + | 0.95 | gaAAAAGTgccc               | AT2G46590                                                                          |
| -121 | TFmatrixID_0917   | Dof                            | + | 0.98 | gaAAAAGTg                  | AT2G46590                                                                          |
| -121 | TFmatrixID_0920   | Dof                            | + | 0.98 | gaAAAAGTg                  | AT3G52440                                                                          |
| -121 | TFmatrixID_0985   | C3H Zinc finger                | + | 0.97 | gaAAAAGTg                  | AT4G38000                                                                          |
| -121 | TFmatrixID_0988   | C3H Zinc finger                | + | 0.96 | gaAAAAGTg                  | AT5G63260                                                                          |
| -121 | TF_motif_seq_0321 | (Motif sequence only)          | + | 1    | GAAAa                      | AT5G63260                                                                          |
| -120 | TFmatrixID_0234   | Dof                            | + | 1    | aaaAAGt                    | GT1CONSENSUS                                                                       |
| -120 | TFmatrixID_0237   | Dof                            | + | 0.99 | aaaAAGTg                   | AT2G37590                                                                          |
| -120 | TFmatrixID_1544   | Dof                            | + | 1    | aaaAAGTg                   | AT3G47500                                                                          |
| -118 | TF_motif_seq_0239 | Dof                            | + | 1    | AAAGT                      | AT1G64620                                                                          |
| -115 | TF_motif_seq_0267 | Trihelix                       | + | 0.8  | GTTGC                      | AT1G29160;AT1G64620;AT2G37590;AT3G21270;AT3G45610;AT3G47500;AT4G38000;             |
| -115 | TF_motif_seq_0263 | (Motif sequence only)          | + | 0.8  | GTTGC                      | AT5G39660;AT5G60200;AT5G60850;AT5G62940;AT2G46590;AT1G07640;AT1G21340;             |
| -112 | TF_motif_seq_0285 | CG-1; CAMTA; CAMTA             | + | 1    | GCCGG                      | AT1G62790;AT1G47655;AT1G51700;AT1G69570;AT2G28510;AT2G28810;AT2G3140;              |
| -112 | TF_motif_seq_0285 | CG-1; CAMTA; CAMTA             | - | 1    | gCCGG                      | AT3G50410;AT3G55370;AT3G61850;AT4G00940;AT4G21050;AT4G21080;AT4G24060;             |
| -112 | TF_motif_seq_0340 | (Motif sequence only)          | + | 1    | GCCGG                      | AT5G01380                                                                          |
| -112 | TF_motif_seq_0340 | (Motif sequence only)          | - | 1    | gCCGG                      | SORLP1AT                                                                           |
| -111 | TF_motif_seq_0510 | (Motif sequence only)          | - | 0.85 | cgCGGAta                   | AT2G22300;AT5G64220;AT1G67310;AT3G16940;AT5G09410                                  |
| -110 | TFmatrixID_0339   | Myb/SANT                       | + | 0.93 | gCGGATAc                   | AT2G22300;AT5G64220;AT1G67310;AT3G16940;AT5G09410                                  |
| -107 | TF_motif_seq_0237 | GATA; tify                     | + | 1    | GGATA                      | CGCBXAT<br>CGCBXAT<br>EZFAT<br>AT1G74840                                           |
| -106 | TF_motif_seq_0243 | GATA; tify                     | + | 1    | GATAC                      | AT1G51600;AT2G45050;AT3G06740;AT3G16870;AT3G21175;AT3G24050;AT3G54810;             |
| -106 | TF_motif_seq_0267 | Trihelix                       | + | 0.8  | GATAC                      | AT3G60530;AT4G17570;AT4G24470;AT4G26150;AT4G32890;AT4G34680;AT5G25830;             |
| -106 | TF_motif_seq_0261 | (Motif sequence only)          | + | 0.8  | GATAC                      | AT5G26930;AT5G56860;AT5G66320;AT2G18380;AT3G50870;AT4G36620                        |
| -102 | TF_motif_seq_0257 | NF-YB;NF-YA;NF-YC              | + | 0.8  | CCAAA                      | AT1G51600;AT2G45050;AT3G06740;AT3G16870;AT3G21175;AT3G24050;AT3G54810;             |
| -100 | TFmatrixID_1557   | bZIP                           | - | 0.91 | cctaGAGCctc                | AT1G69930;AT1G17590;AT1G21970;AT1G30500;AT1G54160;AT1G54830;AT1G56170;             |
| -98  | TFmatrixID_0199   | bZIP                           | - | 0.97 | caTGACGctc                 | AT1G72830;AT2G38880;AT2G47810;AT3G05690;AT3G14020;AT3G20910;AT3G53340;             |
| -98  | TFmatrixID_1504   | ZF-HD                          | - | 0.9  | calgagcctcTAATTattcc       | AT4G14540;AT5G06510;AT5G12840;AT5G27910;AT5G38140;AT5G47640;AT5G47670;             |
| -97  | TF_motif_seq_0014 | bZIP                           | + | 0.7  | ATGACgctc                  | AT1G08320                                                                          |
| -97  | TF_motif_seq_0275 | (Motif sequence only)          | + | 0.8  | ATGAC                      | caTGACGctc                                                                         |
| -97  | TFmatrixID_0196   | bZIP                           | - | 0.88 | ATGACGctc                  | AT5G39760                                                                          |
| -97  | TFmatrixID_1165   | Myb/SANT; MYB                  | - | 0.94 | atgaCGCTctaa               | AT5G06950                                                                          |
| -96  | TF_motif_seq_0080 | AP2; ERF                       | + | 0.73 | lgagcTCTTA                 | WBOXATNR1                                                                          |
| -96  | TF_motif_seq_0246 | Homeodomain; TALE              | + | 1    | TGACG                      | AT1G08320;AT1G68640;AT5G06839;AT5G06960                                            |
| -96  | TF_motif_seq_0271 | bZIP                           | + | 1    | TGACG                      | AT2G02820                                                                          |
| -96  | TFmatrixID_1513   | ZF-HD                          | + | 0.94 | lgagcctcTAATTa             | AT3G16770                                                                          |
| -92  | TFmatrixID_1504   | ZF-HD                          | + | 0.89 | gctcctAAATTTAttcctaatt     | AT1G23380;AT1G62360;AT1G70510;AT4G08150                                            |
| -92  | TFmatrixID_1505   | ZF-HD                          | + | 0.96 | ctctTAATTTattcc            | AT1G77920;AT3G12250;AT5G06950;AT5G06960;AT5G10030;AT5G65210;AT1G22070              |
| -91  | TFmatrixID_1511   | ZF-HD                          | - | 0.93 | ctctTAATTTattcc            | AT3G28920                                                                          |
| -91  | TFmatrixID_1514   | ZF-HD                          | - | 0.94 | ctctTAATTTattcc            | AT5G39760                                                                          |
| -90  | TFmatrixID_0058   | Homeodomain; bZIP; HD-ZIP      | + | 0.94 | tcttaATTATtcc              | AT5G65410                                                                          |
| -90  | TFmatrixID_0412   | Sox; YABBY                     | + | 1    | tcttaATTATt                | AT2G18350                                                                          |
| -90  | TFmatrixID_0540   | Homeodomain; HD-ZIP; bZIP      | - | 0.91 | tcttaATTATtcc              | AT2G18350                                                                          |
| -90  | TFmatrixID_1069   | WOX                            | + | 0.93 | tcTTAATTatt                | AT3G01470                                                                          |
| -90  | TFmatrixID_1088   | Homeodomain; bZIP; HD-ZIP      | - | 0.95 | tcttaATTATtcc              | AT3G01470                                                                          |
| -90  | TFmatrixID_1506   | ZF-HD                          | - | 0.99 | tcttaATTATt                | AT5G65410                                                                          |
| -90  | TFmatrixID_1508   | ZF-HD                          | - | 0.98 | tcttaATTATt                | AT5G39760                                                                          |
| -89  | TFmatrixID_0002   | AT-Hook                        | + | 0.97 | ctTAATTatt                 | AT5G3480                                                                           |
| -89  | TFmatrixID_0517   | Homeodomain; HD-ZIP; bZIP      | - | 0.93 | cttaaTTATtcc               | AT1G63480                                                                          |
| -89  | TFmatrixID_0628   | Homeodomain; bZIP; HD-ZIP; WOX | + | 0.96 | ctTAATtatt                 | AT1G69780;AT3G01220;AT3G01470;AT5G15150                                            |
| -89  | TFmatrixID_0628   | Homeodomain; bZIP; HD-ZIP; WOX | - | 0.96 | ctTAATtatt                 | AT4G35550                                                                          |
| -89  | TFmatrixID_1060   | bZIP; Homeodomain; HD-ZIP      | + | 0.92 | cttaaTTATtcc               | AT4G35550                                                                          |
| -89  | TFmatrixID_1507   | ZF-HD                          | - | 0.96 | ctTAATtttccta              | AT5G03790                                                                          |
| -89  | TFmatrixID_1510   | ZF-HD                          | - | 0.98 | ctTAATtttccta              | AT3G28920                                                                          |
| -89  | TFmatrixID_1512   | ZF-HD                          | - | 0.98 | ctTAATtttccta              | AT1G75240                                                                          |
| -88  | TF_motif_seq_0241 | ZF-HD                          | - | 1    | TAAAT                      | AT1G75240                                                                          |
| -88  | TFmatrixID_0047   | bZIP; Homeodomain; HD-ZIP      | + | 0.92 | ttaATTAtt                  | AT1G52150                                                                          |
| -88  | TFmatrixID_0412   | Sox; YABBY                     | + | 1    | ttaATTAtt                  | AT1G23420                                                                          |
| -88  | TFmatrixID_1057   | Homeodomain; bZIP; HD-ZIP      | - | 0.96 | ttaaTATTtcc                | AT5G65310                                                                          |
| -88  | TFmatrixID_1058   | bZIP; Homeodomain; HD-ZIP      | + | 0.87 | ttaaTATTtcc                | AT5G03790                                                                          |

|     |                    |                                  |   |      |                             |                                                                                                                                                                                                                                                                                                                                                                                                                                                                                                                                                                                                     |        |
|-----|--------------------|----------------------------------|---|------|-----------------------------|-----------------------------------------------------------------------------------------------------------------------------------------------------------------------------------------------------------------------------------------------------------------------------------------------------------------------------------------------------------------------------------------------------------------------------------------------------------------------------------------------------------------------------------------------------------------------------------------------------|--------|
| -88 | TfmatrixID_1062    | HD-ZIP                           | - | 0,95 | ttaaTTATTtc                 | AT5G66700                                                                                                                                                                                                                                                                                                                                                                                                                                                                                                                                                                                           |        |
| -88 | TfmatrixID_1073    | Homeodomain; HD-ZIP              | - | 0,98 | ttaaTTATTtc                 | AT1G69780                                                                                                                                                                                                                                                                                                                                                                                                                                                                                                                                                                                           |        |
| -88 | TfmatrixID_1078    | Homeodomain; HD-ZIP              | + | 0,96 | ttaaTTATTtc                 | AT3G01220                                                                                                                                                                                                                                                                                                                                                                                                                                                                                                                                                                                           |        |
| -88 | TfmatrixID_1086    | Homeodomain; HD-ZIP              | - | 0,97 | ttaaTTATTtc                 | AT1G69780                                                                                                                                                                                                                                                                                                                                                                                                                                                                                                                                                                                           |        |
| -88 | TfmatrixID_1087    | Homeodomain; HD-ZIP              | - | 0,93 | ttaaTTATTtc                 | AT2G22430                                                                                                                                                                                                                                                                                                                                                                                                                                                                                                                                                                                           |        |
| -88 | TfmatrixID_1089    | Homeodomain; bZIP; HD-ZIP        | - | 0,98 | ttaaTTATTtc                 | AT3G01470                                                                                                                                                                                                                                                                                                                                                                                                                                                                                                                                                                                           |        |
| -88 | TfmatrixID_1090    | Homeodomain; HD-ZIP              | - | 0,98 | ttaaTTATTtc                 | AT3G01220                                                                                                                                                                                                                                                                                                                                                                                                                                                                                                                                                                                           |        |
| -87 | TfmatrixID_0001    | AT-Hook                          | + | 0,99 | lAATTAttc                   | AT1G63480                                                                                                                                                                                                                                                                                                                                                                                                                                                                                                                                                                                           |        |
| -87 | TfmatrixID_0026    | bZIP; Homeodomain; HD-ZIP        | + | 0,94 | taATTAttc                   | AT5G03790                                                                                                                                                                                                                                                                                                                                                                                                                                                                                                                                                                                           | ATHB51 |
| -87 | TfmatrixID_0116    | Homeodomain; bZIP; HD-ZIP        | + | 0,92 | taaTTATTt                   | AT5G65310                                                                                                                                                                                                                                                                                                                                                                                                                                                                                                                                                                                           |        |
| -87 | TfmatrixID_0471    | Homeodomain; HD-ZIP; bZIP        | - | 0,99 | taATTAttc                   | AT1G69780;AT3G01220;AT3G01470;AT5G15150                                                                                                                                                                                                                                                                                                                                                                                                                                                                                                                                                             |        |
| -87 | TfmatrixID_1513    | ZF-HD                            | - | 0,95 | lAATTAttcctaat              | AT3G28920                                                                                                                                                                                                                                                                                                                                                                                                                                                                                                                                                                                           |        |
| -86 | TfmatrixID_0292    | Homeodomain; HD-ZIP              | + | 0,95 | aATTAttc                    | AT1G26960;AT1G69780;AT3G01220;AT4G40060;AT5G15150                                                                                                                                                                                                                                                                                                                                                                                                                                                                                                                                                   |        |
| -85 | Tf_matrix_seq_0241 | ZF-HD                            | + | 1    | ATTAT                       | AT1G75240                                                                                                                                                                                                                                                                                                                                                                                                                                                                                                                                                                                           |        |
| -85 | TfmatrixID_0146    | AT-Hook                          | - | 0,99 | ATTATtcc                    | AT4G21895;AT5G62260                                                                                                                                                                                                                                                                                                                                                                                                                                                                                                                                                                                 |        |
| -83 | TfmatrixID_1170    | Myb/SANT; MYB                    | + | 0,86 | tatttCCTAAAttatt            | AT3G53200                                                                                                                                                                                                                                                                                                                                                                                                                                                                                                                                                                                           |        |
| -82 | Tf_matrix_seq_0321 | (Motif sequence only)            | - | 1    | aTTCC                       | GT1CONSENSUS                                                                                                                                                                                                                                                                                                                                                                                                                                                                                                                                                                                        |        |
| -82 | TfmatrixID_1151    | MYB                              | + | 0,86 | atttCCTAAAttatt             | AT3G01530                                                                                                                                                                                                                                                                                                                                                                                                                                                                                                                                                                                           |        |
| -82 | TfmatrixID_1179    | Myb/SANT; MYB                    | - | 0,86 | atttCCTAAAttatt             | AT3G53200                                                                                                                                                                                                                                                                                                                                                                                                                                                                                                                                                                                           |        |
| -81 | TfmatrixID_1216    | Myb/SANT; MYB                    | - | 0,94 | tttCCTAAAttatt              | AT1G68320                                                                                                                                                                                                                                                                                                                                                                                                                                                                                                                                                                                           |        |
| -80 | TfmatrixID_1218    | Myb/SANT; MYB                    | - | 0,94 | ttCCTAAAttatt               | AT1G25340                                                                                                                                                                                                                                                                                                                                                                                                                                                                                                                                                                                           |        |
| -80 | TfmatrixID_1376    | AP2; B3; RAV                     | + | 0,94 | ttcctaattttttTGTTGt         | AT1G13260                                                                                                                                                                                                                                                                                                                                                                                                                                                                                                                                                                                           |        |
| -79 | TfmatrixID_1555    | MYB                              | + | 0,89 | lCCTAAAtt                   | AT3G01530                                                                                                                                                                                                                                                                                                                                                                                                                                                                                                                                                                                           | MYB57  |
| -77 | Tf_matrix_seq_0067 | HB-PHD                           | + | 0,73 | CTAAAttatt                  | AT4G29940                                                                                                                                                                                                                                                                                                                                                                                                                                                                                                                                                                                           |        |
| -77 | Tf_matrix_seq_0241 | ZF-HD                            | - | 1    | CTAAT                       | AT1G75240                                                                                                                                                                                                                                                                                                                                                                                                                                                                                                                                                                                           |        |
| -77 | Tf_matrix_seq_0257 | NF-YB;NF-YA;NF-YC                | + | 0,8  | CTAAT                       | AT1G09030;AT1G17590;AT1G21970;AT1G30500;AT1G54160;AT1G54830;AT1G56170;AT1G72830;AT2G38880;AT2G47810;AT3G05690;AT3G14020;AT3G20910;AT3G53340;AT4G14540;AT5G06510;AT5G12840;AT5G27910;AT5G38140;AT5G47640;AT5G47670;                                                                                                                                                                                                                                                                                                                                                                                  |        |
| -76 | TfmatrixID_0009    | AT-Hook                          | + | 1    | taattTATTt                  | AT4G35390                                                                                                                                                                                                                                                                                                                                                                                                                                                                                                                                                                                           |        |
| -76 | TfmatrixID_1375    | AP2; B3; RAV                     | + | 0,96 | taatttatttTGTTGt            | AT1G13260                                                                                                                                                                                                                                                                                                                                                                                                                                                                                                                                                                                           |        |
| -74 | Tf_matrix_seq_0254 | AP2; ERF                         | + | 0,8  | ATTTA                       | AT3G14230                                                                                                                                                                                                                                                                                                                                                                                                                                                                                                                                                                                           |        |
| -74 | TfmatrixID_0142    | AT-Hook                          | - | 1    | attTATTt                    | AT4G21895;AT5G62260                                                                                                                                                                                                                                                                                                                                                                                                                                                                                                                                                                                 |        |
| -73 | TfmatrixID_0131    | AT-Hook                          | - | 1    | TTTAtttt                    | AT1G19485;AT1G48610                                                                                                                                                                                                                                                                                                                                                                                                                                                                                                                                                                                 |        |
| -73 | TfmatrixID_0136    | AT-Hook                          | - | 1    | TTTAtttt                    | AT4G21895;AT5G62260                                                                                                                                                                                                                                                                                                                                                                                                                                                                                                                                                                                 |        |
| -73 | TfmatrixID_0138    | AT-Hook                          | - | 1    | ttTATTt                     | AT4G21895;AT5G62260                                                                                                                                                                                                                                                                                                                                                                                                                                                                                                                                                                                 |        |
| -70 | TfmatrixID_1221    | MYB                              | + | 0,99 | atttTGTTGt                  | AT5G40330                                                                                                                                                                                                                                                                                                                                                                                                                                                                                                                                                                                           | MYB23  |
| -69 | TfmatrixID_0089    | AP2; B3; RAV                     | - | 0,96 | ttttTGTTGt                  | AT1G13260                                                                                                                                                                                                                                                                                                                                                                                                                                                                                                                                                                                           |        |
| -67 | TfmatrixID_0127    | AP2; B3; RAV                     | - | 0,93 | ttTGTTGt                    | AT3G25730                                                                                                                                                                                                                                                                                                                                                                                                                                                                                                                                                                                           |        |
| -66 | TfmatrixID_0992    | C3H                              | + | 0,83 | lTGTTGt                     | AT5G42820                                                                                                                                                                                                                                                                                                                                                                                                                                                                                                                                                                                           |        |
| -65 | Tf_matrix_seq_0255 | AP2; RAV; B3                     | - | 1    | TGTTG                       | AT1G25560;AT1G13260                                                                                                                                                                                                                                                                                                                                                                                                                                                                                                                                                                                 |        |
| -64 | Tf_matrix_seq_0343 | (Motif sequence only)            | - | 0,86 | gtGTTT                      | ANAEIRO1CONSENSUS                                                                                                                                                                                                                                                                                                                                                                                                                                                                                                                                                                                   |        |
| -61 | TfmatrixID_0222    | CSD                              | - | 0,97 | gtTTTAt                     | AT2G21060;AT4G38680                                                                                                                                                                                                                                                                                                                                                                                                                                                                                                                                                                                 |        |
| -59 | TfmatrixID_0131    | AT-Hook                          | - | 1    | TTTAtcac                    | AT1G19485;AT1G48610                                                                                                                                                                                                                                                                                                                                                                                                                                                                                                                                                                                 |        |
| -59 | TfmatrixID_0953    | C2H2                             | - | 0,99 | tttatTCACTa                 | AT5G04390                                                                                                                                                                                                                                                                                                                                                                                                                                                                                                                                                                                           |        |
| -56 | TfmatrixID_0908    | Dof                              | + | 0,92 | attcactaAAAAggattat         | AT1G64620                                                                                                                                                                                                                                                                                                                                                                                                                                                                                                                                                                                           |        |
| -55 | Tf_matrix_seq_0275 | (Motif sequence only)            | + | 0,8  | TTCA                        | WBXKATNPR1                                                                                                                                                                                                                                                                                                                                                                                                                                                                                                                                                                                          |        |
| -54 | TfmatrixID_0924    | Dof                              | + | 0,94 | tcactaAAAAggattatta         | AT4G21030                                                                                                                                                                                                                                                                                                                                                                                                                                                                                                                                                                                           |        |
| -50 | TfmatrixID_0891    | Dof                              | + | 0,93 | taAAAAggattatt              | AT4G21080                                                                                                                                                                                                                                                                                                                                                                                                                                                                                                                                                                                           |        |
| -48 | TfmatrixID_1509    | ZF-HD                            | + | 0,86 | aaaaggATTAT                 | AT1G14687                                                                                                                                                                                                                                                                                                                                                                                                                                                                                                                                                                                           |        |
| -47 | Tf_matrix_seq_0239 | Dof                              | + | 1    | AAAGG                       | AT1G29160;AT1G64620;AT2G37590;AT3G21270;AT3G45610;AT3G47500;AT4G38000;AT5G39660;AT5G60200;AT5G60850;AT5G62940;AT2G46590;AT1G07640;AT1G21340;AT1G26790;AT1G47655;AT1G51700;AT1G69570;AT2G28510;AT2G28810;AT2G34140;AT3G50410;AT3G55370;AT3G61850;AT4G00940;AT4G21050;AT4G21080;AT4G24060;MYBCOREATCYCB1                                                                                                                                                                                                                                                                                              |        |
| -47 | Tf_matrix_seq_0248 | (Motif sequence only)            | + | 0,8  | AAAGG                       | AT1G29160;AT1G64620;AT2G37590;AT3G21270;AT3G45610;AT3G47500;AT4G38000;AT5G39660;AT5G60200;AT5G60850;AT5G62940;AT2G46590;AT1G07640;AT1G21340;AT1G26790;AT1G47655;AT1G51700;AT1G69570;AT2G28510;AT2G28810;AT2G34140;AT3G50410;AT3G55370;AT3G61850;AT4G00940;AT4G21050;AT4G21080;AT4G24060;AT1G51600;AT2G45050;AT3G06740;AT3G16870;AT3G21175;AT3G24050;AT3G54810;AT3G60530;AT4G17570;AT4G24470;AT4G26150;AT4G32890;AT4G34680;AT5G25830;AT5G26930;AT5G56860;AT5G66320;AT2G18380;AT3G50870;AT4G36620;AT2G01760;AT3G16857;AT4G16110;AT4G18020;AT4G31920;AT5G58080;AT1G67710;AT1G49190;AT2G25180;AT5G49240 |        |
| -44 | Tf_matrix_seq_0237 | GATA; tfy                        | + | 1    | GGATT                       | ARR1AT                                                                                                                                                                                                                                                                                                                                                                                                                                                                                                                                                                                              |        |
| -44 | Tf_matrix_seq_0252 | Myb/SANT; MYB; ARR-B; MYB; ARR-B | + | 1    | GGATT                       | AT4G14465                                                                                                                                                                                                                                                                                                                                                                                                                                                                                                                                                                                           |        |
| -44 | Tf_matrix_seq_0268 | (Motif sequence only)            | + | 1    | GGATT                       | AT1G75240                                                                                                                                                                                                                                                                                                                                                                                                                                                                                                                                                                                           |        |
| -43 | TfmatrixID_0006    | AT-Hook                          | + | 0,95 | gATTATtatt                  | AT3G13350                                                                                                                                                                                                                                                                                                                                                                                                                                                                                                                                                                                           |        |
| -42 | Tf_matrix_seq_0241 | ZF-HD                            | + | 1    | ATTAT                       | AT4G14465                                                                                                                                                                                                                                                                                                                                                                                                                                                                                                                                                                                           |        |
| -41 | TfmatrixID_0790    | ARID                             | + | 1    | TTATa                       | AT1G75240                                                                                                                                                                                                                                                                                                                                                                                                                                                                                                                                                                                           |        |
| -40 | TfmatrixID_0006    | AT-Hook                          | + | 0,96 | tATTATata                   | AT1G04880                                                                                                                                                                                                                                                                                                                                                                                                                                                                                                                                                                                           |        |
| -39 | Tf_matrix_seq_0241 | ZF-HD                            | + | 1    | ATTAT                       | AT1G19485;AT1G48610;AT4G17950                                                                                                                                                                                                                                                                                                                                                                                                                                                                                                                                                                       |        |
| -39 | TfmatrixID_0793    | ARID; Sox                        | + | 0,83 | attatTATAttatata            | AT1G04880                                                                                                                                                                                                                                                                                                                                                                                                                                                                                                                                                                                           |        |
| -38 | TfmatrixID_0130    | AT-Hook                          | + | 0,98 | ttatTATAtt                  | AT1G19485;AT1G48610;AT4G17950                                                                                                                                                                                                                                                                                                                                                                                                                                                                                                                                                                       |        |
| -38 | TfmatrixID_0788    | ARID; Sox                        | + | 0,94 | ttatTATAttatata             | AT1G04880                                                                                                                                                                                                                                                                                                                                                                                                                                                                                                                                                                                           |        |
| -38 | TfmatrixID_0790    | ARID                             | + | 1    | TTATa                       | AT3G13350                                                                                                                                                                                                                                                                                                                                                                                                                                                                                                                                                                                           |        |
| -38 | TfmatrixID_0915    | Dof                              | + | 0,91 | ttattatattatagttttCTTTTt    | AT4G38000                                                                                                                                                                                                                                                                                                                                                                                                                                                                                                                                                                                           |        |
| -37 | TfmatrixID_0004    | AT-Hook                          | - | 0,9  | tattATATa                   | AT4G14465                                                                                                                                                                                                                                                                                                                                                                                                                                                                                                                                                                                           |        |
| -37 | TfmatrixID_0006    | AT-Hook                          | + | 0,97 | lATTATa                     | AT4G14465                                                                                                                                                                                                                                                                                                                                                                                                                                                                                                                                                                                           |        |
| -37 | TfmatrixID_0008    | AT-Hook                          | - | 0,94 | tattATATa                   | AT4G35390                                                                                                                                                                                                                                                                                                                                                                                                                                                                                                                                                                                           |        |
| -37 | TfmatrixID_0139    | AT-Hook                          | + | 0,98 | tattATATa                   | AT4G21895;AT5G62260                                                                                                                                                                                                                                                                                                                                                                                                                                                                                                                                                                                 |        |
| -37 | TfmatrixID_0282    | Homeodomain                      | + | 1    | tattATATat                  | AT2G36610                                                                                                                                                                                                                                                                                                                                                                                                                                                                                                                                                                                           |        |
| -36 | Tf_matrix_seq_0241 | ZF-HD                            | + | 1    | ATTAT                       | AT1G75240                                                                                                                                                                                                                                                                                                                                                                                                                                                                                                                                                                                           |        |
| -36 | TfmatrixID_0146    | AT-Hook                          | - | 0,99 | ATTATa                      | AT4G21895;AT5G62260                                                                                                                                                                                                                                                                                                                                                                                                                                                                                                                                                                                 |        |
| -34 | Tf_matrix_seq_0254 | AP2; ERF                         | + | 0,8  | TATAT                       | AT3G14230                                                                                                                                                                                                                                                                                                                                                                                                                                                                                                                                                                                           |        |
| -34 | TfmatrixID_0644    | B3                               | + | 0,78 | tattatattagttttcTTTTtttta   | AT3G18990                                                                                                                                                                                                                                                                                                                                                                                                                                                                                                                                                                                           |        |
| -34 | TfmatrixID_0788    | ARID; Sox                        | + | 1    | tattatATAgttt               | AT1G04880                                                                                                                                                                                                                                                                                                                                                                                                                                                                                                                                                                                           |        |
| -34 | TfmatrixID_0793    | ARID; Sox                        | + | 1    | tattatATAgttt               | AT1G04880                                                                                                                                                                                                                                                                                                                                                                                                                                                                                                                                                                                           |        |
| -33 | TfmatrixID_0130    | AT-Hook                          | - | 0,98 | atatTATAa                   | AT1G19485;AT1G48610;AT4G17950                                                                                                                                                                                                                                                                                                                                                                                                                                                                                                                                                                       |        |
| -33 | TfmatrixID_0644    | B3                               | + | 0,79 | atattatattagttttcTTTTttttaa | AT3G18990                                                                                                                                                                                                                                                                                                                                                                                                                                                                                                                                                                                           |        |
| -33 | TfmatrixID_0894    | Dof                              | + | 0,93 | atattatattagttttcTTTTttttaa | AT5G66940                                                                                                                                                                                                                                                                                                                                                                                                                                                                                                                                                                                           |        |
| -32 | TfmatrixID_0644    | B3                               | + | 0,81 | tattatattagttttcTTTTtttaatt | AT3G18990                                                                                                                                                                                                                                                                                                                                                                                                                                                                                                                                                                                           |        |
| -32 | TfmatrixID_0895    | Dof                              | + | 0,95 | tattatattagttttcTTTTtttaatt | AT3G50410                                                                                                                                                                                                                                                                                                                                                                                                                                                                                                                                                                                           |        |
| -31 | Tf_matrix_seq_0241 | ZF-HD                            | + | 1    | ATTAT                       | AT1G75240                                                                                                                                                                                                                                                                                                                                                                                                                                                                                                                                                                                           |        |
| -31 | TfmatrixID_0146    | AT-Hook                          | - | 0,99 | ATTATag                     | AT4G21895;AT5G62260                                                                                                                                                                                                                                                                                                                                                                                                                                                                                                                                                                                 |        |
| -31 | TfmatrixID_0644    | B3                               | + | 0,8  | attatattagttttcTTTTtttaatt  | AT3G18990                                                                                                                                                                                                                                                                                                                                                                                                                                                                                                                                                                                           |        |
| -31 | TfmatrixID_0888    | Dof                              | - | 0,9  | attatattagttttcTTTTtt       | AT5G02460                                                                                                                                                                                                                                                                                                                                                                                                                                                                                                                                                                                           |        |
| -31 | TfmatrixID_0893    | Dof                              | + | 0,93 | attatattagttttcTTTTtt       | AT2G28810                                                                                                                                                                                                                                                                                                                                                                                                                                                                                                                                                                                           |        |
| -30 | TfmatrixID_0644    | B3                               | + | 0,79 | ttatattagttttcTTTTTtaattg   | AT3G18990                                                                                                                                                                                                                                                                                                                                                                                                                                                                                                                                                                                           |        |
| -29 | Tf_matrix_seq_0254 | AP2; ERF                         | - | 0,8  | TATAT                       | AT3G14230                                                                                                                                                                                                                                                                                                                                                                                                                                                                                                                                                                                           |        |
| -29 | TfmatrixID_0644    | B3                               | + | 0,79 | tatatagttttcTTTTTtaattg     | AT3G18990                                                                                                                                                                                                                                                                                                                                                                                                                                                                                                                                                                                           |        |
| -29 | TfmatrixID_0919    | Dof                              | + | 0,96 | tatatagttttcTTTTtt          | AT3G55370                                                                                                                                                                                                                                                                                                                                                                                                                                                                                                                                                                                           |        |
| -28 | Tf_matrix_seq_0254 | AP2; ERF                         | + | 0,8  | ATAA                        | AT3G14230                                                                                                                                                                                                                                                                                                                                                                                                                                                                                                                                                                                           |        |
| -26 | TfmatrixID_0909    | Dof                              | + | 0,97 | atagttttcTTTTtttta          | AT1G51700                                                                                                                                                                                                                                                                                                                                                                                                                                                                                                                                                                                           |        |
| -26 | TfmatrixID_1371    | (Others)                         | - | 0,95 | atagttttcTTTTtt             | AT3G21890                                                                                                                                                                                                                                                                                                                                                                                                                                                                                                                                                                                           |        |
| -25 | Tf_matrix_seq_0254 | AP2; ERF                         | - | 0,8  | TAGTT                       | AT3G14230                                                                                                                                                                                                                                                                                                                                                                                                                                                                                                                                                                                           |        |
| -25 | TfmatrixID_0897    | Dof                              | + | 0,96 | tagttttcTTTTtt              | AT2G37590                                                                                                                                                                                                                                                                                                                                                                                                                                                                                                                                                                                           |        |
| -25 | TfmatrixID_0899    | Dof                              | + | 0,98 | tagttttcTTTTtt              | AT3G45610                                                                                                                                                                                                                                                                                                                                                                                                                                                                                                                                                                                           |        |
| -25 | TfmatrixID_0902    | Dof                              | + | 0,95 | tagttttcTTTTtttttaa         | AT5G66940                                                                                                                                                                                                                                                                                                                                                                                                                                                                                                                                                                                           |        |
| -25 | TfmatrixID_0921    | Dof                              | + | 0,92 | tagttttcTTTTtt              | AT1G29160                                                                                                                                                                                                                                                                                                                                                                                                                                                                                                                                                                                           |        |
| -25 | TfmatrixID_0922    | Dof                              | - | 0,95 | tagttttcTTTTtttttaa         | AT1G51700                                                                                                                                                                                                                                                                                                                                                                                                                                                                                                                                                                                           |        |
| -25 | TfmatrixID_0924    | Dof                              | - | 0,93 | tagttttcTTTTtttttt          | AT4G21030                                                                                                                                                                                                                                                                                                                                                                                                                                                                                                                                                                                           |        |
| -24 | TfmatrixID_0892    | Dof                              | + | 0,95 | agttttcTTTTtttttaatt        | AT3G52440                                                                                                                                                                                                                                                                                                                                                                                                                                                                                                                                                                                           |        |
| -24 | TfmatrixID_0907    | Dof                              | + | 0,96 | agttttcTTTTtt               | AT5G60850                                                                                                                                                                                                                                                                                                                                                                                                                                                                                                                                                                                           |        |
| -24 | TfmatrixID_0916    | Dof                              | + | 0,96 | agttttcTTTTtt               | AT1G47655                                                                                                                                                                                                                                                                                                                                                                                                                                                                                                                                                                                           |        |
| -23 | TfmatrixID_0476    | AT-Hook                          | - | 0,97 | gTTTTcTTTTtttt              | AT1G48610                                                                                                                                                                                                                                                                                                                                                                                                                                                                                                                                                                                           |        |
| -23 | TfmatrixID_0503    | MADS box; MIKC                   | - | 0,9  | gTTTCTTTTTtttttaatt         | AT4G22950;AT5G10140;AT5G65050;AT5G65070;AT5G65080;AT1G77080;AT2G45650;AT3G57390;AT4G11880                                                                                                                                                                                                                                                                                                                                                                                                                                                                                                           | FLC    |

|     |                   |                                |   |      |                       |                                                                                                                                                                                                                                                                                                                                                                                                                           |
|-----|-------------------|--------------------------------|---|------|-----------------------|---------------------------------------------------------------------------------------------------------------------------------------------------------------------------------------------------------------------------------------------------------------------------------------------------------------------------------------------------------------------------------------------------------------------------|
| -23 | FmatrixID_0648    | B3                             | - | 0,89 | gttttcTTTTtttaa       | AT3G18990                                                                                                                                                                                                                                                                                                                                                                                                                 |
| -23 | FmatrixID_0889    | Dof                            | - | 0,97 | gttttcTTTTttttaa      | AT5G62940                                                                                                                                                                                                                                                                                                                                                                                                                 |
| -23 | FmatrixID_0903    | Dof                            | - | 0,96 | gttttcTTTTtttaa       | AT5G02460                                                                                                                                                                                                                                                                                                                                                                                                                 |
| -23 | FmatrixID_0906    | Dof                            | - | 0,97 | gttttcTTTTtttaa       | AT5G60850                                                                                                                                                                                                                                                                                                                                                                                                                 |
| -23 | FmatrixID_0908    | Dof                            | - | 0,97 | gttttcTTTTtttaa       | AT1G64620                                                                                                                                                                                                                                                                                                                                                                                                                 |
| -23 | FmatrixID_0910    | Dof                            | - | 0,94 | gttttcTTTTttttaa      | AT1G29160                                                                                                                                                                                                                                                                                                                                                                                                                 |
| -23 | FmatrixID_0911    | Dof                            | - | 0,95 | gttttcTTTTttt         | AT2G46590                                                                                                                                                                                                                                                                                                                                                                                                                 |
| -23 | FmatrixID_0912    | Dof                            | - | 0,93 | gttttcTTTTttttaagtatt | AT1G69570                                                                                                                                                                                                                                                                                                                                                                                                                 |
| -23 | FmatrixID_0913    | Dof                            | - | 0,92 | gttttcTTTTtttaa       | AT3G47500                                                                                                                                                                                                                                                                                                                                                                                                                 |
| -23 | FmatrixID_1377    | B3                             | - | 0,92 | gttttcTTTTttttaa      | AT1G49480                                                                                                                                                                                                                                                                                                                                                                                                                 |
| -22 | TF_motif_seq_0321 | (Motif sequence only)          | - | 1    | tTTTT                 | GT1CONSENSUS                                                                                                                                                                                                                                                                                                                                                                                                              |
| -22 | FmatrixID_0648    | B3                             | - | 0,88 | tttttcTTTTttta        | AT3G18990                                                                                                                                                                                                                                                                                                                                                                                                                 |
| -22 | FmatrixID_1331    | NAC                            | - | 0,91 | tttttcTTTTtttaagt     | AT4G01540                                                                                                                                                                                                                                                                                                                                                                                                                 |
| -22 | FmatrixID_1377    | B3                             | - | 0,91 | tttttcTTTTtttaagt     | AT1G49480                                                                                                                                                                                                                                                                                                                                                                                                                 |
| -21 | FmatrixID_0648    | B3                             | - | 0,89 | tttttcTTTTttta        | AT3G18990                                                                                                                                                                                                                                                                                                                                                                                                                 |
| -21 | FmatrixID_0890    | Dof                            | - | 0,99 | ttttTTTTttttt         | AT2G28810                                                                                                                                                                                                                                                                                                                                                                                                                 |
| -21 | FmatrixID_0896    | Dof                            | - | 0,98 | ttttTTTTttt           | AT1G64620                                                                                                                                                                                                                                                                                                                                                                                                                 |
| -21 | FmatrixID_0900    | Dof                            | - | 0,97 | ttttTTTTtttaagt       | AT3G45610                                                                                                                                                                                                                                                                                                                                                                                                                 |
| -21 | FmatrixID_0901    | Dof                            | - | 0,92 | ttttTTTTtttaagtgt     | AT3G55370                                                                                                                                                                                                                                                                                                                                                                                                                 |
| -21 | FmatrixID_0904    | Dof                            | - | 0,9  | ttttTTTTttta          | AT3G47500                                                                                                                                                                                                                                                                                                                                                                                                                 |
| -21 | FmatrixID_0905    | Dof                            | - | 0,96 | ttttTTTTttt           | AT2G46590                                                                                                                                                                                                                                                                                                                                                                                                                 |
| -21 | FmatrixID_0920    | Dof                            | - | 0,95 | ttttTTTTttt           | AT4G38000                                                                                                                                                                                                                                                                                                                                                                                                                 |
| -21 | FmatrixID_0986    | C3H Zinc finger                | - | 0,99 | ttttTTTTttttt         | AT3G12130                                                                                                                                                                                                                                                                                                                                                                                                                 |
| -21 | FmatrixID_0988    | C3H Zinc finger                | - | 0,95 | ttttTTTTttt           | AT5G63260                                                                                                                                                                                                                                                                                                                                                                                                                 |
| -21 | FmatrixID_1377    | B3                             | - | 0,88 | tttttcTTTTtttaagtgt   | AT1G49480                                                                                                                                                                                                                                                                                                                                                                                                                 |
| -21 | FmatrixID_1378    | B3                             | - | 0,93 | ttttTTTTttttt         | AT1G49480                                                                                                                                                                                                                                                                                                                                                                                                                 |
| -20 | FmatrixID_0648    | B3                             | - | 0,92 | tttttcTTTTtttaagt     | AT3G18990                                                                                                                                                                                                                                                                                                                                                                                                                 |
| -20 | FmatrixID_0914    | Dof                            | - | 0,95 | tttTTTTttta           | AT2G37590                                                                                                                                                                                                                                                                                                                                                                                                                 |
| -20 | FmatrixID_1377    | B3                             | - | 0,85 | tttTTTTtttaagtga      | AT1G49480                                                                                                                                                                                                                                                                                                                                                                                                                 |
| -19 | FmatrixID_0648    | B3                             | - | 0,92 | tttttcTTTTtttaagtgt   | AT3G18990                                                                                                                                                                                                                                                                                                                                                                                                                 |
| -19 | FmatrixID_0918    | Dof                            | - | 0,94 | ttTTTTttttaagtgtat    | AT1G69570                                                                                                                                                                                                                                                                                                                                                                                                                 |
| -19 | FmatrixID_1378    | B3                             | - | 0,94 | ttttTTTTttta          | AT1G49480                                                                                                                                                                                                                                                                                                                                                                                                                 |
| -18 | TF_motif_seq_0239 | Dof                            | - | 1    | TC                    | AT1G29160;AT1G64620;AT2G37590;AT3G21270;AT3G45610;AT3G47500;AT4G38000;AT5G39660;AT5G60200;AT5G60850;AT5G62940;AT2G46590;AT1G07640;AT1G21340;AT1G26790;AT1G47655;AT1G51700;AT1G69570;AT2G28510;AT2G28810;AT2G34140;AT3G50410;AT3G55370;AT3G61850;AT4G00940;AT4G21050;AT4G21080;AT4G24060;                                                                                                                                  |
| -18 | FmatrixID_1378    | B3                             | - | 0,93 | ttttTTTTttta          | AT1G49480                                                                                                                                                                                                                                                                                                                                                                                                                 |
| -10 | FmatrixID_0792    | ARID                           | - | 0,89 | tttTAATgattt          | AT2G17410                                                                                                                                                                                                                                                                                                                                                                                                                 |
| -8  | TF_motif_seq_0241 | ZF-HD                          | - | 1    | TTAAT                 | AT1G75240                                                                                                                                                                                                                                                                                                                                                                                                                 |
| -5  | TF_motif_seq_0257 | NF-YB;NF-YA;NF-YC              | - | 0,8  | ATTGT                 | AT1G09030;AT1G17590;AT1G21970;AT1G30500;AT1G54160;AT1G54830;AT1G56170;AT1G72830;AT2G38880;AT2G47810;AT3G05690;AT3G14020;AT3G20910;AT3G53340;AT4G14540;AT5G06510;AT5G12840;AT5G27910;AT5G38140;AT5G47640;AT5G47670;                                                                                                                                                                                                        |
| 2   | TF_motif_seq_0321 | (Motif sequence only)          | - | 1    | tTTTT                 | GT1CONSENSUS                                                                                                                                                                                                                                                                                                                                                                                                              |
| 3   | TF_motif_seq_0321 | (Motif sequence only)          | - | 1    | tTTTT                 | GT1CONSENSUS                                                                                                                                                                                                                                                                                                                                                                                                              |
| 7   | FmatrixID_1230    | Myb/SANT                       | - | 0,98 | ctcgaAATATctaa        | AT3G10113                                                                                                                                                                                                                                                                                                                                                                                                                 |
| 8   | FmatrixID_1231    | Myb-related                    | - | 0,98 | ctcgaAATATctaa        | AT5G17300                                                                                                                                                                                                                                                                                                                                                                                                                 |
| 8   | FmatrixID_1241    | Myb/SANT; MYB-related          | - | 0,97 | ctcgaAATATct          | AT5G52660                                                                                                                                                                                                                                                                                                                                                                                                                 |
| 8   | FmatrixID_1247    | Myb/SANT; MYB-related          | - | 0,97 | ctcgaAATATct          | AT3G09600                                                                                                                                                                                                                                                                                                                                                                                                                 |
| 9   | FmatrixID_1232    | Myb/SANT; MYB-related          | - | 0,97 | tcgaaAATATct          | AT1G18330                                                                                                                                                                                                                                                                                                                                                                                                                 |
| 9   | FmatrixID_1236    | Myb/SANT; MYB-related          | - | 0,97 | tcgaaAATATct          | AT3G09600                                                                                                                                                                                                                                                                                                                                                                                                                 |
| 9   | FmatrixID_1242    | Myb/SANT; MYB-related          | - | 0,99 | tcgaaAATATct          | AT1G01060                                                                                                                                                                                                                                                                                                                                                                                                                 |
| 9   | FmatrixID_1243    | Myb/SANT; MYB-related          | - | 0,98 | tcgaaAATATct          | AT4G01280                                                                                                                                                                                                                                                                                                                                                                                                                 |
| 9   | FmatrixID_1249    | Myb/SANT; MYB-related          | - | 0,96 | tcgaaAATATct          | AT4G01280                                                                                                                                                                                                                                                                                                                                                                                                                 |
| 9   | FmatrixID_1258    | Myb/SANT; MYB-related          | - | 0,96 | tcgaaAATATct          | AT5G52660                                                                                                                                                                                                                                                                                                                                                                                                                 |
| 9   | FmatrixID_1261    | Myb/SANT; MYB-related          | - | 0,97 | tcgaaAATATct          | AT5G02840                                                                                                                                                                                                                                                                                                                                                                                                                 |
| 10  | FmatrixID_1229    | Myb/SANT; MYB-related          | - | 0,96 | cgaaAATATctaa         | AT1G18330                                                                                                                                                                                                                                                                                                                                                                                                                 |
| 10  | FmatrixID_1237    | Myb/SANT; MYB-related          | - | 0,98 | cgaaAATATct           | AT1G01060                                                                                                                                                                                                                                                                                                                                                                                                                 |
| 10  | FmatrixID_1244    | Myb-related                    | - | 1    | cgaaAATATct           | AT5G17300                                                                                                                                                                                                                                                                                                                                                                                                                 |
| 10  | FmatrixID_1255    | Myb/SANT; MYB-related          | - | 0,95 | cgaaAATATct           | AT5G02840                                                                                                                                                                                                                                                                                                                                                                                                                 |
| 10  | FmatrixID_1366    | (Others)                       | - | 0,99 | cgaaAATATct           | AT2G28920                                                                                                                                                                                                                                                                                                                                                                                                                 |
| 11  | FmatrixID_0029    | MYB-related                    | - | 0,98 | gaaAATATcta           | AT2G46830                                                                                                                                                                                                                                                                                                                                                                                                                 |
| 11  | FmatrixID_0334    | Myb/SANT; MYB-related          | - | 1    | gaaAATATcta           | AT1G18330;AT3G10113                                                                                                                                                                                                                                                                                                                                                                                                       |
| 11  | FmatrixID_0609    | MYB-related                    | - | 0,97 | gaaAATATcta           | AT5G17300                                                                                                                                                                                                                                                                                                                                                                                                                 |
| 11  | FmatrixID_1517    | Myb/SANT; MYB-related          | - | 1    | gaaAATATcta           | AT1G18330                                                                                                                                                                                                                                                                                                                                                                                                                 |
| 11  | FmatrixID_1521    | Myb/SANT; MYB-related          | - | 1    | gaaAATATcta           | AT3G09600                                                                                                                                                                                                                                                                                                                                                                                                                 |
| 11  | FmatrixID_1522    | Myb/SANT; MYB-related          | - | 1    | gaaAATATcta           | AT4G01280                                                                                                                                                                                                                                                                                                                                                                                                                 |
| 12  | FmatrixID_0320    | Myb/SANT; MYB-related          | - | 1    | aaATATcta             | AT1G01520;AT3G09600;AT4G01280;AT5G02840;AT5G52660                                                                                                                                                                                                                                                                                                                                                                         |
| 12  | FmatrixID_0364    | Myb/SANT; MYB-related          | - | 1    | aaATATcta             | AT3G09600;AT4G01280                                                                                                                                                                                                                                                                                                                                                                                                       |
| 12  | FmatrixID_0369    | Myb/SANT; MYB-related          | - | 1    | aaATATcta             | AT1G01060;AT5G37260                                                                                                                                                                                                                                                                                                                                                                                                       |
| 12  | FmatrixID_0610    | MYB-related                    | - | 1    | aaATATcta             | AT5G17300                                                                                                                                                                                                                                                                                                                                                                                                                 |
| 13  | FmatrixID_1525    | Myb/SANT; MYB-related          | - | 1    | aaATATcta             | AT5G52660                                                                                                                                                                                                                                                                                                                                                                                                                 |
| 14  | TF_motif_seq_0243 | GATA; tify                     | - | 1    | ATATC                 | AT1G51600;AT2G45050;AT3G06740;AT3G16870;AT3G21175;AT3G24050;AT3G54810;AT3G60530;AT4G17570;AT4G24470;AT4G26150;AT4G32890;AT4G34680;AT5G25830;AT5G26930;AT5G56860;AT5G66320;AT2G18380;AT3G50870;AT4G36620                                                                                                                                                                                                                   |
| 15  | TF_motif_seq_0237 | GATA; tify                     | - | 1    | TATCT                 | AT1G51600;AT2G45050;AT3G06740;AT3G16870;AT3G21175;AT3G24050;AT3G54810;AT3G60530;AT4G17570;AT4G24470;AT4G26150;AT4G32890;AT4G34680;AT5G25830;AT5G26930;AT5G56860;AT5G66320;AT2G18380;AT3G50870;AT4G36620                                                                                                                                                                                                                   |
| 16  | TF_motif_seq_0254 | AP2; ERF                       | - | 1    | ATCTA                 | AT3G14230                                                                                                                                                                                                                                                                                                                                                                                                                 |
| 18  | TF_motif_seq_0241 | ZF-HD                          | - | 1    | CTAAT                 | AT1G75240                                                                                                                                                                                                                                                                                                                                                                                                                 |
| 18  | TF_motif_seq_0257 | NF-YB;NF-YA;NF-YC              | - | 0,8  | CTAAT                 | AT1G09030;AT1G17590;AT1G21970;AT1G30500;AT1G54160;AT1G54830;AT1G56170;AT1G72830;AT2G38880;AT2G47810;AT3G05690;AT3G14020;AT3G20910;AT3G53340;AT4G14540;AT5G06510;AT5G12840;AT5G27910;AT5G38140;AT5G47640;AT5G47670;AT1G51600;AT2G45050;AT3G06740;AT3G16870;AT3G21175;AT3G24050;AT3G54810;AT3G60530;AT4G17570;AT4G24470;AT4G26150;AT4G32890;AT4G34680;AT5G25830;AT5G26930;AT5G56860;AT5G66320;AT2G18380;AT3G50870;AT4G36620 |
| 20  | TF_motif_seq_0237 | GATA; tify                     | - | 1    | AATCC                 | AT2G01760;AT3G16857;AT4G16110;AT4G18020;AT4G31920;AT5G50800;AT1G67710;AT1G49190;AT2G25180;AT5G49240                                                                                                                                                                                                                                                                                                                       |
| 20  | TF_motif_seq_0252 | Myb/SANT; MYB; ARR-B;MYB;ARR-B | - | 1    | AATCC                 | RRR1AT                                                                                                                                                                                                                                                                                                                                                                                                                    |
| 20  | TF_motif_seq_0268 | (Motif sequence only)          | - | 1    | AATCC                 | AT3G14230                                                                                                                                                                                                                                                                                                                                                                                                                 |
| 21  | TF_motif_seq_0254 | AP2; ERF                       | - | 0,8  | ATCCA                 | SORLIP1AT                                                                                                                                                                                                                                                                                                                                                                                                                 |
| 22  | TF_motif_seq_0263 | (Motif sequence only)          | - | 0,8  | TCCAC                 | AT3G14230                                                                                                                                                                                                                                                                                                                                                                                                                 |
| 26  | TF_motif_seq_0254 | AP2; ERF                       | - | 0,8  | CAGAT                 | AT1G51600;AT2G45050;AT3G06740;AT3G16870;AT3G21175;AT3G24050;AT3G54810;AT3G60530;AT4G17570;AT4G24470;AT4G26150;AT4G32890;AT4G34680;AT5G25830;AT5G26930;AT5G56860;AT5G66320;AT2G18380;AT3G50870;AT4G36620                                                                                                                                                                                                                   |
| 27  | TF_motif_seq_0237 | GATA; tify                     | - | 1    | AGATA                 | AT1G51600;AT2G45050;AT3G06740;AT3G16870;AT3G21175;AT3G24050;AT3G54810;AT3G60530;AT4G17570;AT4G24470;AT4G26150;AT4G32890;AT4G34680;AT5G25830;AT5G26930;AT5G56860;AT5G66320;AT2G18380;AT3G50870;AT4G36620                                                                                                                                                                                                                   |
| 28  | TF_motif_seq_0243 | GATA; tify                     | - | 1    | GATAG                 | AT3G14230                                                                                                                                                                                                                                                                                                                                                                                                                 |
| 30  | TF_motif_seq_0254 | AP2; ERF                       | - | 1    | TAGAT                 | AT1G51600;AT2G45050;AT3G06740;AT3G16870;AT3G21175;AT3G24050;AT3G54810;AT3G60530;AT4G17570;AT4G24470;AT4G26150;AT4G32890;AT4G34680;AT5G25830;AT5G26930;AT5G56860;AT5G66320;AT2G18380;AT3G50870;AT4G36620                                                                                                                                                                                                                   |
| 31  | TF_motif_seq_0237 | GATA; tify                     | - | 1    | AGATA                 | AT1G51600;AT2G45050;AT3G06740;AT3G16870;AT3G21175;AT3G24050;AT3G54810;AT3G60530;AT4G17570;AT4G24470;AT4G26150;AT4G32890;AT4G34680;AT5G25830;AT5G26930;AT5G56860;AT5G66320;AT2G18380;AT3G50870;AT4G36620                                                                                                                                                                                                                   |
| 32  | TF_motif_seq_0243 | GATA; tify                     | - | 1    | GATAG                 | AT3G14230                                                                                                                                                                                                                                                                                                                                                                                                                 |
| 34  | FmatrixID_0214    | C2H2                           | - | 0,98 | tagaACACTctgt         | AT2G28710;AT2G37430;AT3G46070;AT3G46080;AT3G46090                                                                                                                                                                                                                                                                                                                                                                         |
| 34  | TF_motif_seq_0254 | AP2; ERF                       | - | 0,8  | TAGAA                 | AT3G14230                                                                                                                                                                                                                                                                                                                                                                                                                 |
| 35  | TF_motif_seq_0010 | H5F                            | - | 0,88 | AGAAcactct            | AT3G24520;AT1G32330;AT1G46264;AT1G67970;AT2G26150;AT2G41690;AT3G02990;AT3G22830;AT3G51910;AT3G63350;AT4G11660;AT4G13980;AT4G17570;AT4G18880;                                                                                                                                                                                                                                                                              |
| 37  | FmatrixID_0211    | C2H2                           | - | 1    | aACACTc               | AT5G03720;AT5G16820;AT5G43840;AT5G45710;AT5G54070;AT5G62020                                                                                                                                                                                                                                                                                                                                                               |
| 37  | FmatrixID_0213    | C2H2                           | - | 1    | aACACTc               | AT1G27730;AT3G49930;AT3G60580;AT5G04340;AT5G43170                                                                                                                                                                                                                                                                                                                                                                         |
| 45  | FmatrixID_1233    | Myb/SANT; MYB-related          | - | 0,92 | gtgagctTTATCcgct      | AT1G02030;AT2G45120;AT3G19580;AT3G49930;AT3G60580;AT5G04340;AT5G43170                                                                                                                                                                                                                                                                                                                                                     |
| 46  | FmatrixID_1239    | Myb/SANT                       | - | 0,93 | tgagctTTATCcgct       | AT5G56840                                                                                                                                                                                                                                                                                                                                                                                                                 |
| 48  | FmatrixID_1050    | Storekeeper                    | - | 0,92 | agctTTATCcgct         | AT5G47390                                                                                                                                                                                                                                                                                                                                                                                                                 |
| 48  | FmatrixID_1240    | Myb/SANT                       | - | 0,92 | agctTTATCcgct         | AT4G00250                                                                                                                                                                                                                                                                                                                                                                                                                 |
| 48  | FmatrixID_1240    | Myb/SANT                       | - | 0,92 | agctTTATCcgct         | AT1G19000                                                                                                                                                                                                                                                                                                                                                                                                                 |
