# Supplementary material
Source: PubMed Central journal article supplement (PMC7667882)
Supplement: EMBJ-39-e104941-s002.pdf [file EMBJ-39-e104941-s002.pdf]

## Expanded View Figures

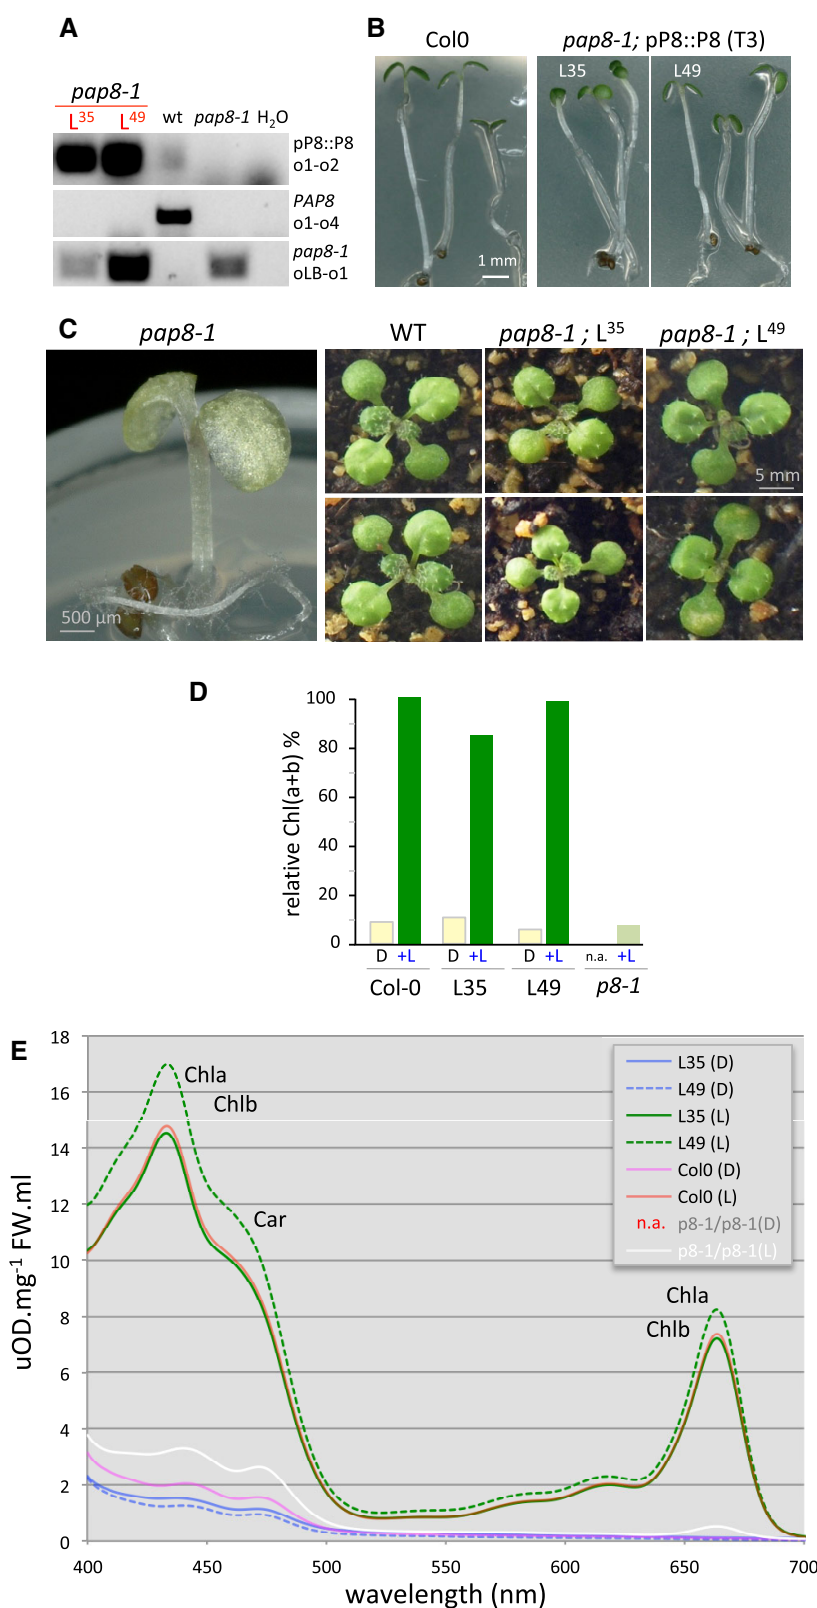

**Figure EV1. (Related to Fig 1) Functional complementation of *pap8-1*.**

The construction used for complementation is pPAP8::PAP8<sup>cds</sup> (pP8::P8 in short): PAP8 coding sequence under control of a 1.1-kb upstream region used as promoter (see pBB389 in Appendix Table S1 and Fig 2A for the description of the regulatory region used as promoter).

- A PCR on genomic DNA; L35, L49: Two independent “pBB389” transgenic lines; primers are the same as in Fig 1B and o4: op8i2\_R.
- B Greening assay on wild type and rescued *pap8-1* homozygous plants from third generation transgenic lines (T3) grown *in vitro* 3 days in the dark followed with a 30-h light treatment. L35 and L49 are two independent rescued lines.
- C Phenotypes of *pap8-1* homozygous plant grown *in vitro*, and two representative plants of wild type or *pap8-1/p8-1* (line L35 or line L49) grown on soil.
- D Content of total chlorophylls (Chl(a+b)) normalized to fresh weight and relative to wild type in the given genotypes grown in the dark (D) or grown in the dark followed with 30 h of white light treatment (+L); n.a. not applicable.
- E Spectrophotometric analysis of pigments: absorption spectra of acetone-soluble extracts from seedling grown *in vitro* 3 days in the dark (D) or 3 days in the dark plus 30 h of white light (L) Col-0, wild type; *p8-1/p8-1*, homozygous mutant *pap8-1*; L35 and L49, two lines of *pap8-1/pPAP8::PAP8*; n.a., not applicable. Absorbance was normalized to fresh weight (FW); Chla, chlorophyll a; Chlb, chlorophyll b; Car, carotenoids.

Source data are available online for this figure.

**Figure EV2. (Related to Fig 3) Sub-cellular localization of PAP8 variants.**

- A Transient assay in onion epidermal cells, pictures are given at the same scale. FL, full-length ORF; –G, translational fusion with GFP; ΔNLS, deletion of the NLS; ΔcTP, deletion of the cTP, ΔΔ, deletion of both the NLS and the cTP. Onion cell co-transfected with the corresponding variant fused to GFP and a plastid control fused to RFP (PAP10, PAP10-RFP or RecA, RecA-RFP) Merge, merged channels; DIC, differential interference contrast microscopy pictures to reveal the position of the nucleus within the cell when fluorescent nuclei were observed (marked with white arrowheads).
- B, C Confocal imaging of stably expressed CaMV35S::PAP8<sup>ΔcTP</sup>-GFP (B) or pPAP8::PAP8<sup>Δnls</sup>-GFP (C) in cotyledons of *Arabidopsis thaliana*; white arrowheads indicate nuclei; green arrowheads indicate sub-plastidial localization. Observations similar to (C) were recorded for pPAP8::PAP8<sup>FL</sup>-GFP.
- D Confocal imaging of stably expressed CaMV35S::PAP10-GFP in cotyledons of *Arabidopsis thaliana* showing the PEP-PAP complex; the green arrowhead indicates the putative location of PEP-PAP complexes within one chloroplast.
- E–H PAP8-GFP in stromules of onion epidermal cells expressed alone (E) or in co-localization with PAP10-GFP (F–H); stromules (str, white arrowheads) are only marked by PAP8-GFP.

Source data are available online for this figure.

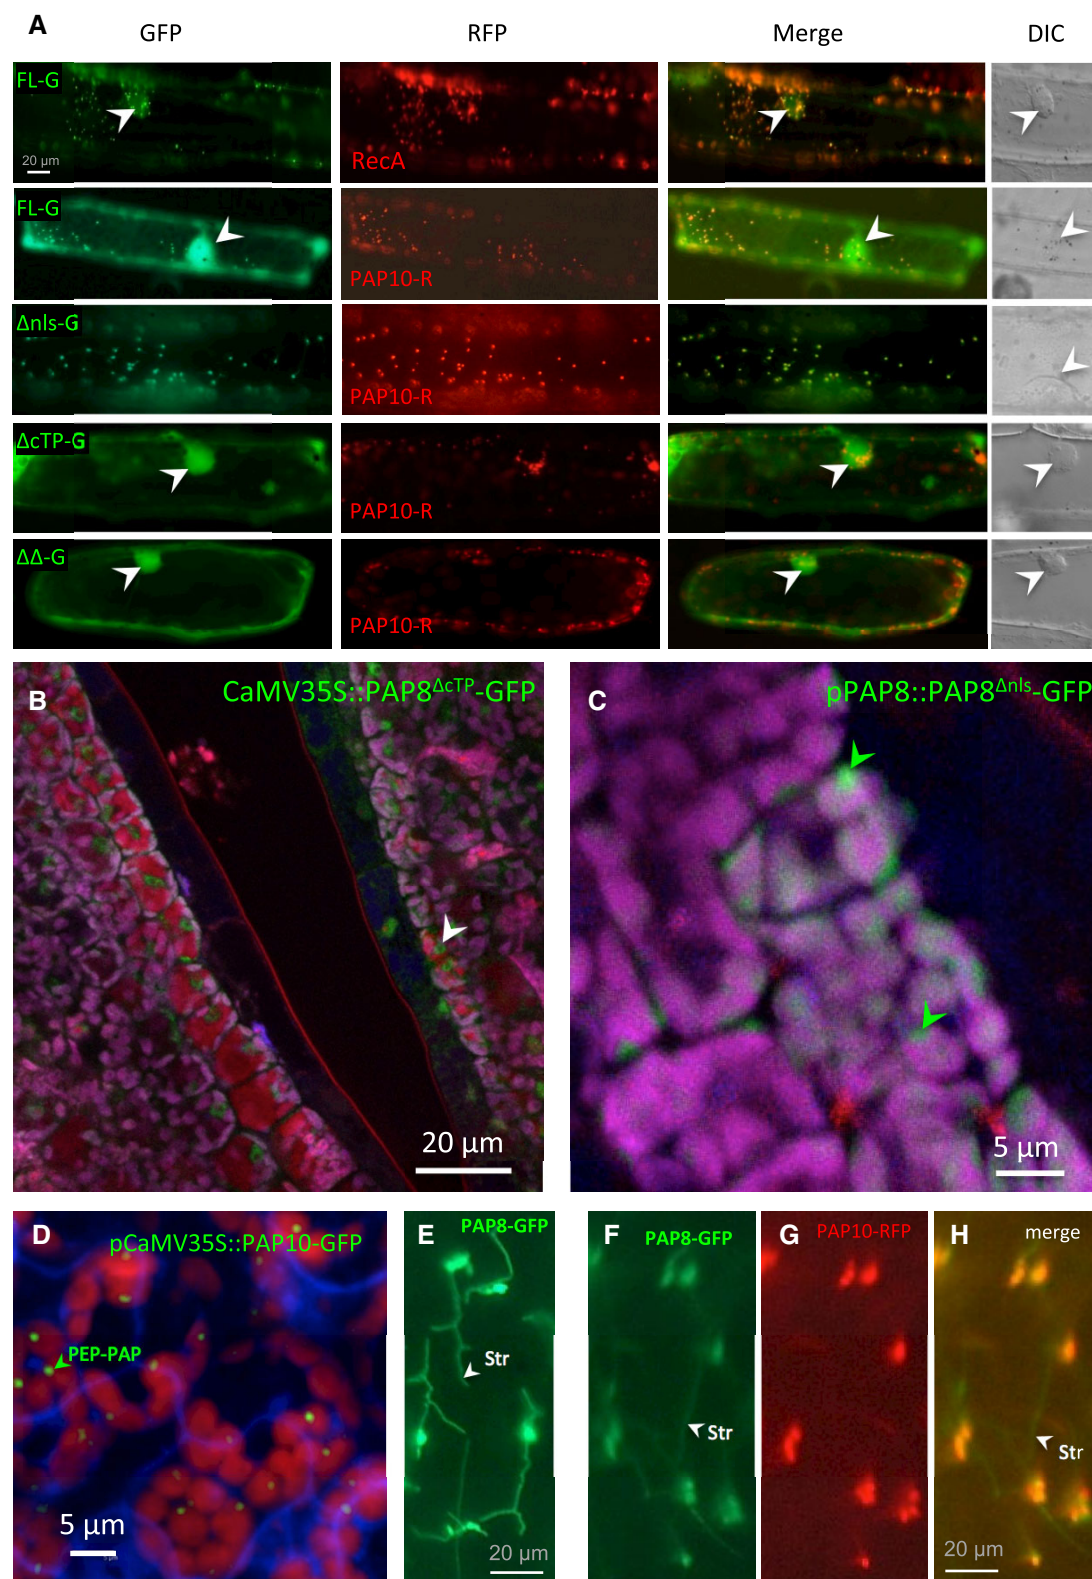

Figure EV2.

**Figure EV3. (Related to Fig 3) PAP8 and its variants fused to GFP.**

- A Schematic illustration of the GFP-fused PAP8 variants used for sub-cellular localization and functional complementation tests FL-G, PAP8 full-length ORF translationally fused to GFP;  $\Delta$ nls-G, deletion of the NLS (nuclear localization signal), ORF fused to GFP;  $\Delta$ cTP-G, deletion of the cTP (chloroplastic transit peptide), ORF fused to GFP;  $\Delta\Delta$ -G combined deletion of NLS and cTP in the ORF fused to GFP. The variants are expressed under the control of the CaMV35S promoter or under the native PAP8-1.1-kb promoter. Plasmid identification and relevant restriction sites for cloning are given in light grey (see Appendix Table S1); mcs, multiple cloning site.
- B Transgenic lines obtained with the constructions described above. Three phenotypic classes have been recorded corresponding to albino (white squares), pale green (light green squares) and green plants (green squares). Col-0, wild type; *pap8-1/+*, heterozygous mixture; *n*, total number of recorded plants;  $\emptyset$ , no transgene.
- C Functional complementation output. Hygromycin-resistant plants were transferred on soil and grown under long-day conditions (16-h light/8-h dark;  $\sim 70 \mu\text{mol m}^{-2} \text{s}^{-1}$ ) at 21°C and 60% humidity. Genomic DNA was isolated from true leaves and used for genotyping. The presence of the *pap8-1* allele was confirmed using the primer ortpF/oLBb1.3. PAP8 wild-type allele tested with ortpF/op8i2\_R. The insertion of the transgene of interest was tested with oPAP8\_rtp\_F/oE3\_R. The number of the tested plants (Hyg<sup>R</sup>#T1), the number of double heterozygous plants (*p8-1/+*; TG/−) and the number of sesqui-mutant plants (*p8-1/p8-1*; TG/−) are depicted for each construction; p8P8 presented as positive control. None of the 39 T1 plants with pP8::PAP8-GFP were photosynthetic and homozygous *pap8-1*. Therefore, two doubly heterozygous (*pap8-1/+*; TG/−) expressing GFP were tested for their segregation pattern (Line 1: 34% albino, *n* = 169, and Line 2: 24% albino, *n* = 199) and compared to that of *pap8-1/+* (28% albinos, *n* = 99). In the absence of statistical difference between the samples ( $\epsilon = 0.102 \ll 1.96$  for  $\alpha = 0.05$ ;  $\epsilon$ -test, Fisher Yates), PAP8-GFP was declared not functional as opposed to PAP8.

Source data are available online for this figure.

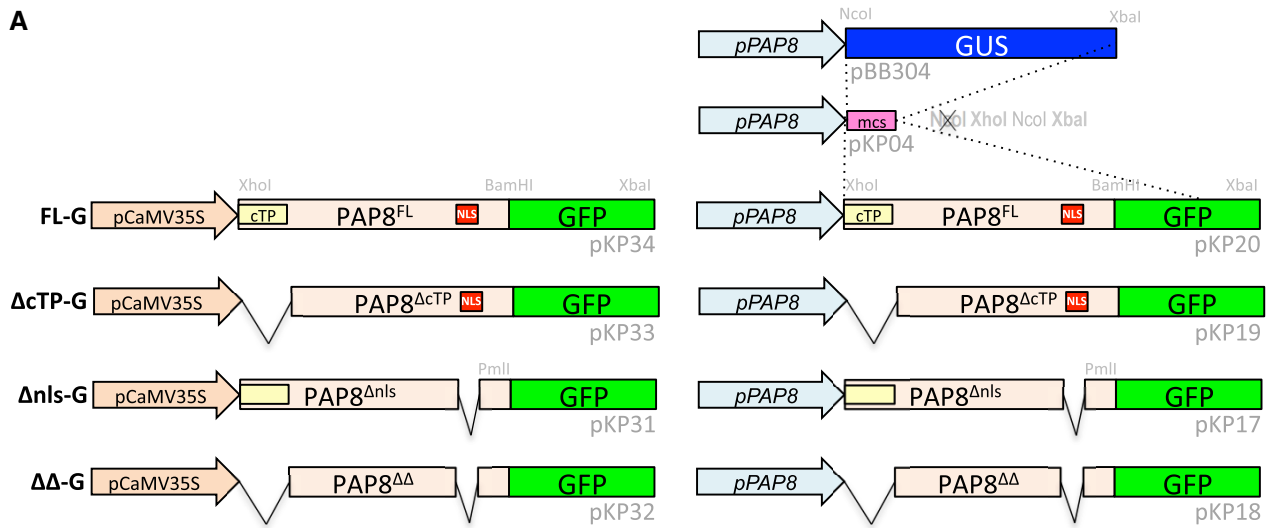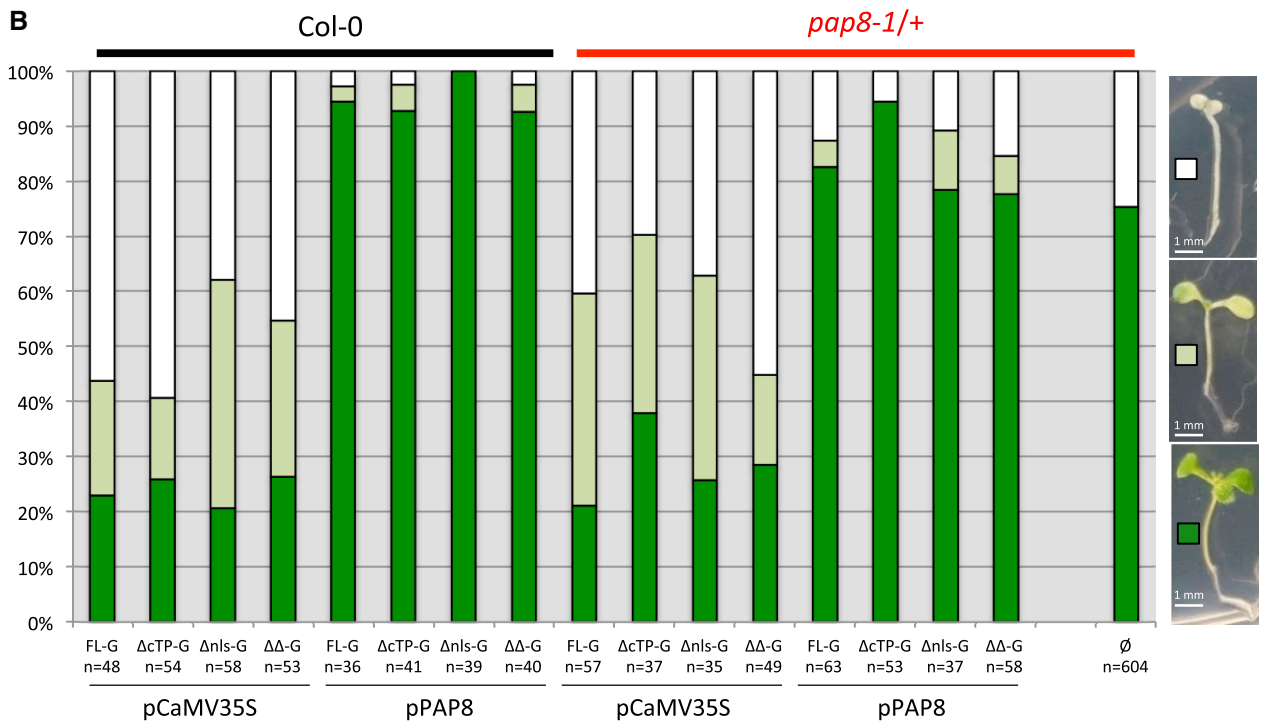

**C**

| Transgene (TG) tested in FC              | plasmid ID | Hyg <sup>R</sup> # T1 | <i>p8-1/+</i> ; TG/- | <i>p8-1/p8-1</i> ; TG/- |
|------------------------------------------|------------|-----------------------|----------------------|-------------------------|
| <i>pPAP8::PAP8<sup>Δnls</sup>:GFP</i>    | pKP17      | 17                    | 8                    | 0                       |
| <i>pPAP8::PAP8<sup>ΔΔ</sup>:GFP</i>      | pKP18      | 21                    | 9                    | 0                       |
| <i>pPAP8::PAP8<sup>ΔcTP</sup>:GFP</i>    | pKP19      | 32                    | 17                   | 0                       |
| <i>pPAP8::PAP8<sup>FL</sup>:GFP</i>      | pKP20      | 39                    | 9                    | 0                       |
| <i>pCaMV355::PAP8<sup>Δnls</sup>:GFP</i> | pKP31      | 10                    | 2                    | 0                       |
| <i>pCaMV355::PAP8<sup>ΔΔ</sup>:GFP</i>   | pKP32      | 11                    | 7                    | 0                       |
| <i>pCaMV355::PAP8<sup>ΔcTP</sup>:GFP</i> | pKP33      | 15                    | 6                    | 0                       |
| <i>pCaMV355::PAP8<sup>FL</sup>:GFP</i>   | pKP34      | 16                    | 5                    | 0                       |
| <i>pPAP8::PAP8 (p8P8)</i>                | pBB389     | 151                   | 36                   | 19                      |

Figure EV3.

**A**

|                             |     |     |     |     |     |     |     |     |
|-----------------------------|-----|-----|-----|-----|-----|-----|-----|-----|
| <i>PAP8<sup>wt</sup></i>    | ... | aga | aaa | agg | gat | agg | aag | ... |
|                             |     | R>G | K>G | R>G | D   | R>G | K>G |     |
| <i>pap8<sup>NLSm5</sup></i> | ... | gga | gga | ggg | gat | ggg | ggg | ... |

**B**

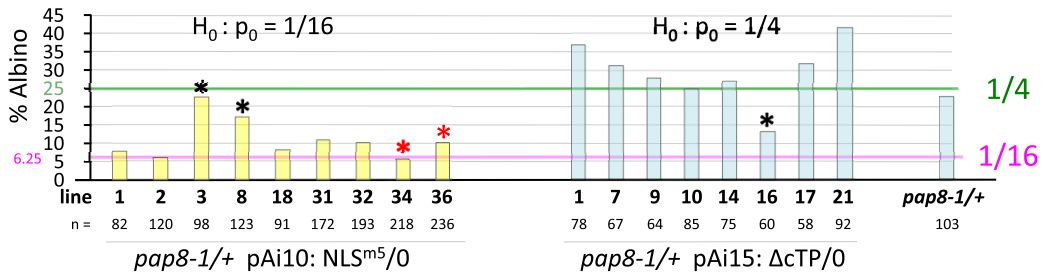

**C**

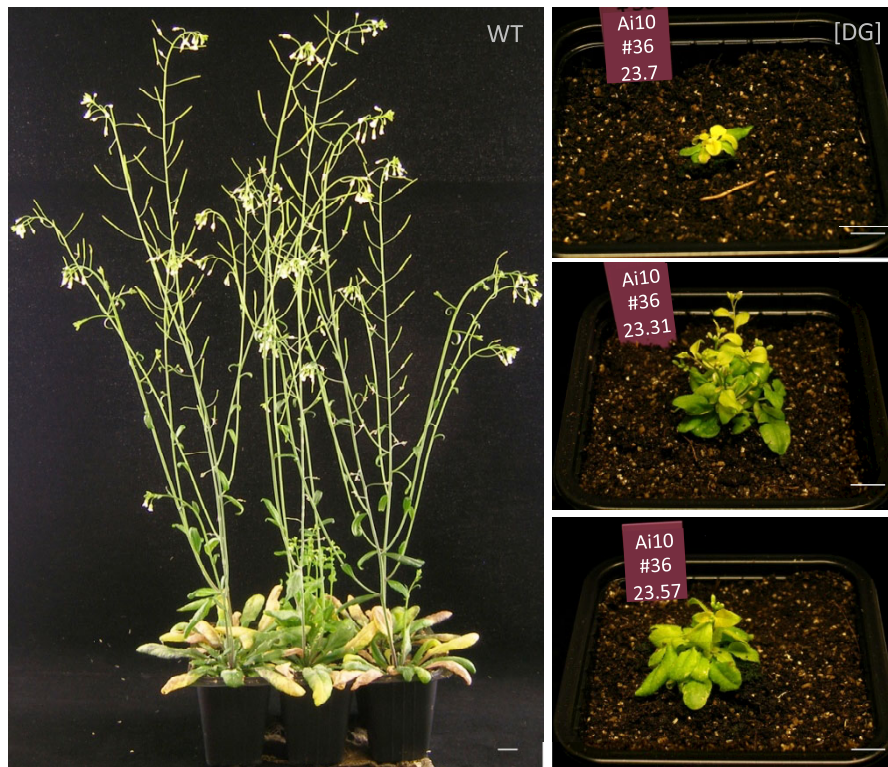

**Figure EV4. (Related to Fig 4) Hemi-complementation test in *pap8-1*.**

- A Genetic alterations of the *pap8<sup>NLSm5</sup>* allele. Altered codons and corresponding changes in amino acids (central line) are in magenta; the sign “>” indicates aa replacement at the same position.
- B Bar graph representing the albino segregation ratios in doubly heterozygous transgenic lines (*pap8-1/+*; TG/–) obtained with pPAP8::PAP8NLSM5 (NLSM5: pAi10) and pPAP8::PAP8ΔcTP (ΔcTP: pAi15). *pap8-1/+* used as control; n, total number of recorded plants. Segregation pattern were tested using ε-test with null hypothesis set to  $p_0 = 1/16$  (greening complementation) for NLSM5 and  $p_0 = 1/4$  (no complementation) for ΔcTP (see data source); black \*, outliers correspond to the samples that did not pass the statistical test; red \* indicate chosen genotypes for follow-up studies.
- C Phenotype of *pap8-1* transformed with pPAP8::PAP8<sup>NLSm5</sup>. WT, 5-week-old Col-0 control; [DG], delayed greening phenotype observed for the partial rescue of *pap8-1* mutant expressing PAP8<sup>NLSm5</sup> under its endogenous promoter; pictures depict three 15-week-old plants in which the alteration of the greening corresponds to the emergence of white leaves that slowly acquire the photosynthetic apparatus; plants #7, #31 and #57 are siblings of the same genotype (Ai10#34). Scale bars equal 10 mm.

Source data are available online for this figure.

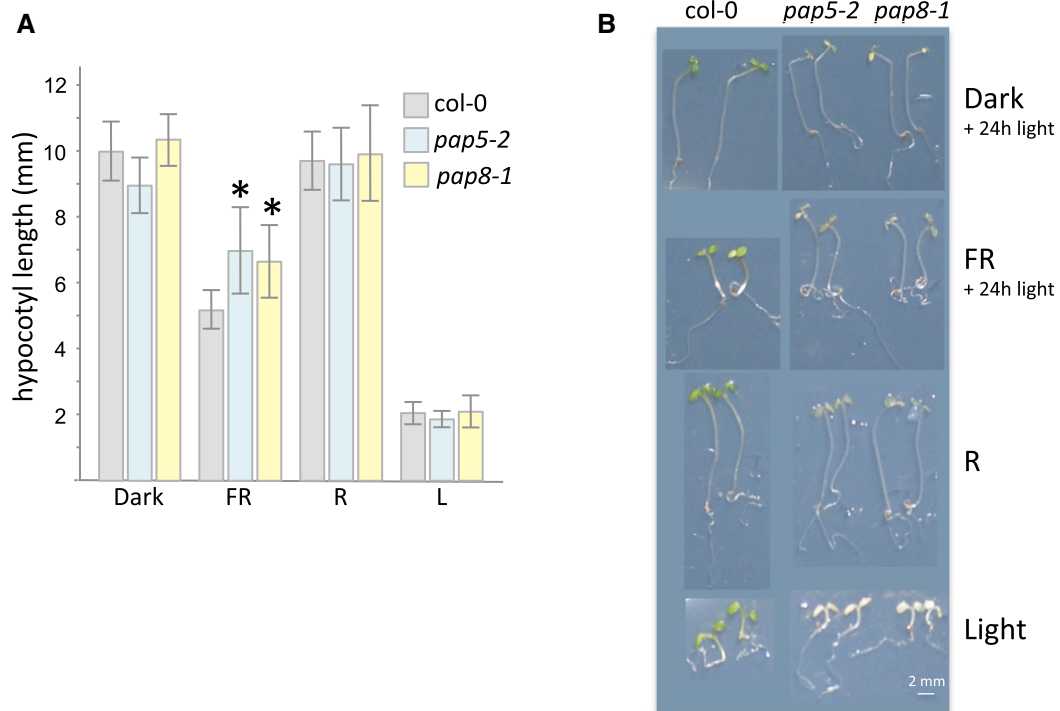

#### Figure EV5. Hypocotyl growth experiment.

A Hypocotyl length measurements, given as mean  $\pm$  SD, of genotypes grown under different light sources. Individual measurements and sample sizes are given in source data. Dark, true dark treatment; FR, far-red light (low fluence approx.  $10 \mu\text{mol m}^{-2} \text{s}^{-1}$ ; peak at  $730 \text{ nm} \pm 10 \text{ nm}$ ); R, red light ( $8 \mu\text{mol m}^{-2} \text{s}^{-1}$  peak at  $660 \text{ nm} \pm 10 \text{ nm}$ ); L, white light  $30 \mu\text{mol m}^{-2} \text{s}^{-1}$ . Whereas *pap5-2* and *pap8-1* are statistically undistinguishable using  $\delta$ -test for the comparison of the mean (Fisher Yates  $\delta = 0.791 \ll U\alpha = 0.05 = 1.96$ , not significant at  $\alpha$  set to 0.05), both *pap5-2* and *pap8-1* show significant hypocotyl differences compared with wild type ( $\delta = 5.374$ ;  $\delta = 5.061$  respectively so that both  $*P$ -values  $< 10^{-6}$ ).

B Images of representative seedlings.

Source data are available online for this figure.
